# Supplementary material for: Integrated metabolome and transcriptome analysis reveals potential mechanism during the bud dormancy transition of Astragalus membranaceus (Fisch.) Bge. var. mongholicus (Bge.) Hsiao
Source: Front Plant Sci. 2025 Jan 21;15:1483538. doi: 10.3389/fpls.2024.1483538 (PMC11790638; doi:10.3389/fpls.2024.1483538)
Supplement: Supplementary file 1 [file Table1.xlsx]

## Sheet: Table S1
Table S1 Primer sequences used for qRT-PCR
Gene_ID	Gene_name	Forward primer	Reverse primer
TRINITY_DN4778_c1_g1	ScrK	CACCGACGGCATAACATTTG	GCATATCAGCACTTGGGTTTC
TRINITY_DN7925_c0_g1	AMY	TGGAGAATACTGGGACAGCTT	CCTGTTGGTTTCCCCTGG
TRINITY_DN3569_c0_g1	ISA1	GACACTAGCCGTTTTGTG	CAGGAAGGTCAGGTGTGAGA
TRINITY_DN13423_c0_g1	TPP	AGAACAAGGTCAAGGCTCGG	GGATACTTCAGCAGCCAGGT
TRINITY_DN34977_c0_g1	GA3	CAGAGAAGTGATGATGGAAAAC	CAAACTCCTCCACATAAATCG
TRINITY_DN8660_c0_g1	GA2ox2	AGTGACGGAAGGTTTGTGGG	CTGGGACTGGAGGGTAGTGA
TRINITY_DN24320_c0_g1	CYP707A	AACTTGCAGAGATCGTGGCT	CAGCTTCTAAGACACTGGGGT
TRINITY_DN18555_c0_g1	GID2	ACTTTGGGAGCTGATCTGTAC	GGCAAAAGATAAAGCGAGTG
TRINITY_DN51757_c0_g1	ABI5	GGAAAATGAAAGGCTGAGGA	GATGCTATTCGGCGTAGTTG
TRINITY_DN51499_c0_g1	PYL6	CACAAACGCCACCATCCA	CATGTGCGCGTGGTGAA
TRINITY_DN10943_c0_g1	SAUR32	TGTGATTCTGAAAGCGTGGC	ACCTTTGTTTCTGGGGTCCAA
TRINITY_DN6952_c1_g2	ARF7	CATCTAGACCAACCGACGGC	TGCTTCTGACCCTTAGTGGC
TRINITY_DN1394_c0_g1	WRKY54	CCTCGGTTCGGTACCATCTTC	CTGCAACAAGTGCTGCTCTAAA
TRINITY_DN4537_c0_g1	PPLZ02	CTGCAGAGGATGCAGCTAGAG	TGTTGCTTGTGGTTGTGGAGA
TRINITY_DN6107_c0_g1	TGA3	GTGCGTGGAAAGCTTCTATTGA	TGCTCGCAATTTGTTGATCTG
TRINITY_DN8806_c0_g1	LUH	TTGGTGGCTCTATTGTGTCC	GTGTTCCTCAGGTGTGCTCT
	18S RNA	TGCAGAATCCCGTGAACCATC	AGGCATCGGGCAACGATATG

## Sheet: Table S2
Table S2 Differentially accumulated metabolites identified for underground buds of AMM
Metab ID	Metabolite	Formula	Retention time	HMDB Class	QC01	QC02	QC03	Oct.31_1	Oct.31_2	Oct.31_3	Nov.08_1	Nov.08_2	Nov.08_3	Nov.15_1	Nov.15_2	Nov.15_3	Nov.22_1	Nov.22_2	Nov.22_3	Dec.01_1	Dec.01_2	Dec.01_3
metab_3	N2-Malonyl-D-tryptophan	C14H14N2O5	4.9018	-	6.8444	6.82	6.8292	6.7466	6.2991	6.0898	7.1104	6.2344	6.3274	6.0284	6.3746	7.366	6.9931	6.8539	6.9456	6.7751	6.1882	5.8303
metab_9	4'-Hydroxyacetophenone 4'-[4-hydroxybenzoyl-(->5)-apiosyl-(1->2)-glucoside]	C26H30O13	6.1298	-	7.3291	7.3075	7.3023	7.1252	6.8742	7.1833	7.2824	7.1482	7.2336	7.1935	6.9424	7.1683	7.5018	7.6441	7.4744	6.9366	6.9414	7.3744
metab_14	Citric acid	C6H8O7	1.6561	Carboxylic acids and derivatives	7.3707	7.3841	7.3588	7.6023	7.5942	7.5133	7.6094	7.4282	7.54	7.5081	7.1666	7.3842	7.2294	7.2972	7.1838	7.1427	7.3573	7.2261
metab_19	N-butanoyl-lhomoserine lactone	C8H13NO3	2.8352	-	5.2321	5.2775	5.2545	5.5484	5.3622	5.4124	5.3501	5.2343	5.3001	5.2341	5.2215	5.1647	5.2754	5.161	5.3429	5.1727	5.1352	5.1182
metab_22	3-hydroxy-adipic acid	C6H10O5	1.1891	-	7.3393	7.3838	7.3512	7.1017	7.1739	7.1928	7.183	7.3286	7.2789	7.3756	7.4007	7.372	7.4933	7.4381	7.445	7.5057	7.477	7.5545
metab_23	BETA-D-LACTOSE	C12H22O11	1.1822	Organooxygen compounds	8.117	8.1389	8.1179	7.5999	7.7624	7.7584	7.8753	8.0481	8.0018	8.132	8.1742	8.1334	8.257	8.1886	8.1909	8.2918	8.253	8.3446
metab_26	6-{[3-(2,4-dihydroxy-5-methoxyphenyl)prop-2-enoyl]oxy}-3,4,5-trihydroxyoxane-2-carboxylic acid	C16H18O11	3.4606	-	5.4706	5.5196	5.4803	5.2585	5.285	5.2453	5.6896	5.3523	5.5935	5.5876	5.603	5.2935	5.5582	5.051	5.5017	5.6149	5.5313	5.3958
metab_44	3,6,7-Trihydroxy-4'-methoxyflavone 7-rhamnoside	C22H22O10	6.242	-	5.6956	5.6309	5.6355	5.4145	5.3345	5.3319	5.7014	5.653	5.9348	5.7036	5.5924	5.8315	5.7359	5.716	5.6499	5.9176	5.9526	5.9321
metab_53	Neoannonin B	C37H66O6	7.2741	Fatty Acyls	6.2787	6.2845	6.2708	6.5437	6.5589	6.5053	6.3239	6.287	6.3792	6.4964	6.2708	6.1352	6.0802	6.0733	6.2485	5.8964	6.0521	5.9618
metab_54	GPA(14:0/22:5)	C39H67O8P	7.4835	-	6.5878	6.6894	6.5962	6.8294	6.6305	6.5842	6.8857	6.6948	6.8704	6.543	6.5791	6.5814	6.4501	6.4902	6.5178	6.6666	6.7168	6.4958
metab_55	GPA(18:2/18:2)	C39H69O8P	7.63	-	6.4076	6.556	6.422	6.629	6.4443	6.3857	6.7789	6.572	6.7511	6.392	6.4187	6.4409	6.2837	6.2743	6.3662	6.5233	6.4966	6.393
metab_61	Artemidiol	C13H14O4	4.8487	Isocoumarins and derivatives	5.7688	5.7302	5.7424	5.6009	5.2721	5.5047	5.4677	5.5557	5.6399	5.5552	5.7936	5.8458	5.8347	5.6661	5.9043	5.7575	5.4264	5.5834
metab_65	(E)-2-Butenyl-4-methyl-threonine	C9H17NO3	4.5804	-	6.0024	6.0042	5.993	6.0913	5.9016	6.0291	6.2302	6.0958	6.0318	6.0157	5.8371	6.1697	5.7473	6.0314	5.9731	5.7622	5.95	5.81
metab_80	Gamma-Glutamylalanine	C8H14N2O5	2.5664	Carboxylic acids and derivatives	5.283	5.2654	5.2741	5.3136	5.5028	5.3646	4.8288	5.0539	4.8574	4.7975	4.9499	4.9799	5.4449	5.6517	5.9282	4.612	4.8223	5.2346
metab_87	Cysteinyl-Proline	C8H14N2O3S	2.7488	Carboxylic acids and derivatives	6.5323	6.4894	6.5343	7.0276	6.1758	6.6357	5.9394	5.8569	5.989	6.2601	6.4695	6.5381	6.3107	6.4255	6.0681	6.1918	6.2833	6.3627
metab_89	3,4,5-trihydroxy-6-[(3-hydroxy-2-methylpropanoyl)oxy]oxane-2-carboxylic acid	C10H16O9	2.718	-	6.2029	6.2042	6.2093	5.9542	6.1858	6.169	6.0574	6.4142	6.0766	6.1263	6.0935	6.125	6.2559	6.3207	6.1793	6.1305	6.0055	5.9352
metab_97	2-(hydroxymethyl)-6-(2,4,6-trihydroxyphenyl)oxane-3,4,5-triol	C12H16O8	1.2239	-	6.6807	6.7065	6.6764	6.0012	6.2276	6.2256	6.3688	6.6001	6.5303	6.7071	6.7431	6.6889	6.8422	6.7692	6.7677	6.8763	6.8348	6.9393
metab_99	Monoethyl malonic acid	C5H8O4	1.1683	Carboxylic acids and derivatives	6.8967	6.9325	6.9033	6.6548	6.7175	6.73	6.7538	6.8626	6.8217	6.9267	6.9483	6.9326	7.0253	6.975	6.9929	7.0662	7.0252	7.0966
metab_108	3,4,5-trihydroxy-6-(2-oxoethoxy)oxane-2-carboxylic acid	C8H12O8	2.8772	-	5.9967	5.9558	5.9836	6.1584	6.0579	5.9866	6.2411	5.9724	6.1439	6.032	5.9373	6.0257	5.9247	5.7421	5.9056	5.9035	5.7788	5.8081
metab_109	4-O-Methylgallic acid	C8H8O5	2.9624	Benzene and substituted derivatives	4.5854	4.5403	4.5902	4.0318	4.0858	4.671	3.9865	3.9749	4.0255	4.4058	4.2188	4.1244	4.4134	5.5644	4.3406	4.0823	4.1077	4.1203
metab_111	Glu Leu	C11H20N2O5	3.1069	-	4.9088	4.9065	4.9474	5.2053	5.2111	5.0711	5.2384	5.1945	5.1539	5.0522	4.7755	4.8448	4.5696	4.6965	4.7286	4.5702	4.7223	4.5647
metab_113	(3S,5R,6R,7E)-3,5,6-Trihydroxy-7-megastigmen-9-one	C13H22O4	3.2184	Prenol lipids	4.7906	4.7452	4.7638	4.7314	4.7615	4.7417	4.701	4.7566	4.6645	4.7356	4.9491	4.9081	4.8007	4.6151	4.7743	4.6483	4.5347	4.3325
metab_130	3,4,5-trihydroxy-6-{[5-(4-hydroxy-3-methoxyphenyl)pentanoyl]oxy}oxane-2-carboxylic acid	C18H24O10	3.9809	-	5.887	5.8229	5.8377	5.9656	5.9476	6.0762	5.8237	6.0746	5.6821	5.6087	5.6485	5.7641	5.7973	5.7274	5.8896	5.9284	5.6974	5.4109
metab_142	6''-O-Malonylglycitin	C25H24O13	5.1225	-	8.3892	8.3844	8.3807	8.3746	8.1871	8.4212	8.2423	8.0515	8.3162	8.2192	8.2921	8.2924	8.4717	8.4163	8.4654	8.3319	8.2245	8.2963
metab_148	(3beta,15alpha,22S,24E)-3,15,22-Trihydroxylanosta-7,9(11),24-trien-26-oic acid	C30H46O5	5.4661	Prenol lipids	5.436	5.4508	5.4374	4.987	5.1718	4.9484	5.4619	5.6261	5.6377	5.4365	5.5725	6.0679	5.3029	5.2269	5.1064	5.2351	5.637	5.6093
metab_152	Corchorifatty acid A	C18H28O4	5.6036	Fatty Acyls	6.1554	6.1474	6.1342	6.4963	6.4237	6.4373	5.9648	5.9695	6.1525	6.1924	6.3028	6.1475	6.0521	6.013	5.9782	5.7423	5.9109	5.7965
metab_169	(9R,10S,12Z)-9,10-Dihydroxy-8-oxo-12-octadecenoic acid	C18H32O5	6.3258	Fatty Acyls	6.8148	6.7971	6.7882	7.0682	7.0942	7.0766	6.7686	6.7866	6.8064	6.8795	6.8486	6.7645	6.7119	6.8093	6.6299	6.3968	6.4658	6.3723
metab_185	PGE2 1,15-lactone	C20H30O4	6.5137	-	6.297	6.3177	6.2639	6.5543	6.3665	6.5508	6.2535	6.2401	6.3639	6.2743	6.2892	6.2069	6.0372	6.2231	6.1294	5.7672	5.836	5.9045
metab_191	20-Hydroxy-PGF2a	C20H34O6	6.4231	Fatty Acyls	7.1509	7.129	7.1187	7.1751	7.15	7.1882	7.0896	7.0674	7.154	7.0771	7.2187	7.0957	7.0038	7.1281	7.0478	6.8914	6.9996	6.9813
metab_206	LysoPA(0:0/18:2(9Z,12Z))	C21H39O7P	6.8555	Glycerophospholipids	5.746	5.8055	5.6566	5.9089	5.8304	5.9045	5.941	5.9929	6.0557	5.5775	5.4173	5.605	5.3948	5.4671	5.5483	5.3765	5.3901	5.4828
metab_208	PC(18:1/0:0)	C26H52NO7P	6.8904	-	7.5285	7.547	7.5344	7.1293	7.1335	7.2364	7.6587	7.5774	7.453	7.5255	7.6289	7.5397	7.6842	7.4945	7.6707	7.5247	7.3945	7.6636
metab_211	9,12,15-Octadecatrien-1-ol	C18H32O	6.9322	-	6.8666	6.8906	6.9754	6.7911	6.7593	6.7222	6.6784	6.9227	6.9912	6.7042	6.7318	6.7525	6.9177	6.8723	6.8446	6.668	6.87	7.0265
metab_216	Mosinone A	C37H64O7	7.0579	Fatty Acyls	5.9211	5.9003	5.7664	6.3847	6.3196	6.3299	5.7296	5.7056	6.0614	6.3104	5.7681	5.7354	5.318	5.6406	5.8531	5.0389	5.4433	5.3625
metab_225	GPEtn(14:0/22:4)	C41H74NO8P	7.4206	Glycerophospholipids	6.6013	6.5142	6.5052	6.2275	6.1196	6.0212	6.2243	6.0516	6.2703	6.2778	6.4512	6.369	6.3707	6.3415	6.4906	6.8036	6.8326	6.7684
metab_229	PA(16:0/18:3(9Z,12Z,15Z))	C37H67O8P	7.6718	Glycerophospholipids	6.0026	6.1766	6.0757	6.37	6.1445	6.0479	6.4452	6.1989	6.4132	6.0562	6.1102	6.0904	5.8963	5.8615	5.8356	6.1539	6.1217	5.9721
metab_231	PA(15:0/22:4(7Z,10Z,13Z,16Z))	C40H71O8P	8.4605	Glycerophospholipids	7.4505	7.3681	7.4307	7.2834	7.2417	7.3283	7.478	7.4256	7.4196	7.4897	7.443	7.5372	7.4673	7.4197	7.4315	7.2654	7.2369	7.3412
metab_253	Rollidecin D	C37H66O6	7.1834	Fatty Acyls	5.8558	5.8085	5.7901	6.113	6.3076	6.0155	5.8065	5.8519	5.8729	6.2309	5.8908	5.7512	5.789	5.7668	5.7333	5.5082	5.709	5.56
metab_254	PG(16:0/0:0)[U]	C22H45O9P	7.1346	-	6.6337	6.6144	6.5445	6.7522	6.6443	6.7182	6.7088	6.6648	6.5591	6.3518	6.4675	6.42	6.443	6.5308	6.4729	6.2595	6.3181	6.3058
metab_270	Ethyl (2E,4E,7Z)-Decatrienoate	C12H18O2	6.3748	Fatty Acyls	6.1992	6.202	6.1942	6.3798	6.3882	6.3874	6.1889	6.2117	6.1969	6.2455	6.2605	6.154	6.0726	6.1964	6.0944	5.969	6.0376	5.9914
metab_288	Ganoderal A	C30H44O2	6.207	Prenol lipids	7.2839	7.3187	7.2883	7.3492	7.5273	7.4284	7.2286	7.4608	7.0859	7.1922	7.3941	7.1971	7.1375	7.2606	7.227	7.0749	6.9959	7.0864
metab_305	26-Desglucoavenacoside A	C45H72O18	6.0102	Steroids and steroid derivatives	6.2977	6.2429	6.2691	6.2548	6.629	6.1519	6.2263	6.3158	5.1098	5.8581	6.4194	6.1261	6.2264	6.1732	6.0351	5.8529	5.9562	5.9233
metab_328	(8alpha,10beta,11beta)-3-Hydroxy-4,15-dinor-1(5)-xanthen-12,8-olide	C13H20O3	4.0612	Lactones	5.693	5.709	5.7005	5.535	5.4001	5.5246	5.7784	5.7352	5.7443	5.7894	5.6193	5.8505	5.7568	5.5391	5.795	5.9123	5.6689	5.7401
metab_335	N2-(D-1-Carboxyethyl)-L-lysine	C9H18N2O4	2.9775	-	5.7861	5.7681	5.783	6.0302	6.0089	5.8795	6.0474	5.92	5.8909	5.8344	5.6795	5.6302	5.362	5.6123	5.5071	5.498	5.5888	5.3852
metab_350	FAMPRIDINE	C5H6N2	0.7747	-	6.5372	6.5796	6.5627	6.1974	5.9919	6.4342	6.4808	6.5798	6.5895	6.63	6.3853	6.1029	6.549	6.5696	6.7352	6.5559	6.8265	6.5501
metab_382	(R)-b-amino-isobutyric acid	C4H9NO2	0.9403	-	7.2611	7.2953	7.2689	7.3063	7.235	7.3073	7.0918	7.1739	7.1188	7.2584	7.2528	7.2175	7.3459	7.3421	7.3047	7.3061	7.3639	7.4073
metab_385	1-Pyrroline	C4H7N	0.9677	Pyrrolines	6.6435	6.7168	6.6711	6.828	6.8453	6.8588	6.9213	6.7086	6.735	6.7436	6.4456	6.6466	6.4937	6.6045	6.49	6.7359	6.7033	6.7139
metab_386	L-2-Amino-5-hydroxypentanoic acid	C5H11NO3	0.9677	Carboxylic acids and derivatives	8.1334	8.17	8.1423	8.2824	8.2887	8.3133	8.3772	8.1783	8.1975	8.2089	7.8833	8.0953	7.9338	8.0614	7.9397	8.1944	8.1606	8.1736
metab_399	V-PYRRO/NO	C6H11N3O2	0.9056	Pyrrolidines	7.3833	7.4104	7.3992	7.6067	7.4458	7.3356	7.5799	7.4191	7.3002	7.3668	7.3397	7.5108	7.2338	7.1825	7.0054	7.4846	7.4524	7.1786
metab_400	Beta-D-Fructofuranosyl alpha-D-glucopyranosyl-(1->4)-D-glucopyranoside	C18H32O16	1.2864	Organooxygen compounds	6.8907	6.8958	6.8715	6.1839	6.1789	6.4897	6.2846	6.665	6.488	6.6992	6.8743	6.829	7.1631	7.0471	7.0436	7.2731	7.1175	7.218
metab_414	THTC	C5H8O2S	1.4815	-	6.0473	6.0674	6.0455	6.2583	6.2448	6.2281	6.3261	6.1984	6.2031	6.2236	6.0903	6.046	5.8506	5.9825	5.9288	5.7101	5.9111	5.8838
metab_458	Glutamylhistidine	C11H16N4O5	2.7226	Carboxylic acids and derivatives	5.3588	5.3932	5.4105	1.2434	2.8711	3.3073	3.914	3.5257	3.7532	2.9683	3.2477	5.3793	5.6892	6.2781	5.8964	3.1326	3.5442	3.4355
metab_470	CRESOPYRINE	C10H10O4	2.8211	-	4.8865	4.9378	4.9435	4.7299	4.4691	4.7383	5.0626	5.0646	4.8153	4.7595	4.9122	4.7617	4.9426	5.2944	5.0263	5.1957	4.7368	4.751
metab_482	3-(2-hydroxy-4-methoxyphenyl)prop-2-enal	C10H10O3	2.8912	-	4.6071	4.687	4.6376	4.5787	4.585	4.6099	4.494	4.5309	4.5921	4.6398	4.6122	4.6785	4.7121	4.7293	4.6294	4.7797	4.7215	4.8903
metab_487	3-Hydroxyphenylglycine	C8H9NO3	2.8912	-	4.5418	4.5929	4.5188	4.621	4.6895	4.6583	4.5165	4.4895	4.5569	4.8779	4.369	4.4822	4.3185	4.4383	4.4744	4.4636	4.6964	4.5015
metab_490	Dexpanthenol	C9H19NO4	2.9554	Organooxygen compounds	5.113	5.0619	5.0948	4.404	4.4617	4.3562	4.6341	5.0013	4.5932	4.4724	5.2991	4.4009	4.3895	4.3189	4.3529	4.639	4.7884	4.8285
metab_496	Gln Ile	C11H21N3O4	3.0105	-	5.4247	5.3963	5.3858	5.7178	5.6653	5.5663	5.7773	5.7109	5.6278	5.2782	5.1971	5.3246	4.9789	5.2581	5.214	5.0363	4.9808	4.736
metab_498	6-{[3-(2,4-dihydroxyphenyl)propanoyl]oxy}-3,4,5-trihydroxyoxane-2-carboxylic acid	C15H18O10	3.0221	-	5.0606	5.0744	5.0605	5.0658	4.6897	4.7727	4.3091	4.5934	5.0316	4.8745	4.9018	4.8612	5.0317	4.9866	5.1286	4.7562	4.511	4.4314
metab_508	Val Pro	C10H18N2O3	3.1679	-	4.401	4.3729	4.3875	4.6843	4.6133	4.5561	4.3441	4.213	4.3543	4.5318	4.3256	4.2426	3.8635	4.1945	4.3173	4.2006	4.2738	4.2234
metab_528	Guibourtinidol	C15H14O4	3.3998	-	5.4121	5.3749	5.4156	5.0481	4.9893	5.4824	5.466	5.0711	5.1519	5.1165	5.372	5.332	5.7531	5.4992	5.7931	4.9818	4.6112	5.3291
metab_529	N-Acetyl-DL-methionine	C7H13NO3S	3.3928	-	5.0133	4.9238	4.9608	5.146	5.1776	5.1023	4.9139	4.9257	4.8919	5.0151	4.9654	4.8422	4.729	4.9425	4.7416	4.8845	4.8596	4.8456
metab_532	Val Ala Gly Val Ala	C18H33N5O6	3.4411	-	4.7322	4.693	4.719	5.0136	5.2288	5.0349	5.0796	4.9477	4.9972	4.2179	4.5555	4.6076	4.2576	4.4808	4.5755	4.0626	4.2169	3.4469
metab_545	6-{3,5-dihydroxy-2-[3-(3,4,5-trimethoxyphenyl)propanoyl]phenoxy}-3,4,5-trihydroxyoxane-2-carboxylic acid	C24H28O13	3.6297	-	5.5212	5.4622	5.453	5.3003	5.1512	5.7063	5.4122	5.3597	5.37	4.9908	5.0677	5.3016	5.7684	5.7149	5.5309	5.1514	5.2427	5.5476
metab_548	Pro Leu Glu His	C22H34N6O7	3.6711	-	5.867	5.8359	5.8557	6.1891	6.1843	6.1094	5.3742	5.9095	6.1163	5.5863	5.9483	5.8418	5.3794	5.3146	5.5068	5.1393	5.3197	5.0123
metab_558	6-{[5-(3,4-dihydroxyphenyl)pentanoyl]oxy}-3,4,5-trihydroxyoxane-2-carboxylic acid	C17H22O10	3.8091	-	5.5082	5.4811	5.4506	5.4395	5.2852	5.1566	5.1169	5.3608	5.5832	5.2971	5.4799	5.6108	5.4637	5.6329	5.5045	5.3161	5.1711	5.2722
metab_559	3-(2-Methylpropylidene)-3alpha,4-dihydro-1(3H)-isobenzofuranone	C12H14O2	3.8183	Isobenzofurans	4.4356	4.4859	4.4361	4.8112	4.4536	4.7049	4.2665	4.1808	4.4165	4.3752	4.6666	4.3229	4.2608	4.5865	4.6318	4.1132	4.379	4.3339
metab_565	Kuwanon D	C25H26O6	3.8628	Flavonoids	5.0622	5.0438	5.0378	5.3871	5.3871	5.5012	5.1839	4.9864	5.0265	5.2294	4.7325	4.9719	4.9854	4.9247	5.22	3.5603	4.018	4.0166
metab_592	4-(3-Pyridyl)-3-butenoic acid	C9H9NO2	4.2663	Pyridines and derivatives	4.7577	4.8689	4.8392	5.0066	5.1177	4.1011	4.1544	4.2057	4.2106	4.4593	5.2584	4.946	5.3588	5.3699	4.6057	5.2871	4.2897	4.3143
metab_610	6-[2-(carboxymethyl)-3,5-dihydroxy-6-(3-methylbut-2-en-1-yl)phenoxy]-3,4,5-trihydroxyoxane-2-carboxylic acid	C19H24O11	4.5804	-	4.8078	4.7729	4.8477	2.9723	3.4893	3.6669	4.7119	3.9074	4.5812	1.6118	2.9256	4.5596	5.5845	4.5036	5.3702	5.0186	1.8761	2.4132
metab_617	(E)-8-Hydroxy-2-octene-4,6-diynoic acid	C8H6O3	4.6135	Fatty Acyls	5.8681	5.8579	5.9033	5.9925	5.3901	5.8572	5.7928	5.7892	5.6539	5.8372	6.0173	5.8849	6.0821	5.9944	6.1409	5.577	5.4373	5.7331
metab_666	6-{4-[(1E)-3-{[3-(3,4-dihydroxyphenyl)-1-methoxy-1-oxopropan-2-yl]oxy}-3-oxoprop-1-en-1-yl]-2-hydroxyphenoxy}-3,4,5-trihydroxyoxane-2-carboxylic acid	C25H26O14	5.6607	-	5.5036	5.5453	5.5011	5.8184	5.1455	5.5207	5.2996	4.8942	5.0841	5.5916	5.4202	5.3936	5.7885	5.7636	5.562	4.8677	4.9258	4.96
metab_670	3-Hydroxy-4'-methoxyflavone 3-glucoside	C22H22O9	5.7304	-	6.3617	6.4093	6.3243	6.119	6.1248	6.3586	6.1281	5.9991	6.2193	6.1914	6.3079	6.3421	6.5659	6.5288	6.4903	6.4066	6.3271	6.4816
metab_689	Geijerone	C12H18O	5.9892	Prenol lipids	5.6299	5.6392	5.6272	5.7455	5.6418	5.788	5.584	5.6039	5.5409	5.7422	5.791	5.6691	5.3911	5.6224	5.5308	5.5922	5.6162	5.5329
metab_690	Norecasantalic acid	C11H16O2	5.9962	Prenol lipids	4.4217	4.4347	4.3813	4.6224	4.7263	4.5892	4.438	4.4687	4.5186	4.4097	4.3684	4.3401	4.3182	4.3732	4.3175	4.2309	4.2615	4.2286
metab_693	Formononetin 7-(6''-malonylglucoside)	C25H24O12	6.0458	-	7.424	7.4096	7.3838	7.3269	7.1581	7.5669	7.2942	7.0683	7.3244	7.1602	7.2656	7.3501	7.5306	7.4379	7.5775	7.2183	7.1741	7.2108
metab_700	3,4,5-trihydroxy-6-{[(4E)-5-(4-methoxyphenyl)-3-oxopent-4-en-1-yl]oxy}oxane-2-carboxylic acid	C18H22O9	6.1018	-	5.4366	5.4887	5.4664	4.7281	4.101	3.7251	5.3821	5.5087	3.9987	5.1225	4.653	4.3689	6.3409	5.8723	5.5197	3.7789	4.4482	3.6727
metab_704	Valerenolic acid	C15H22O3	6.1298	Prenol lipids	5.6654	5.6586	5.6477	6.0439	6.0847	6.0629	5.5778	5.7188	5.8094	5.7444	5.7157	5.6382	5.5381	5.531	5.4453	5.1778	5.2881	5.2743
metab_723	Dinor-PGE2	C18H28O5	6.2839	-	5.9211	5.9315	5.9105	6.3	6.3936	6.325	5.9806	6.0869	6.1123	6.1176	5.801	5.8159	5.7382	5.7849	5.7156	5.2756	5.4764	5.4563
metab_727	Oblongolide	C14H20O2	6.2979	-	4.9649	4.9959	4.9857	5.3849	5.3361	5.3566	4.899	5.0154	5.0642	5.1863	4.9652	4.9597	4.8562	4.8963	4.7755	4.468	4.6113	4.6713
metab_746	2,3-dinor Prostaglandin E1	C18H30O5	6.3678	-	6.7084	6.6844	6.6767	7.0374	7.0498	7.1293	6.6742	6.7252	6.8049	6.7273	6.6221	6.5887	6.5469	6.6333	6.5114	5.9626	6.133	6.1291
metab_755	3-methoxy Prostaglandin F1alpha	C21H38O6	6.4301	-	5.5006	5.4876	5.4656	5.9025	5.8362	6.0051	5.5637	5.6418	5.7393	5.6755	5.2389	5.3426	5.3542	5.3774	5.3195	4.6813	4.8382	4.7548
metab_782	Momordin I	C41H64O13	6.5137	Prenol lipids	6.2741	6.212	6.2192	6.1916	6.9329	6.6015	5.5513	6.6755	4.0511	5.003	6.1089	4.9017	4.8421	5.7711	5.8054	3.9674	4.274	4.3534
metab_786	Avocadyne 4-acetate	C19H34O4	6.5276	Fatty Acyls	5.077	5.0344	5.1092	5.5871	5.3652	5.4417	5.1369	5.2332	5.1577	5.2621	4.8713	4.971	4.8273	5.0574	4.9769	4.7597	4.4698	4.6112
metab_801	Gamma-Eudesmol rhamnoside	C21H36O5	6.5763	Prenol lipids	5.7659	5.7522	5.589	5.9928	5.866	5.9477	5.6614	5.8141	5.8682	5.6256	5.3199	5.4396	5.4585	5.5286	5.368	5.6381	5.092	5.1774
metab_835	1-(9Z,12Z,15Z-octadecatrienoyl)-glycero-3-phosphate	C21H37O7P	6.7648	Glycerophospholipids	5.444	5.5246	5.3848	5.7109	5.6948	5.6603	5.6832	5.6973	5.7783	5.4047	5.239	5.3708	5.0476	5.2865	5.2372	5.3443	5.1359	4.961
metab_844	Docosatrienoic acid	C22H38O2	6.7997	Fatty Acyls	5.5323	5.5319	5.5351	5.5352	5.2541	5.5243	5.5386	5.546	5.4067	5.2824	5.5308	5.7696	5.4133	5.6635	5.7511	5.2472	5.3264	5.2591
metab_854	LPA(18:2(9Z,12Z)/0:0)	C21H39O7P	6.8555	Glycerophospholipids	5.7577	5.8173	5.7574	5.9665	5.9206	5.9954	6.0622	6.0367	6.0943	5.7262	5.6304	5.7166	5.605	5.6567	5.693	5.5903	5.5704	5.6118
metab_882	DG(18:3(6Z,9Z,12Z)/18:3(9Z,12Z,15Z)/0:0)	C39H64O5	7.0649	Fatty Acyls	6.341	6.3378	6.3183	6.5681	6.5471	6.5754	6.4141	6.441	6.4068	6.4741	6.3105	6.3435	6.3368	6.3752	6.3414	6.1882	6.0959	6.1136
metab_883	DGDG(18:3/18:3)	C51H84O15	7.0649	-	6.6968	6.6703	6.572	6.7204	6.5417	6.7148	6.6717	6.6772	6.6422	6.4086	6.5671	6.5867	6.543	6.662	6.6336	6.5513	6.2894	6.3944
metab_884	Muconin	C37H66O7	7.0858	Fatty Acyls	6.4457	6.4261	6.3497	6.6887	6.6808	6.6183	6.2632	6.3366	6.4279	6.6672	6.399	6.2603	6.383	6.3068	6.382	6.1019	6.1598	6.1169
metab_889	MGDG(18:3/18:3)	C45H74O10	7.1416	-	6.3941	6.3369	6.3145	6.5237	6.3753	6.5725	6.4824	6.5253	6.4746	5.9572	6.2565	6.2181	6.1486	6.3533	6.3879	6.3689	6.0997	6.0214
metab_908	GPEtn(14:0/20:3)	C39H72NO8P	7.4486	Glycerophospholipids	6.139	6.021	6.1098	5.7432	5.7194	5.4782	5.4402	5.2987	5.5882	5.9096	6.0762	5.9338	5.8808	5.9506	6.0733	6.498	6.5092	6.2321
metab_921	1-Palmitoyl-2-linoleoyl PE	C39H74NO8P	7.602	-	6.3129	6.2731	6.2908	6.0793	5.963	5.7888	5.9683	5.8287	5.9946	6.1812	6.2824	6.1842	6.1219	6.156	6.2379	6.5809	6.61	6.5515
metab_936	GPCho(18:1/18:4)	C44H78NO8P	8.2021	Glycerophospholipids	7.5666	7.5118	7.5902	6.8953	6.7494	6.6773	6.6792	6.3145	6.6955	7.2849	7.4617	7.2568	7.1334	7.4273	7.4784	8.028	8.0841	7.7504
metab_1040	GPEtn(14:0/22:5)	C41H72NO8P	7.2881	Glycerophospholipids	6.4264	6.3503	6.3719	6.0598	5.9843	5.8157	5.9255	5.7491	5.9618	6.1308	6.3382	6.1492	6.1721	6.2517	6.272	6.7982	6.8064	6.5371
metab_1060	GPEtn(18:3/18:3)	C41H70NO8P	7.1765	Glycerophospholipids	5.7984	5.6188	5.8462	5.0616	5.0484	5.0005	4.9101	4.4054	5.078	5.6319	5.6765	5.6413	5.5718	5.7183	5.7282	6.3247	6.3522	5.8506
metab_1062	Annomutacin	C37H68O7	7.1416	Fatty Acyls	5.9947	5.9781	6.015	6.2937	6.2565	6.2271	5.966	6.0371	6.1674	6.2343	5.9236	5.8313	5.7888	5.8279	6.0097	5.6126	5.7989	5.9295
metab_1102	LysoPE(16:0/0:0)	C21H44NO7P	6.8067	Glycerophospholipids	6.3115	6.2752	6.1701	6.2773	6.1366	6.2636	6.244	6.3053	6.2331	6.0426	6.2032	6.0583	6.1258	6.1274	6.1347	6.1238	6.0966	6.0896
metab_1180	13S-HpOTrE(gamma)	C18H30O4	6.451	-	6.8069	6.7949	6.7704	7.1014	7.081	7.0665	6.762	6.7581	6.8327	6.8255	6.8777	6.7268	6.6972	6.7417	6.7355	6.0894	6.3483	6.1199
metab_1188	(+/-)9-HpODE	C18H32O4	6.4301	-	6.7104	6.6963	6.6977	6.8768	6.9349	6.9453	6.5508	6.5902	6.7693	6.7834	6.8173	6.6582	6.5404	6.6745	6.6817	6.1945	6.4227	6.3707
metab_1190	Soyasaponin I	C48H78O18	6.4162	Prenol lipids	6.773	6.7395	6.7506	6.8544	6.8182	6.6892	6.8074	6.8309	6.8874	7.0093	6.5704	6.734	6.605	6.5658	6.6319	6.3806	6.6863	6.5588
metab_1217	4-Methyl-1-phenyl-2-pentanol	C12H18O	6.3748	Benzene and substituted derivatives	5.1142	5.1429	5.1609	5.3305	5.3339	5.3781	5.1489	5.1847	5.1374	5.144	5.1958	5.1038	4.9767	5.133	5.0675	4.869	4.9814	4.9586
metab_1313	Luteolin 3'-methyl ether 7-malonylglucoside	C25H24O14	6.207	-	6.4557	6.492	6.4519	6.2616	6.4948	6.4072	6.8004	6.9619	6.7655	6.3732	6.2104	6.5351	6.515	6.5629	6.6264	6.2642	6.299	6.3333
metab_1327	Soyasapogenol E	C30H48O3	6.1788	Prenol lipids	6.4954	6.5252	6.4969	6.4054	6.5583	6.665	6.5233	6.4389	6.4541	6.6771	6.6489	6.5321	6.4448	6.5816	6.4828	6.4492	6.2274	6.3261
metab_1339	Lactupicrin	C23H22O7	6.1298	Phenols	5.3273	5.3009	5.2894	5.0313	4.8125	5.1414	5.2839	5.0803	5.1637	5.1072	4.9549	5.1478	5.4927	5.6201	5.4712	4.857	4.8206	5.3905
metab_1340	1-[2-(2H-1,3-benzodioxol-5-yl)-1-benzofuran-5-yl]propane-1,3-diol	C18H16O5	6.1298	-	5.3416	5.3235	5.3497	5.144	4.843	5.231	5.3692	5.1354	5.2592	5.2432	4.9579	5.2077	5.5824	5.709	5.5317	4.9354	4.944	5.4592
metab_1341	Tetracosahexaenoic acid	C24H36O2	6.1298	Fatty Acyls	5.8964	5.9155	5.896	5.8257	5.9117	5.9504	5.9159	5.9034	5.6255	5.6722	5.7979	5.795	5.9038	5.8382	6.0015	6.053	5.8874	6.1713
metab_1343	Oroxylin A	C16H12O5	6.1298	-	6.9608	6.946	6.9423	7.0905	6.6701	6.984	6.9973	6.7945	7.0864	6.9995	7.0095	6.6947	7.0858	7.1893	7.1814	6.7854	6.6978	6.7886
metab_1348	3-(4-Hydroxyphenyl)-1-(4-hydroxy-2-methoxyphenyl)-2-propen-1-one	C16H14O4	6.1228	Linear 1,3-diarylpropanoids	5.6851	5.6548	5.6768	5.44	5.1924	5.5273	5.6547	5.4916	5.62	5.5437	5.298	5.5386	5.9014	6.0489	5.8432	5.3005	5.3182	5.7636
metab_1356	His Val Asp Arg	C21H35N9O7	6.1018	-	5.3158	5.3017	5.3232	5.5391	5.5625	5.6108	5.4957	5.2501	5.3471	5.1977	5.3079	5.2767	5.1823	5.3998	5.1761	5.2391	5.0706	4.7034
metab_1364	C14:5n-1,3,5,7,9	C14H18O2	6.0808	-	4.8356	4.8805	4.8622	4.8551	4.8716	4.7529	4.8162	4.6977	4.7945	4.9497	5.0877	5.035	4.588	4.4921	4.6689	4.8762	4.8724	4.9683
metab_1365	2-[4-(2-methylprop-2-en-1-yl)phenyl]propanoic acid	C13H16O2	6.0808	-	4.5269	4.53	4.5248	4.2376	4.3232	4.1691	4.5119	4.296	4.3751	4.606	4.8237	4.7775	4.0889	3.968	4.2382	4.624	4.565	4.7222
metab_1370	6''-O-Malonylwistin	C26H26O13	6.0178	-	6.0286	5.9955	5.9769	5.8585	5.7742	5.6118	5.6927	6.0637	5.5115	6.0073	5.8881	5.7539	6.0475	5.9791	6.1916	5.3166	5.6208	6.0418
metab_1417	Ougenin	C17H16O6	5.4661	-	5.6194	5.6386	5.6204	5.3489	5.2612	4.816	4.8255	5.047	5.7615	5.8283	5.8881	5.5741	5.7828	6.0349	6.0326	5.229	5.5138	5.5354
metab_1420	6-{[3-(6,7-dimethoxy-2H-1,3-benzodioxol-5-yl)oxiran-2-yl]methoxy}-3,4,5-trihydroxyoxane-2-carboxylic acid	C18H22O12	5.4332	-	4.945	4.943	4.9643	4.5279	3.9831	4.8191	4.4965	5.3048	4.5499	4.567	4.3457	4.1317	5.379	4.9165	4.5675	3.7908	3.751	3.6633
metab_1433	Omega-Hydroxymoracin N	C19H18O5	5.2179	2-arylbenzofuran flavonoids	4.7357	4.7053	4.6798	4.7268	4.4599	4.9287	4.956	4.928	4.7725	4.7837	4.9145	4.5311	4.5174	4.6611	4.5852	4.5527	4.774	4.323
metab_1436	Morindaparvin A	C15H8O4	5.1225	-	7.036	7.0554	7.0361	7.0256	6.8417	7.0783	6.9163	6.7139	6.9755	6.8819	6.9706	6.9608	7.1336	7.0873	7.1419	6.9994	6.89	6.9491
metab_1437	5-(3',4',5'-Trihydroxyphenyl)-gamma-valerolactone	C11H12O5	5.1155	-	4.7547	4.7218	4.8235	4.5757	4.7328	5.0644	4.5204	3.8678	3.8226	3.3095	3.2877	5.2341	4.2046	3.5442	3.7441	4.8817	4.7825	4.8394
metab_1448	Indolylacryloylglycine	C13H12N2O3	4.9018	Carboxylic acids and derivatives	6.052	6.0448	6.0516	5.9567	5.5144	5.2878	6.3202	5.4537	5.5399	5.2392	5.5893	6.5687	6.2131	6.07	6.1632	5.9927	5.4235	5.035
metab_1466	Indolelactic acid	C11H11NO3	4.6135	Indoles and derivatives	5.8948	5.9054	5.9218	6.0939	5.9269	5.8931	5.9699	6.0257	5.6665	5.8634	5.9134	6.0709	5.9765	5.96	5.8696	5.7048	5.7667	5.4312
metab_1482	Felbamate monocarboxylate	C10H11NO4	4.2729	-	5.435	5.5068	5.4845	5.7103	5.8035	4.0602	4.4391	4.0615	4.3095	4.892	5.9436	5.6035	6.0578	6.0822	5.1696	5.9685	4.2795	4.3181
metab_1492	Glu Trp	C16H19N3O5	4.1114	-	5.7752	5.7733	5.7374	5.8202	5.4024	5.6352	5.6421	5.5964	5.6299	5.8746	5.8507	5.8658	5.8291	6.0152	5.6547	5.6812	6.0158	5.437
metab_1499	7-Isopropyl-5-methylbicyclo[2.2.2]oct-5-en-2-one	C12H18O	4.0612	Organooxygen compounds	4.6212	4.6423	4.6327	4.4905	4.4247	4.5429	4.6763	4.6586	4.67	4.6744	4.6112	4.7439	4.6846	4.528	4.7248	4.8054	4.5741	4.6246
metab_1500	Succinylcarnitine	C11H19NO6	4.0419	Fatty Acyls	4.6197	4.6125	4.5436	4.5722	5.089	4.9076	4.4401	4.7639	4.6228	4.3439	4.7418	4.3945	4.1904	4.6039	4.3929	3.9947	3.6423	4.1099
metab_1524	3R-aminononanoic acid	C9H19NO2	3.7304	-	5.4382	5.4418	5.4729	5.5359	5.7868	5.8446	5.2196	5.6633	5.5589	5.6023	5.3382	5.3551	5.1478	5.3804	5.4903	4.6643	4.8603	4.8586
metab_1525	Tyrosyl-Isoleucine	C15H22N2O4	3.7227	Carboxylic acids and derivatives	5.0364	5.0054	5.0268	5.4705	5.4045	5.1984	5.1348	5.0245	5.0887	5.2494	4.8183	4.9357	4.563	4.7008	4.6599	4.3997	4.7357	4.5499
metab_1540	4-{hydroxy[(3,4,5,6-tetrahydroxyoxan-2-yl)methoxy]methylidene}cyclohexa-2,5-dien-1-one	C13H16O8	3.5033	-	5.7629	5.7206	5.7313	5.2955	5.8575	5.5494	5.2511	5.3295	5.8967	5.7734	5.9394	6.1024	5.6993	5.4246	5.24	5.1865	5.4347	5.3526
metab_1560	Glycyl-Tryptophan	C13H15N3O3	3.2396	Carboxylic acids and derivatives	4.6827	4.55	4.6321	4.9366	4.9507	4.8848	4.9306	4.9267	4.8452	4.5156	4.3218	4.4786	4.2553	4.378	4.2823	4.2332	4.1993	4.0617
metab_1569	Rhamnocitrin 3-glucosyl-(1->2)-galactoside	C28H32O16	3.2113	-	4.987	4.9721	4.9479	4.901	4.1806	5.317	4.7622	4.2483	4.804	4.5949	4.8362	4.5198	5.311	5.3778	5.6539	4.4841	3.9033	4.4949
metab_1575	13-Oxo-9,11-tridecadienoic acid	C13H20O3	3.1134	Fatty Acyls	4.9664	4.9552	4.9752	5.097	5.0855	5.1111	5.1942	5.0892	5.0915	4.9017	4.8445	4.9816	4.8926	4.8968	4.7767	4.7837	4.8388	4.74
metab_1586	Phe-Asn-OH	C18H17N3O7	3.0069	-	4.7605	4.7066	4.6796	4.5959	4.5765	4.7084	4.2613	4.302	4.6825	4.3384	4.6078	4.9314	4.8611	4.939	5.1382	4.6588	4.651	4.5142
metab_1595	Cis-Zeatin 9-glucoside	C16H23N5O6	2.9196	-	5.5047	5.529	5.4875	5.329	5.3766	5.3943	5.3098	5.375	5.3593	5.5242	5.4872	5.6845	5.5042	5.4051	5.4755	5.3878	5.4941	5.392
metab_1597	N-ACETYLPROLINE	C7H11NO3	2.9196	Carboxylic acids and derivatives	5.5994	5.6579	5.6084	5.8207	5.6399	5.7524	5.4894	5.7495	5.3412	5.5789	5.4908	5.3576	5.4661	5.5619	5.3386	5.6359	5.6268	5.483
metab_1617	Pseudouridine	C9H12N2O6	2.8422	Nucleoside and nucleotide analogues	5.0373	5.0405	4.9804	5.5304	5.1211	5.3906	4.8966	4.7351	4.9983	5.3866	4.6029	5.2246	4.7355	4.554	4.8884	4.9342	5.2929	4.8044
metab_1620	Val Val	C10H20N2O3	2.8422	-	5.1067	5.1124	5.0741	5.5843	5.3558	5.3568	5.4133	5.2416	5.2992	5.0604	4.8543	4.9549	4.8413	4.9305	4.5848	4.7762	4.8009	4.6055
metab_1627	Pyridoxamine	C8H12N2O2	2.8352	Pyridines and derivatives	4.9221	4.9032	4.8827	3.9284	3.823	3.9399	4.1048	4.0332	4.1542	4.1266	4.1954	4.2017	3.9669	4.0414	4.0179	4.1245	4.1761	4.2547
metab_1649	Hydroxyprolyl-Valine	C10H18N2O4	2.5173	Carboxylic acids and derivatives	6.3481	6.3561	6.3501	6.5654	6.5395	6.4944	6.5518	6.3109	6.3477	6.3313	6.0432	6.2771	6.0993	6.2354	6.1231	6.2332	6.1994	6.2415
metab_1749	N-Nitroso-pyrrolidine	C4H8N2O	0.7887	Pyrrolidines	4.8294	4.8623	4.8692	4.6868	4.591	4.7402	4.852	4.8062	4.8681	4.9108	4.7634	4.6583	4.8467	4.8564	4.988	4.9155	5.0985	4.8032
metab_1750	Spermine	C10H26N4	0.7887	Organonitrogen compounds	4.8967	4.9384	4.9288	5.2239	5.4174	5.2344	5.1172	4.5159	4.987	5.199	4.2183	4.7478	4.1569	4.2428	3.9987	4.5363	5.0277	4.4956
metab_1820	4-Pyrimidine Methanamine (hydrochloride)	C5H7N3	0.9126	-	6.6259	6.6537	6.6377	6.8007	6.6827	6.577	6.772	6.4501	6.6074	6.7357	6.6643	6.7867	6.5496	6.5318	6.6161	6.7749	6.7926	6.4388
metab_1834	Argininosuccinic acid	C10H18N4O6	0.9607	Carboxylic acids and derivatives	6.8599	6.886	6.866	6.8366	6.7402	6.8062	6.7823	6.8547	6.7199	7.1158	6.9647	7.1228	6.805	6.6999	6.5701	6.9233	6.9579	6.9722
metab_1836	Glycerophosphocholine	C8H20NO6P	0.9677	Glycerophospholipids	7.1122	7.1355	7.1159	6.7208	6.8828	7.0096	7.0195	7.1081	6.9646	6.9627	7.2201	7.0592	7.1658	7.2272	7.1439	7.3564	7.3172	7.3929
metab_1837	A-L-Arabinofuranosyl-(1->2)-[a-D-mannopyranosyl-(1->6)]-D-mannose	C17H30O15	0.9677	Organooxygen compounds	5.3477	5.4255	5.3414	5.5981	5.6433	5.644	5.6601	5.4534	5.4269	5.5024	5.3527	5.4665	4.6252	5.3412	5.2761	5.5521	5.5513	5.3312
metab_1838	Kaempferol 3-[2''-(p-coumaroylglucosyl)rhamnoside]	C36H36O17	0.9746	-	6.7727	6.7369	6.7458	5.9151	5.2499	6.3099	4.7531	5.3569	4.7813	6.141	6.4878	6.5751	6.9263	6.7352	6.9852	7.144	6.9051	6.8603
metab_1848	Glycyl-Threonine	C6H12N2O4	1.0022	Carboxylic acids and derivatives	4.8854	4.7849	4.8425	5.2107	5.6959	4.8557	5.0377	4.9289	5.2074	4.3221	4.8308	5.153	5.2051	4.8211	4.9541	4.0354	4.3296	4.6218
metab_1868	6-(4-{3,7-dihydroxy-4-[3,5,7-trihydroxy-2-(3-hydroxyphenyl)-3,4-dihydro-2H-1-benzopyran-8-yl]-3,4-dihydro-2H-1-benzopyran-2-yl}-2-hydroxyphenoxy)-3,4,5-trihydroxyoxane-2-carboxylic acid	C36H34O16	1.1613	-	6.377	6.3784	6.346	5.845	6.1642	6.0666	6.332	6.3682	6.427	6.5683	6.1747	6.3672	6.2291	6.2779	6.1781	6.2789	6.4442	6.3882
metab_1871	2(5H)-Furanone	C4H4O2	1.2169	Dihydrofurans	6.6214	6.6656	6.6314	6.2426	6.3488	6.3615	6.4497	6.6085	6.5526	6.666	6.6996	6.6565	6.7849	6.7208	6.7292	6.7998	6.761	6.8425
metab_1878	Pyrrolidine	C4H9N	1.2725	Pyrrolidines	5.9598	5.9975	5.969	6.212	6.0739	6.2237	6.2879	6.0142	6.0482	6.2041	5.8672	5.9767	5.8201	5.8677	5.805	5.9045	5.9585	6.0054
metab_1893	5-delta-Hydroxybutyl Hydantoin	C7H12N2O3	1.3421	-	5.0657	5.1813	4.957	5.1048	5.2173	5.0971	5.2708	5.2079	4.6134	4.9275	4.6396	4.7352	4.3418	4.8642	4.5212	4.5282	4.5696	5.0659
metab_1908	Cytosine	C4H5N3O	1.4257	Diazines	5.7252	5.7343	5.7245	5.9916	5.9408	5.9217	5.9971	5.975	5.8406	5.8845	5.7077	5.6996	5.546	5.6536	5.7657	5.3189	5.5544	5.4256
metab_1915	Nalpha-Acetyl-L-arginine	C8H16N4O3	1.4535	-	4.6308	4.614	4.6219	5.5195	4.9483	5.1897	3.583	4.2962	3.6112	4.0914	4.1663	4.2257	4.8757	4.3308	4.4755	3.5276	4.3147	3.8802
metab_1927	2-{[3-(4-hydroxy-3-methoxyphenyl)prop-2-enoyl]oxy}-3-(sulfooxy)butanedioic acid	C14H14O12S	1.6422	-	5.9584	5.9556	5.9409	6.4225	6.3665	6.2542	6.3423	6.0469	6.2067	6.1298	5.5011	5.9515	5.6009	5.7957	5.5108	5.3153	5.7818	5.4802
metab_1932	6-Methylthiopurine 5'-monophosphate ribonucleotide	C11H15N4O7PS	1.677	-	5.6926	5.6822	5.678	6.0986	6.0816	5.9535	6.0679	5.8032	5.9957	5.8981	5.2956	5.6646	5.3349	5.5213	5.3504	5.1679	5.564	5.257
metab_1933	Val Glu	C10H18N2O5	1.6842	-	5.2474	5.2892	5.2579	5.6067	5.4921	5.5735	5.4162	5.2958	5.3714	5.3505	5.1173	5.1998	5.1046	5.2292	4.9587	5.002	4.9379	4.9424
metab_1952	Prolylhydroxyproline	C10H16N2O4	1.9642	Carboxylic acids and derivatives	4.8653	4.8425	4.8561	3.7194	3.4449	3.2994	5.3179	3.9138	5.1962	3.2571	4.622	4.3549	4.6705	5.072	4.5376	5.1121	3.186	3.4101
metab_1963	His Leu	C12H20N4O3	2.0553	-	5.4118	5.3968	5.3991	5.6544	5.6128	5.5163	5.644	5.5888	5.4859	5.4376	5.4201	5.3526	5.159	5.3493	5.2945	5.1797	5.321	5.0523
metab_1989	8-hydroxymirtazapine	C17H19N3O	2.3003	Piperazinoazepines	6.0458	6.0564	6.0399	6.0176	5.6088	5.8619	5.2225	5.7145	5.9518	5.9315	6.0603	5.9947	6.1508	6.0944	6.0504	6.2298	6.1752	6.2164
metab_1990	Cysteinyl-Threonine	C7H14N2O4S	2.3143	Carboxylic acids and derivatives	7.0172	7.0345	7.0172	6.7971	6.5822	6.854	6.5037	6.619	6.6796	6.879	7.2064	6.9583	7.2214	7.1797	6.8848	6.9391	7.0383	7.1404
metab_2000	Cytidine 2',3'-cyclic phosphate	C9H12N3O7P	2.4473	-	4.9852	4.9304	4.9231	5.5141	5.4053	5.4187	5.4289	5.2771	5.3262	4.715	4.5952	4.6702	3.7885	3.9991	4.6943	3.7415	3.7374	3.7258
metab_2015	(5R)-5-Hydroxyhexanoic acid	C6H12O3	2.5314	Fatty Acyls	4.7406	4.7604	4.7409	5.0569	4.943	5.0331	4.6465	4.583	4.5706	4.6068	4.5138	4.631	4.5057	4.5546	4.6031	4.5764	4.6196	4.4911
metab_2019	GDP-L-fucose	C16H25N5O15P2	2.5454	Purine nucleotides	4.7592	4.815	4.7364	5.1646	5.0221	5.134	5.3604	4.9426	4.9271	4.6186	4.1631	4.3766	4.0907	4.263	4.6265	3.571	3.8593	3.5553
metab_2024	Isoxanthopterin	C6H5N5O2	2.5664	Pteridines and derivatives	4.5201	4.5263	4.4959	4.4924	4.553	4.6011	4.3316	4.2984	4.3523	4.4033	4.4758	4.5934	4.5567	4.4545	4.5055	4.5844	4.489	4.6601
metab_2028	Isoleucyl-Threonine	C10H20N2O4	2.5734	Carboxylic acids and derivatives	4.6027	4.6113	4.6214	5.0662	4.8441	4.9109	4.817	4.7279	4.7277	4.4778	4.5017	4.3575	4.3458	4.3794	4.1636	4.2133	4.2152	4.204
metab_2038	Carbamazepine iminoquinone	C14H9NO	2.6022	Benzazepines	3.861	3.7123	3.8087	2.488	2.4606	2.4828	2.4292	2.4658	2.5725	3.7887	2.4189	2.6851	3.5179	3.9831	3.7738	2.374	4.2098	4.0549
metab_2040	D-4'-Phosphopantothenate	C9H18NO8P	2.6199	-	4.0685	4.0073	4.124	1.6014	3.0845	1.5959	1.5435	2.3645	2.3695	4.3768	4.2469	4.0433	3.5012	3.9105	1.9446	4.8792	3.8495	4.1397
metab_2043	4-Hydroxybenzylamine	C7H9NO	2.6239	Benzene and substituted derivatives	4.2674	4.1926	4.2189	3.5336	3.5938	3.5625	3.3306	3.5295	3.5905	4.5347	3.7259	3.7518	3.8769	4.0341	4.0625	3.988	4.9719	4.8017
metab_2046	Arg Leu	C12H25N5O3	2.629	-	5.4486	5.4109	5.4288	5.7532	5.7116	5.5713	5.7633	5.6605	5.5725	5.277	5.2723	5.2477	5.0261	5.2036	5.2477	5.0582	5.1054	4.8659
metab_2059	Adenosine	C10H13N5O4	2.6649	Purine nucleosides	6.3691	6.3209	6.3428	5.8941	5.7143	5.5578	5.975	6.1254	6.4881	6.148	5.8934	6.4263	6.4112	6.713	6.3574	6.2736	6.2815	6.5343
metab_2062	Cyclocalopin B	C19H26O8	2.6719	Furopyrans	5.3601	5.2823	5.2793	4.8035	5.1066	4.9367	5.506	5.3576	5.5234	5.4154	5.2213	5.248	5.3081	5.1663	5.1836	5.4603	5.305	5.1312
metab_2063	Threoninyl-Leucine	C10H20N2O4	2.677	Carboxylic acids and derivatives	4.6539	4.6059	4.6094	4.7158	4.4314	4.6049	4.8026	4.7404	4.6814	4.4746	4.6043	4.4799	4.5626	4.3419	4.2738	4.5416	4.587	3.7783
metab_2066	Lycoperdic acid	C8H11NO6	2.677	Carboxylic acids and derivatives	4.8059	4.7627	4.7016	5.1545	4.8618	4.7789	4.9345	4.6096	4.4279	5.0097	4.2342	4.7694	4.3462	4.5363	4.2843	4.2288	4.3001	4.5454
metab_2068	Asp Met	C9H16N2O5S	2.6907	-	4.7962	4.796	4.7996	5.1733	4.9821	4.7685	4.5873	4.6372	4.7176	4.8814	4.5785	4.8959	4.5494	4.6973	4.5864	4.7313	4.7009	4.7074
metab_2094	(S)-Isowillardiine	C7H9N3O4	2.7296	Carboxylic acids and derivatives	4.2277	4.2254	4.2428	4.307	4.3697	4.3951	4.2469	4.1375	4.3186	4.3076	4.1184	4.3365	3.799	3.8671	3.9713	3.9261	4.2415	3.8701
metab_2103	(1R,2R,4S)-p-Menthane-1,2,8-triol 8-glucoside	C16H30O8	2.7558	Organooxygen compounds	4.8353	4.7206	4.8003	4.1089	4.0392	3.9897	4.8855	4.8265	4.9425	4.5803	5.1369	4.6752	4.8595	4.5644	4.7672	4.8535	4.7289	4.415
metab_2130	Xanthine	C5H4N4O2	2.8211	Imidazopyrimidines	4.567	4.6243	4.6263	4.6825	4.4804	4.5466	4.5119	4.6273	4.6829	4.6426	4.6795	4.652	4.4094	4.4469	4.5867	4.3614	4.7119	4.7468
metab_2132	Ile Ala	C9H18N2O3	2.8211	-	4.788	4.8066	4.8377	5.242	4.9944	5.0581	5.0305	4.8333	4.9096	4.6459	4.6311	4.6023	4.5776	4.5948	4.3849	4.6269	4.525	4.509
metab_2142	Dioscoretine	C13H23NO3	2.8352	Fatty Acyls	4.6053	4.722	4.7169	5.0785	5.1985	5.0928	4.7976	4.6784	4.6663	4.8352	4.6468	4.433	3.9298	4.4102	4.3557	3.7304	4.5824	4.268
metab_2145	Isoleucyl-Serine	C9H18N2O4	2.8422	Carboxylic acids and derivatives	4.763	4.7335	4.706	3.6143	5.0434	3.4287	4.0922	4.1872	3.669	5.3643	4.762	4.2812	3.9726	3.2578	3.6165	3.6035	5.1351	4.9988
metab_2146	(2R,2'S)-Isobuteine	C7H13NO4S	2.8422	-	4.9823	4.9915	5.0073	4.636	4.4864	4.6707	4.9343	4.9434	4.9068	4.5377	4.8163	4.8197	5.128	5.0546	5.0525	5.2779	4.8114	5.2878
metab_2147	Margrapine B	C22H25NO7	2.8422	Quinolines and derivatives	5.1693	5.2026	5.1287	5.4919	5.4605	5.5596	4.2065	4.5859	4.8005	5.0909	4.92	4.9343	5.0104	4.9298	4.8024	5.2173	5.1447	5.3006
metab_2156	6-[(6-carboxy-3,4,5-trihydroxyoxan-2-yl)oxy]-2H-1,3-benzodioxole-5-carboxylic acid	C14H14O11	2.8491	-	5.6859	5.6457	5.6615	5.4848	5.1456	5.2864	5.6993	5.6241	5.965	5.9096	5.4178	5.6951	5.81	5.7576	5.8744	5.9163	5.7568	5.1761
metab_2163	3,4,5-trihydroxy-6-{[4-hydroxy-5-(3-hydroxyphenyl)pentanoyl]oxy}oxane-2-carboxylic acid	C17H22O10	2.8631	-	4.2141	4.2369	4.2633	3.2285	3.2231	3.9255	4.5829	4.4416	3.9284	0.1161	3.213	0.8013	4.8053	4.9016	4.6068	3.7035	3.2889	4.3108
metab_2164	Hydroxyprolyl-Glutamate	C10H16N2O6	2.8631	Carboxylic acids and derivatives	4.7026	4.7094	4.7798	4.7137	5.0304	4.6019	4.8512	4.4802	4.7401	4.7794	4.4084	4.5208	4.6985	4.5925	4.188	5.1843	5.0035	4.9855
metab_2165	Neryl rhamnosyl-glucoside	C22H38O10	2.8702	Prenol lipids	4.7453	4.6546	4.6958	4.9369	4.3244	4.6923	3.9301	3.9558	4.2794	4.5143	4.8518	4.5667	5.0067	4.7074	4.6553	4.5323	4.3763	4.847
metab_2166	6-(2-{12,12-dimethyl-4-oxo-3,11,14-trioxatetracyclo[8.5.0.0?,?.0??,??]pentadeca-1(10),2(7),5,8-tetraen-5-yl}-5-methoxyphenoxy)-3,4,5-trihydroxyoxane-2-carboxylic acid	C27H26O12	2.8702	-	4.0844	4.0329	4.2335	4.8079	3.6889	4.6824	4.8609	4.1532	4.5582	3.62	4.5171	4.6237	4.9992	5.0819	5.3505	4.5563	3.1144	3.961
metab_2167	D-Pantetheine 4'-phosphate	C11H23N2O7PS	2.8772	-	4.541	4.5616	4.568	4.7245	4.198	4.9331	4.3482	4.7296	5.0133	3.4838	4.5598	4.5499	4.5995	4.6071	4.6843	3.8414	4.2833	4.177
metab_2170	Ser Leu	C9H18N2O4	2.8842	-	5.0025	5.0591	4.9935	5.2791	5.2317	5.1695	5.0948	5.0565	5.0493	5.0423	5.0118	4.9598	4.7655	4.9511	4.8611	4.7892	4.8798	4.8927
metab_2186	6-(4-ethyl-2-hydroxyphenoxy)-3,4,5-trihydroxyoxane-2-carboxylic acid	C14H18O8	2.912	-	4.8247	4.8401	4.7998	4.5388	4.5768	4.485	4.6405	4.5392	4.711	4.7082	4.9014	4.7607	4.815	4.7421	4.91	4.743	4.7955	4.9482
metab_2198	3,4,5-trihydroxy-6-{[2-(3-hydroxyphenyl)acetyl]oxy}oxane-2-carboxylic acid	C14H16O9	2.9413	-	5.5897	5.5431	5.5437	5.6728	5.8553	5.6165	5.2558	5.6002	5.3729	5.1931	5.4471	5.3491	5.9182	5.1245	5.1915	5.1221	4.9799	5.2027
metab_2220	Hydroxypentobarbital	C11H18N2O4	3.0105	-	4.7051	4.6633	4.6693	5.0007	4.9281	4.8942	5.0532	4.9832	4.8994	4.5791	4.5249	4.6029	4.293	4.5481	4.4966	4.3357	4.2843	4.0188
metab_2225	Trp Asp	C15H17N3O5	3.0282	-	4.6777	4.6636	4.659	4.9642	4.7725	4.9381	4.7573	4.5775	4.7222	4.7147	4.7177	4.6593	4.3732	4.5964	4.4568	4.4855	4.5711	4.2899
metab_2234	ALANYL-dl-LEUCINE	C9H18N2O3	3.0523	-	5.5265	5.5438	5.524	5.9562	5.8272	5.7636	5.8559	5.7094	5.7283	5.4985	5.386	5.403	5.1277	5.375	5.1413	5.3432	5.2244	5.0642
metab_2238	Thr Leu	C10H20N2O4	3.0645	-	5.3508	5.3415	5.3432	5.7335	5.6941	5.5703	5.5962	5.514	5.4666	5.3339	5.2308	5.2487	5.0064	5.2484	5.1368	4.9661	5.0063	4.877
metab_2248	Lysyl-Threonine	C10H21N3O4	3.1328	Carboxylic acids and derivatives	5.2817	5.2017	5.2469	5.7378	5.6579	5.6651	5.4839	5.3234	5.3819	5.1784	5.2895	4.8455	4.571	4.9607	5.1207	4.1075	4.9127	4.6821
metab_2252	N-butyryl-L-Homocysteine thiolactone	C8H13NO2S	3.1388	-	4.1021	4.0163	4.0428	3.9796	3.619	3.6125	3.1033	3.1358	3.4732	4.0771	4.1087	4.277	3.923	4.0239	3.5379	4.0998	3.7267	4.6439
metab_2258	Trp Glu	C16H19N3O5	3.1526	-	4.4667	4.3531	4.4695	4.9619	4.7255	4.7783	4.6055	4.4799	4.5063	4.4645	4.3154	4.3612	4.2472	4.4122	4.0584	4.0699	4.227	3.9977
metab_2270	Valyl-Proline	C10H18N2O3	3.1879	Carboxylic acids and derivatives	4.4784	4.4291	4.4729	3.3803	3.5192	3.1626	3.2588	2.6836	3.6745	4.028	3.7208	3.6718	2.895	3.7326	2.6165	2.5203	3.8188	5.2311
metab_2274	Fucosyllactose	C18H32O15	3.199	Organooxygen compounds	4.9227	4.9294	4.8978	4.7962	5.1727	3.1922	3.1385	3.1751	3.1666	3.1499	5.5888	4.8338	5.5304	5.569	4.2623	5.3155	3.0789	3.0673
metab_2275	Asn Phe	C13H17N3O4	3.2077	-	4.6368	4.5721	4.5962	4.9956	4.9369	4.8082	4.8961	4.8482	4.7927	4.6245	4.4061	4.4578	4.1042	4.3856	4.2956	4.2228	4.2832	4.0144
metab_2279	Val Leu	C11H22N2O3	3.2184	-	5.3063	5.2404	5.2762	5.7659	5.5771	5.5696	5.5358	5.5185	5.4909	5.1529	5.0464	5.0676	4.9419	5.0263	4.7831	4.859	4.8963	4.7365
metab_2280	Ile Met	C11H22N2O3S	3.2184	-	4.2935	4.222	4.2695	4.9678	4.5938	4.6777	4.5429	4.5301	4.3892	4.1848	3.8752	3.8654	3.8392	3.7415	3.3118	3.835	3.6834	3.6144
metab_2284	Wyerol	C15H16O4	3.2325	Fatty Acyls	3.704	3.7386	3.7878	3.7363	2.5332	3.0908	4.3776	3.4185	2.4946	1.484	2.4432	3.8114	3.7561	4.1871	4.0207	2.9312	2.4672	1.5964
metab_2309	Fukinolic acid	C20H18O11	3.311	Cinnamic acids and derivatives	4.537	4.7488	4.7245	4.0548	3.9864	4.2063	4.1115	3.9916	4.2534	3.9664	4.5398	4.0247	5.1494	5.0173	5.0733	3.9372	4.3636	5.2171
metab_2310	Thr Phe	C13H18N2O4	3.3179	-	5.0542	5.1126	5.0656	5.4931	5.5236	5.4177	5.304	5.1413	5.2097	5.0905	4.8171	4.8713	4.4872	4.9428	4.4973	4.4615	4.5317	4.3508
metab_2333	O-Desmethylcarvedilol	C23H24N2O4	3.3998	Indoles and derivatives	5.5064	5.4656	5.5057	5.1621	5.1056	5.564	5.5458	5.1557	5.2271	5.2154	5.4681	5.443	5.8473	5.5766	5.8759	5.062	4.7137	5.4275
metab_2341	Val Ile	C11H22N2O3	3.4345	-	5.3981	5.3981	5.4069	5.9097	5.7712	5.697	5.7391	5.5791	5.5972	5.2354	5.1292	5.1531	5.0015	5.1159	4.8889	4.9856	4.9123	4.7085
metab_2351	Pro Phe	C14H18N2O3	3.4543	-	5.365	5.3537	5.3634	5.598	5.6668	5.6285	5.5839	5.412	5.3058	5.2456	5.117	5.2403	4.9794	5.1918	5.0519	5.0427	5.0882	5.0026
metab_2360	N-Butylscopolamine metabolite	C12H21NO2	3.4988	-	4.6324	4.6364	4.5974	4.8054	5.0038	5.0609	4.3217	4.5736	4.5143	4.5398	4.6306	4.4116	4.1846	4.5469	4.6922	3.8342	3.9508	3.934
metab_2363	P-Salicylic acid	C7H6O3	3.5033	Benzene and substituted derivatives	5.3882	5.3978	5.3544	5.016	5.4786	5.2417	5.0095	5.1182	5.5423	5.4431	5.5794	5.708	5.3689	5.1746	5.0125	4.9678	5.1862	5.1426
metab_2367	3,4,5-trihydroxy-6-{[2-(2-hydroxypropan-2-yl)-7-oxo-2H,3H,7H-furo[3,2-g]chromen-9-yl]oxy}oxane-2-carboxylic acid	C20H22O11	3.5443	-	4.4651	4.4275	4.5562	3.7769	3.9097	4.1794	3.8488	4.1351	4.1904	3.5558	4.5137	4.3563	5.1132	4.7036	4.6988	3.2574	4.0797	4.0471
metab_2375	CL(8:0/8:0/15:0/18:2(9Z,11Z))	C58H108O17P2	3.5723	Glycerophospholipids	5.3998	5.3385	5.3625	5.5397	5.5122	5.6374	4.9761	4.6846	5.2311	5.4066	5.318	5.5174	5.116	4.7867	4.8553	5.0518	5.2657	5.1286
metab_2383	Trans-Zeatin riboside	C15H21N5O5	3.6297	Purine nucleosides	4.4041	4.369	4.356	4.8709	4.777	4.5277	4.5395	4.558	4.3937	4.6527	4.4595	4.3159	3.7842	3.3649	4.6108	3.3123	3.7913	3.6306
metab_2384	Ser Trp	C14H17N3O4	3.6362	-	4.9855	4.9461	4.939	5.2146	5.2045	5.1731	5.0039	5.0101	4.9708	5.0053	5.0279	4.9599	4.8355	4.8298	4.9068	4.7642	4.9001	4.7803
metab_2387	2-amino-4-({1-[(carboxymethyl)-C-hydroxycarbonimidoyl]-2-[(2-hydroxy-2-methyl-3-oxo-1-phenylbutyl)sulfanyl]ethyl}-C-hydroxycarbonimidoyl)butanoic acid	C21H29N3O8S	3.6435	-	5.5135	5.4657	5.4465	4.9857	5.2861	5.352	5.6348	5.6412	5.14	5.8885	5.5535	5.6204	5.4916	5.5139	5.6635	5.4265	5.5312	5.1188
metab_2394	3,4,5-trihydroxy-6-({5-hydroxy-11-methoxy-16,18-dioxo-6,8,19-trioxapentacyclo[10.7.0.0?,?.0?,?.0??,??]nonadeca-1(12),2(9),10,13(17)-tetraen-14-yl}oxy)oxane-2-carboxylic acid	C23H22O14	3.6795	-	4.5879	4.5891	4.5612	4.8509	3.8817	5.1337	4.1837	5.2719	4.5746	4.3263	3.5016	4.7477	3.0722	4.5912	4.0049	3.2571	3.0211	3.0095
metab_2404	Acetylagmatine	C7H16N4O	3.7167	-	3.4359	3.483	3.5427	1.6398	4.3671	3.0122	2.2733	1.6181	3.1932	3.0483	3.0376	4.4573	3.409	1.9152	4.5223	1.5284	1.6167	1.9023
metab_2411	Ser Val Val Thr	C17H32N4O7	3.7375	-	5.175	5.1508	5.1745	5.6606	5.6983	5.5323	5.224	5.0672	5.3369	4.8062	5.2033	4.9384	4.2982	4.7589	4.6825	3.679	4.5708	4.236
metab_2439	3,4,5-trihydroxy-6-{[3-(4-methoxyphenyl)oxiran-2-yl]methoxy}oxane-2-carboxylic acid	C16H20O9	3.8674	-	4.8379	4.8151	4.7945	4.7506	5.2048	4.624	5.0372	5.1145	4.8499	4.9179	4.7913	4.9554	4.5613	4.7738	4.4343	4.6806	4.4607	4.6041
metab_2440	4-{1-hydroxy-3-[4-hydroxy-2-methoxy-3-(3-methylbut-2-en-1-yl)phenyl]propyl}benzene-1,2-diol	C21H26O5	3.872	-	5.0009	4.988	4.9536	5.2583	5.2479	5.4524	5.2104	4.9003	5.0856	4.761	4.8715	4.8787	4.6804	4.8876	4.9402	4.3993	4.5142	4.5078
metab_2454	3,4,5-trihydroxy-6-[(2,4,5-trihydroxy-6-{[hydroxy(4-oxocyclohexa-2,5-dien-1-ylidene)methoxy]methyl}oxan-3-yl)oxy]oxane-2-carboxylic acid	C19H24O14	3.9238	-	4.6029	4.5482	4.566	4.2484	3.6546	3.4418	3.1664	4.3628	4.4893	4.287	4.5345	4.7355	5.4527	4.6502	4.5944	4.1067	3.8735	3.6484
metab_2456	Ile Leu	C12H24N2O3	3.9423	-	5.162	5.1568	5.1433	5.8205	5.5669	5.5781	5.4724	5.4058	5.3261	4.9736	4.8111	4.8918	4.7289	4.8343	4.5044	4.6578	4.5256	4.4094
metab_2469	Trp-P-1	C13H13N3	3.9901	Indoles and derivatives	4.8257	4.8491	4.8202	4.6856	4.7122	4.5235	4.4303	4.7324	4.4421	4.4424	4.4994	4.5593	4.9752	4.7221	4.9761	5.3091	5.0842	5.1146
metab_2477	8-Isoquinoline methanamine (hydrochloride)	C11H11N	4.0138	-	4.2828	4.2829	4.2411	4.5083	4.3668	4.4088	4.283	4.3088	4.2122	4.2507	4.206	4.2539	4.2309	4.2931	4.2195	4.2103	4.305	4.2159
metab_2489	Val Trp	C16H21N3O3	4.045	-	4.8736	4.8565	4.822	5.362	4.9647	5.2011	5.0245	4.8218	4.9507	4.7084	4.6003	4.6417	4.5951	4.6288	4.2415	4.3307	4.2892	4.1767
metab_2498	Lys Val Val Gly	C18H35N5O5	4.0815	-	3.7074	3.9495	3.7773	2.8153	3.0689	2.8102	2.7565	2.8977	2.7846	2.8058	4.0369	3.2625	2.748	3.2364	3.3753	3.8583	3.784	3.8152
metab_2511	7-CHLOROETHYLTHEOPHYLLINE	C9H11ClN4O2	4.1548	-	5.1917	5.223	5.2017	5.153	5.1236	5.0573	5.125	5.0824	4.8673	5.0284	4.9816	5.0945	5.4565	5.2677	5.5158	4.6378	4.7963	5.093
metab_2524	L-4-Hydroxy-3-methoxy-a-methylphenylalanine	C11H15NO4	4.2202	-	4.0334	4.1133	3.9881	3.1103	2.7383	3.2959	3.5361	3.1015	3.4283	3.4958	2.343	4.0434	4.622	4.768	4.7498	3.1879	3.3742	3.3142
metab_2529	4-Methylumbelliferyl beta-D-glucuronide	C16H16O9	4.2289	-	5.3369	5.3657	5.3276	5.5515	5.0762	5.7849	5.495	5.3681	5.6749	4.8827	5.3631	5.4235	5.1538	5.3185	5.242	5.2058	5.1102	5.1816
metab_2566	Melanostatin	C13H24N4O3	4.376	Carboxylic acids and derivatives	4.806	4.7693	4.7786	5.2205	5.2138	5.073	4.9527	4.7846	4.9063	4.9375	4.8622	4.3591	4.2125	4.3947	4.7893	3.909	4.6925	4.5704
metab_2567	Leptophylloside	C20H24O10	4.3806	Coumarins and derivatives	4.5745	4.4126	4.4905	2.8545	2.7857	3.4524	4.2484	3.772	4.2532	3.0721	4.0749	4.3958	5.0779	5.0652	4.6382	2.7604	4.1263	3.082
metab_2568	Deoxycytidine	C9H13N3O4	4.3841	Pyrimidine nucleosides	3.0722	2.7382	3.008	2.9381	2.788	3.363	3.0128	2.7271	2.5521	2.4841	2.3993	2.7422	2.8072	3.0795	4.7032	2.4092	2.3504	2.4387
metab_2574	2-(3-hydroxyphenyl)-6-[3,4,5-trihydroxy-6-(hydroxymethyl)oxan-2-yl]-3,4-dihydro-2H-1-benzopyran-3,5,7-triol	C21H24O10	4.4326	-	5.2891	5.3097	5.3456	5.3646	5.1606	5.2257	5.1815	4.9784	4.8913	5.2614	5.3191	5.3335	5.5262	5.2814	5.4604	4.6912	4.5269	4.9144
metab_2595	Lespedeol C	C17H16O6	4.5427	-	4.955	4.8951	4.8853	4.8242	4.773	4.5297	3.808	4.0525	5.2227	4.5902	5.2407	5.2255	5.024	5.0943	5.1627	4.8634	5.072	4.2068
metab_2612	5,7,3',4',5'-Pentahydroxyflavanone	C15H12O7	4.5995	-	4.2463	4.3081	4.3294	4.3263	3.8387	4.0242	3.0399	3.0766	3.8324	4.8557	4.5118	4.2642	4.1548	4.5103	4.7803	3.7764	4.0722	3.4749
metab_2622	8-iso-15-keto-PGE2	C20H30O5	4.6484	Fatty Acyls	4.6206	4.5873	4.6599	4.7634	4.6923	5.1105	4.7928	4.7235	4.6054	4.8104	4.6512	4.4458	4.2931	4.6198	4.6567	4.1131	4.17	4.1431
metab_2624	3-phenyl-1-[2,4,6-trihydroxy-3-(4-hydroxy-3,7-dimethylocta-2,6-dien-1-yl)phenyl]propan-1-one	C25H30O5	4.6576	-	4.9428	4.9457	5.0393	5.0872	5.1461	5.4616	5.3073	5.1708	4.9403	5.0342	4.8685	4.7677	4.4452	5.0137	5.0302	4.2299	4.6776	4.1643
metab_2629	Dukunolide D	C26H28O8	4.6815	Naphthopyrans	4.2888	4.1989	4.2657	5.251	4.2447	4.0371	4.2996	4.08	4.2334	3.9468	4.0811	3.1885	3.4846	3.8157	3.2706	3.8162	4.1439	4.0357
metab_2633	Methyl (3x,10R)-dihydroxy-11-dodecene-6,8-diynoate 10-glucoside	C19H26O9	4.6958	Fatty Acyls	3.9921	3.9544	4.0746	5.2347	2.9646	4.7018	3.7398	4.2112	1.162	2.8237	1.7967	2.9868	3.844	2.7218	3.3717	1.0275	1.0237	1.0132
metab_2652	Erythroskyrin	C26H33NO6	4.7889	Furofurans	4.7846	4.7543	4.8128	0.731	2.3215	2.2584	0.6836	3.3286	0.7061	0.6927	0.6754	0.6786	4.2559	5.6511	6.1102	0.6402	0.637	0.6282
metab_2667	3,4,5-trihydroxy-6-[2-(methoxymethyl)-5-(3,5,6,7-tetrahydroxy-3,4-dihydro-2H-1-benzopyran-2-yl)phenoxy]oxane-2-carboxylic acid	C23H26O13	4.8907	-	5.7883	5.7487	5.7791	5.7552	5.4111	5.7567	5.4756	5.3514	5.7362	5.618	5.6433	5.4608	5.8296	5.8265	5.8955	5.6495	5.5499	5.6354
metab_2674	3,4,5-trihydroxy-6-{[7-hydroxy-2-(3-hydroxyphenyl)-3-[(3,4,5-trihydroxyoxan-2-yl)oxy]-8aH-chromen-5-yl]oxy}oxane-2-carboxylic acid	C26H28O15	4.9251	-	5.1711	5.1627	5.1444	5.0707	4.7559	4.5858	4.9447	5.4281	4.9674	5.2839	5.0458	5.005	5.199	5.021	5.3156	4.6445	4.9003	4.937
metab_2675	Genistein 4'-O-glucoside	C21H20O10	4.9388	-	4.5084	4.4852	4.5088	4.2958	4.0982	4.2593	4.0748	4.3302	4.2071	4.4874	4.3814	4.4834	4.4009	4.7288	4.5562	4.0564	4.3564	4.405
metab_2681	2-(3-Carboxy-3-(methylammonio)propyl)-L-histidine	C11H19N4O4+	4.967	Carboxylic acids and derivatives	4.6191	4.5716	4.6406	5.1342	5.2577	4.9407	4.4353	4.588	5.2638	4.2269	4.1317	4.8352	3.5144	3.257	3.9789	2.0673	2.9758	1.5233
metab_2682	7-Hydroxy-6,8-di-C-methylflavanone 7-O-arabinoside	C22H24O7	4.9701	-	4.8881	4.8855	4.8723	4.6772	3.3084	5.1374	4.6881	4.5853	5.0207	4.53	4.7477	4.8193	5.1945	5.1991	5.2106	4.8761	4.3914	4.3452
metab_2695	N-Acetyl-DL-tryptophan	C13H14N2O3	5.0396	-	4.0309	4.0516	4.1091	4.7066	4.4898	4.537	3.78	3.984	3.8912	3.9264	3.715	3.7225	3.9082	3.8031	3.8374	3.4788	4.1585	2.621
metab_2702	7-hydroxy-3-(3-hydroxyphenyl)-4H-chromen-4-one	C15H10O4	5.0616	-	4.5586	4.5785	4.5716	4.5983	4.345	4.578	4.2068	4.3237	4.4998	4.4443	4.4243	4.4717	4.8394	4.761	4.779	4.513	4.2578	4.4043
metab_2706	Tyr Phe Gly Ser	C23H28N4O7	5.0901	-	4.4675	4.4969	4.5004	2.9869	3.2841	3.1715	4.5411	4.338	4.3459	4.4879	4.9647	4.8914	4.2566	4.0415	3.7419	4.5635	4.4676	4.3982
metab_2708	Merodesmosine	C18H34N4O6	5.103	Carboxylic acids and derivatives	4.9209	4.9594	5.0337	5.5135	5.3036	5.3101	5.2542	4.9437	5.0732	4.9454	5.2287	4.7254	3.5339	4.6947	4.7549	3.5179	4.8064	4.3715
metab_2719	3b,8b-Dihydroxy-6b-(3-chloro-2-hydroxy-2-methylbutanoyloxy)-7(11)-eremophilen-12,8-olide	C20H29ClO7	5.1356	Prenol lipids	4.3791	4.4315	4.3716	3.1715	4.3473	3.3834	3.9995	3.1493	4.197	3.6813	4.6359	4.34	4.6414	4.099	4.4442	4.7733	4.6151	4.7511
metab_2720	6-Demethylvignafuran	C15H12O4	5.1406	-	4.2778	4.362	4.3054	4.4973	4.1098	4.3435	4.301	4.3041	4.1656	4.0945	4.2566	4.2616	4.7996	4.5681	4.3221	3.9414	3.9803	3.9948
metab_2722	3,4,5-trihydroxy-6-[2-(3-hydroxyprop-1-en-1-yl)phenoxy]oxane-2-carboxylic acid	C15H18O8	5.1471	-	4.7001	4.7015	4.7067	5.0027	5.1631	4.7454	4.6293	4.847	4.7167	4.7773	4.2754	4.9305	4.3753	4.2672	4.1361	4.3136	4.4847	4.3572
metab_2727	2-[(4-hydroxyphenyl)methylidene]-2,3-dihydro-1-benzofuran-3,6-diol	C15H12O4	5.1586	-	5.2678	5.2482	5.2345	5.2161	4.8233	5.1883	4.7956	5.0504	5.0334	5.3186	5.3008	5.0274	5.5587	5.6488	5.6684	5.0005	4.9369	4.5347
metab_2729	Val Tyr Arg Phe	C29H41N7O6	5.1646	-	4.9951	4.7775	5.0375	5.3278	5.3698	5.4493	5.1224	5.0347	5.0091	4.7456	4.8787	4.6388	4.3402	4.5466	4.4347	4.1685	4.2417	3.3408
metab_2731	Cotinine methonium ion	C11H15N2O+	5.1768	Pyridines and derivatives	4.5531	4.5092	4.5143	4.833	5.1366	4.5861	4.4057	4.5823	4.8288	4.5019	4.3042	4.3975	4.1191	4.5385	4.4056	4.0498	4.2044	4.2416
metab_2747	P-Cresol glucuronide	C13H16O7	5.2518	Organooxygen compounds	3.8373	3.9	3.9211	3.2388	2.5173	3.9025	2.947	2.4195	3.3162	2.3944	3.2923	3.6729	4.2312	4.4276	4.8678	4.0471	2.3236	2.3121
metab_2748	Protofarrerol	C17H18O6	5.2727	-	4.025	4.04	4.0238	3.5195	0.2849	3.1624	0.27	2.7208	0.2833	0.2753	0.2652	2.8638	3.131	3.1135	5.4811	0.2452	0.2434	0.2385
metab_2763	EUPATORIOCHROMENE	C13H14O3	5.3543	-	4.0969	4.0504	4.0649	4.102	3.7752	4.3415	3.9416	3.9627	3.968	3.6408	4.1817	4.3175	4.1655	4.1363	4.4179	4.0429	3.4378	3.7954
metab_2770	Glu Val Tyr	C19H27N3O7	5.3939	-	5.0994	5.1185	5.0913	4.9674	4.9096	5.239	5.4298	5.1808	5.1648	5.2632	5.2018	5.0534	4.9725	5.0506	5.2237	4.8994	5.0458	5.0156
metab_2776	Bufotenin	C12H16N2O	5.4261	Indoles and derivatives	5.1114	5.1267	5.0937	4.5309	4.6408	4.675	4.7474	4.7421	4.6972	4.9567	4.7775	4.8167	4.8361	5.0995	5.2475	5.1179	5.1042	5.131
metab_2794	Glutaminylphenylalanine	C14H19N3O4	5.5098	Carboxylic acids and derivatives	4.6168	4.5684	4.6304	4.8437	5.2017	4.8364	4.5456	4.8572	4.7391	4.7555	4.6069	4.3147	4.1859	4.402	4.4374	3.6403	4.6655	4.1878
metab_2810	Symmetric dimethylarginine	C8H18N4O2	5.6036	Carboxylic acids and derivatives	4.7405	4.7352	4.6811	5.1123	5.077	5.0725	4.7323	4.9659	5.0364	4.3944	4.5376	4.4434	4.0197	4.5009	4.3828	3.5023	3.795	3.9084
metab_2828	Fisetin	C15H10O6	5.7151	-	4.8274	4.8314	4.7919	4.5209	4.3851	4.4273	4.899	5.334	4.3518	4.4458	4.8383	4.7611	4.9471	4.6482	4.7507	4.3332	4.5374	4.6218
metab_2835	5,6,7-trihydroxy-2-(4-hydroxy-3,5-dimethoxyphenyl)-3,4-dihydro-2H-1-benzopyran-4-one	C17H16O8	5.737	-	4.8982	4.9237	4.8449	5.0107	4.7508	4.808	4.5852	4.8303	5.0041	4.9943	4.9779	5.0177	5.0335	5.0284	4.7764	4.3682	4.5112	4.3069
metab_2837	2beta,9xi-Dihydroxy-8-oxo-1(10),4,11(13)-germacratrien-12,6alpha-olide	C15H18O5	5.7574	Prenol lipids	3.9499	3.8357	3.8384	3.4629	3.4383	3.6662	2.5369	2.5735	3.0182	3.3792	2.8288	3.0589	3.9801	3.6958	4.6339	2.5317	3.56	2.466
metab_2847	Prehumulinic acid	C16H24O4	5.8065	Vinylogous acids	4.8632	4.822	4.8429	5.4524	5.1935	5.2379	5.3266	4.8547	5.1831	4.943	4.5907	4.3706	4.1131	4.8905	4.8335	3.5681	4.199	3.5569
metab_2864	3,4,5-trihydroxy-6-[(2,3,5-trihydroxy-6-methyloxan-4-yl)oxy]oxane-2-carboxylic acid	C12H20O11	5.8788	-	4.6919	4.6855	4.7346	4.1321	1.415	4.1609	3.9832	4.085	3.9096	5.1015	4.6563	4.3667	3.8578	3.5883	4.8224	1.3317	1.3277	5.0661
metab_2868	Ethyl 3-hydroxydodecanoate	C14H28O3	5.8984	Fatty Acyls	5.3613	5.3569	5.4073	5.3729	5.4178	5.4783	5.3447	5.4553	5.4318	5.4502	5.5249	5.3456	5.408	5.3332	5.3473	5.5623	5.6631	5.597
metab_2884	Rosmarinine	C18H27NO6	5.9401	-	4.3792	4.3933	4.389	4.641	4.7603	4.7252	5.0188	4.6993	4.0539	3.5433	3.5587	2.7307	4.1072	4.0668	4.5734	3.7913	3.6684	4.0401
metab_2894	8,11,14-Octadecatriynoic acid	C18H24O2	5.9612	-	5.0339	5.0182	5.029	5.3154	5.3891	5.3122	5.0202	5.0193	5.081	5.1349	5.0545	4.9887	4.9174	4.9105	4.8221	4.5569	4.7332	4.6417
metab_2902	Isoalantolactone	C15H20O2	5.9892	Prenol lipids	4.7336	4.7579	4.7622	5.1365	5.1803	5.0624	4.7352	4.7383	4.8494	4.9248	4.8098	4.6586	4.639	4.6007	4.6207	4.3382	4.4488	4.3604
metab_2903	1,4'-Bipiperidine-1'-carboxylic acid	C11H20N2O2	5.9892	-	4.3882	4.4506	4.437	4.9677	5.0043	4.8169	4.5023	4.4005	4.8529	4.865	4.1416	4.4217	3.5999	3.9049	4.3709	3.3185	3.8742	3.7678
metab_2948	1-Octen-3-yl primeveroside	C19H34O10	6.1228	Fatty Acyls	5.0194	4.972	4.9723	3.9948	4.408	3.8359	4.6739	4.2309	4.9109	4.6788	5.2019	4.5389	5.1285	4.397	4.5786	5.4035	5.6335	5.3266
metab_2949	PS(14:1(9Z)/0:0)	C20H38NO9P	6.1298	-	5.0588	5.0799	5.0708	5.1569	5.1527	5.4046	5.5569	5.0992	5.1121	5.2687	4.8908	5.0352	4.6594	4.8888	4.8572	4.4359	4.9423	4.547
metab_2972	Caryophyllene epoxide	C15H24O	6.1718	Prenol lipids	4.8095	4.7844	4.7616	4.8088	4.7879	4.9988	4.5017	5.0568	4.7284	4.7847	4.5228	4.5671	4.9917	5.1227	4.9937	4.8275	4.5734	4.4496
metab_3022	(3beta,6beta)-Furanoeremophilane-3,6-diol	C15H22O3	6.249	Prenol lipids	5.218	5.2178	5.1946	5.564	5.6174	5.5859	5.1153	5.1055	5.3237	5.3348	5.3265	5.2318	5.1151	5.0431	5.0041	4.6927	4.8941	4.7611
metab_3024	28-Glucosyl-3b-hydroxy-12-oleanene-30-methoxy-28-oic acid 3-[arabinosyl-(1->3)-glucuronide]	C48H74O20	6.249	Prenol lipids	6.2282	6.1378	6.155	6.1162	6.0485	6.0462	6.1006	6.122	5.7433	6.0083	6.0571	6.0467	6.1602	6.1123	6.0953	6.2523	6.2126	6.1791
metab_3026	2,3-Diketo-13,14-dihydro-PGF1a	C20H30O6	6.256	-	6.6431	6.6357	6.6142	6.8172	6.8496	6.8458	6.5775	6.5676	6.8002	6.8148	6.6133	6.6856	6.6774	6.6119	6.4836	6.1217	6.338	6.2305
metab_3027	8-[1-(2,4-dihydroxyphenyl)-2-hydroxy-3-(4-hydroxy-3-methoxyphenyl)propyl]-2-(3-hydroxyphenyl)-3,4-dihydro-2H-1-benzopyran-3,5,7-triol	C31H30O10	6.256	-	5.3337	5.2473	5.2767	5.3816	4.8348	4.9852	4.589	4.6723	5.2189	5.4505	5.4542	5.1441	5.3537	5.867	5.586	4.7253	5.0444	4.3696
metab_3038	Cinncassiol D4 2-glucoside	C26H42O10	6.2839	Prenol lipids	5.3787	5.3548	5.3716	4.8245	4.9865	4.7753	5.0077	4.6091	5.5332	5.2972	5.5712	5.2458	5.4278	5.2884	5.2568	5.7476	5.6213	5.8184
metab_3046	KOBUSONE	C14H22O2	6.2979	Organooxygen compounds	5.1152	5.0835	5.0893	5.5449	5.4498	5.4559	4.9987	5.1412	5.1503	5.3343	5.1252	5.0695	4.9932	5.0615	4.8485	4.5425	4.6998	4.7138
metab_3051	Austdiol	C12H12O5	6.3048	Azaphilones	4.4711	4.5716	4.4519	3.536	3.5086	3.5309	3.4771	3.5138	4.6972	3.7642	4.4288	4.5642	4.374	4.7336	4.9882	4.2692	4.291	4.1314
metab_3056	Prostaglandin PGE2 1-glyceryl ester	C23H38O7	6.3118	Fatty Acyls	6.5553	6.5097	6.5039	6.6877	6.6284	6.5983	6.4883	6.4796	6.8084	6.3805	6.369	6.5012	6.5227	6.4628	6.3748	6.0522	6.0817	6.2925
metab_3060	PGG2	C20H32O6	6.3188	Fatty Acyls	6.4262	6.3828	6.3875	6.3238	6.3415	6.4752	6.4624	6.3814	6.3245	6.4225	6.2781	6.358	6.5731	6.544	6.4804	5.8385	6.0471	6.1283
metab_3065	7-Acetoxy-6-hydroxylimonin	C28H34O10	6.3328	Steroids and steroid derivatives	4.8123	4.5528	4.733	3.6617	3.6343	3.6566	3.6028	3.6395	3.631	3.6143	3.5924	3.5965	4.6871	4.7974	5.9237	3.5473	3.5432	3.5316
metab_3076	Jasmonic acid	C12H18O3	6.3468	Fatty Acyls	4.9124	4.921	4.9275	5.185	5.3947	5.2388	5.0178	5.0734	5.0191	5.1946	4.4825	4.759	4.5091	4.8135	4.7234	4.3493	4.7227	4.8506
metab_3084	Comptonin	C17H16O4	6.3538	-	5.1669	5.1675	5.1643	3.3107	4.4991	4.2335	5.3628	5.1854	5.264	6.0749	4.0174	4.2514	4.9263	5.4667	6.0425	4.8967	4.3856	3.1806
metab_3093	PS(20:1(11Z)/0:0)	C26H50NO9P	6.3608	-	6.2783	6.2322	6.2281	6.3424	6.348	6.6049	6.3361	6.2485	6.2265	6.0474	6.2767	6.0785	6.038	6.1919	6.1968	5.8037	5.9194	5.9488
metab_3094	8-oxo-9,11-octadecadiynoic acid	C18H26O3	6.3678	-	6.137	6.1282	6.1197	6.5402	6.592	6.6098	6.0806	6.1888	6.2421	6.1924	6.1191	6.0007	5.8792	6.0388	5.9683	5.3354	5.549	5.419
metab_3152	3'-Methoxy-[6]-Gingerdiol 3,5-diacetate	C22H34O6	6.451	-	4.8746	4.8673	4.9111	4.9139	5.5492	5.0793	4.4958	5.3613	4.0333	3.9236	4.7202	3.9274	3.9081	4.4663	4.1186	3.7843	3.8999	3.9794
metab_3179	Lucidenic acid F	C27H36O6	6.4788	Prenol lipids	5.8489	5.8714	5.8945	5.8197	5.771	5.6727	5.9408	5.8565	6.0354	5.7737	5.9269	5.9004	5.8835	5.8865	5.7349	5.9425	5.7623	5.9447
metab_3220	10-HODTA methyl ester	C19H30O3	6.5485	-	5.239	5.2046	5.2121	5.5147	5.4121	5.4093	5.2521	5.1082	5.2466	5.3324	5.2835	5.1111	5.0773	4.9437	4.9636	4.9437	4.9226	4.9874
metab_3225	2-Methoxyhomopterocarpin	C18H18O5	6.5555	Isoflavonoids	4.6691	4.5712	4.5331	0.0892	0.0843	4.746	3.8755	4.0325	0.0837	0.0808	0.0772	3.9028	4.9257	5.5409	5.6709	0.0701	0.0695	0.0678
metab_3272	Zedoarol	C15H18O3	6.6044	Prenol lipids	4.7069	4.4842	4.5027	3.706	3.6785	3.7008	3.8679	3.6837	3.6752	3.6585	3.6366	3.729	5.5099	5.5655	5.8196	3.8921	3.5874	3.5759
metab_3276	MG(0:0/18:3(6Z,9Z,12Z)/0:0)	C21H36O4	6.6114	Fatty Acyls	5.8206	5.8241	5.7733	5.9657	6.1376	6.1243	5.8692	5.9801	5.9769	5.7994	5.6084	5.7607	5.7617	5.8143	5.7816	5.4777	5.2922	5.6177
metab_3307	12-Ketodeoxycholic acid	C24H38O4	6.6602	Steroids and steroid derivatives	5.0679	5.0836	5.0093	5.2162	5.1768	5.4014	4.888	5.003	5.0851	5.2614	4.7615	5.0863	4.764	4.9026	4.8582	4.5774	4.9462	4.7436
metab_3351	Tridecyl phloretate	C22H36O3	6.737	Fatty Acyls	4.9518	4.9891	4.7718	5.2255	5.2419	5.2348	4.9276	4.7467	4.8683	5.1763	4.8128	4.8567	4.3413	4.7257	4.9191	3.8081	4.9482	4.7557
metab_3357	(E)-2,6-Dimethyl-2,5-heptadienoic acid	C9H14O2	6.7508	Fatty Acyls	5.1026	5.1048	5.0206	5.0184	4.92	5.0839	5.4532	5.3575	5.5045	4.9886	5.0469	5.0862	5.0168	5.3827	4.4772	4.7888	4.9257	4.8915
metab_3358	Methyl 12,13-epoxy-9,15-octadecadienoate	C19H32O3	6.7508	-	5.2227	5.1712	5.0804	5.5569	5.3772	5.4248	5.0453	5.1012	5.3255	5.3178	5.159	5.0975	4.984	5.0005	4.9696	4.9296	4.4828	4.8265
metab_3362	PC(16:1(9Z)/0:0)	C24H48NO7P	6.7578	Glycerophospholipids	6.1942	6.2016	6.1658	6.1307	6.1247	6.2472	6.3711	6.2299	6.1827	6.1423	6.1981	6.0526	6.0965	6.1216	6.1732	6.0703	6.0329	6.0227
metab_3529	21-hydroxyallopregnanolone	C21H34O3	7.0649	-	5.5551	5.5701	5.5566	5.8124	5.741	5.7803	5.6671	5.6482	5.6175	5.6215	5.5723	5.614	5.5282	5.6358	5.5954	5.4065	5.3303	5.3563
metab_3530	4-Deoxy-6-hydroxysquamotacin	C37H66O7	7.0649	Fatty Acyls	5.5432	5.5336	5.687	6.062	6.0715	6.0265	5.6309	5.5945	5.7159	5.9966	5.7704	5.6419	5.8319	5.5759	5.6511	5.3777	5.3831	5.309
metab_3650	Cer(d14:1(4E)/20:0(2OH))	C34H67NO4	7.4905	-	5.5464	5.4715	5.5883	5.6731	5.5319	5.6377	5.6432	5.7208	5.6325	5.4989	5.5011	5.4212	5.6127	5.59	5.6008	5.6777	5.5184	5.5777
metab_4117	GPCho(14:0/20:3)	C42H78NO8P	8.8097	Glycerophospholipids	4.6043	4.3381	4.5611	3.768	3.7405	3.7628	3.709	3.7457	3.7372	3.7205	3.6986	3.7027	3.7006	3.7062	4.534	6.1141	6.1773	5.0209
metab_4218	PA(15:0/20:3(8Z,11Z,14Z))	C38H69O8P	8.7119	Glycerophospholipids	7.0191	6.9648	7.0332	7.0617	6.9557	7.0263	7.1892	7.0031	7.0758	7.1861	7.1096	7.1695	7.0293	7.029	6.9908	6.8688	6.8142	6.6687
metab_4227	DG(16:0/18:3(9Z,12Z,15Z)/0:0)	C37H66O5	8.6072	Fatty Acyls	7.3613	7.2889	7.3558	7.2758	7.1874	7.266	7.391	7.2562	7.2986	7.4214	7.4033	7.4596	7.3463	7.3884	7.3733	7.3341	7.3045	7.1827
metab_4231	PE(18:3(9Z,12Z,15Z)/P-16:0)	C39H72NO7P	8.5932	Glycerophospholipids	6.7197	6.8149	6.859	6.695	6.6022	6.8145	7.1265	6.7685	6.8553	7.1192	7.0901	7.205	6.9423	6.9222	6.9477	6.6866	6.5975	6.541
metab_4239	PE(20:4(8Z,11Z,14Z,17Z)/P-16:0)	C41H74NO7P	8.3977	Glycerophospholipids	7.0942	7.2721	7.2875	6.9578	6.9468	7.1775	7.4595	7.2056	7.2359	7.4516	7.4422	7.5981	7.417	7.3507	7.4213	7.1735	7.1282	7.2005
metab_4264	DG(18:2(9Z,12Z)/18:3(9Z,12Z,15Z)/0:0)	C39H66O5	8.1114	Fatty Acyls	7.3189	7.2854	7.3513	7.1876	7.1732	7.3277	7.4473	7.2926	7.3164	7.3967	7.3728	7.5024	7.3813	7.4345	7.3727	7.1609	7.1569	7.109
metab_4313	DG(18:3(9Z,12Z,15Z)/16:0/0:0)	C37H66O5	7.6718	Fatty Acyls	5.7425	5.9588	5.8873	6.1733	6.1873	5.9807	6.2377	6.0552	6.1634	6.1212	5.9915	6.048	5.8192	5.8692	5.9112	6.054	6.0778	5.8623
metab_4323	DG(18:1(11Z)/18:3(9Z,12Z,15Z)/0:0)	C39H68O5	7.6369	Fatty Acyls	5.9371	6.1679	6.092	6.2763	6.1436	6.0229	6.3827	6.1978	6.3676	6.1494	6.0988	6.1777	6.0083	6.0057	6.0383	6.179	6.1642	6.096
metab_4444	DG(20:4(8Z,11Z,14Z,17Z)/16:1(9Z)/0:0)	C39H66O5	7.2881	Glycerolipids	5.4363	5.4041	5.4391	5.0745	5.191	4.8785	5.0706	4.8045	5.1564	5.2927	5.3659	5.2391	5.286	5.3494	5.437	5.9096	5.8742	5.5877
metab_4545	(+/-)8(9)-EET methyl ester	C21H34O3	7.1416	-	5.4252	5.4162	5.4258	5.5826	5.5494	5.6899	5.6056	5.6249	5.5838	5.4045	5.4876	5.4928	5.4484	5.4781	5.5411	5.4967	5.3332	5.3262
metab_4617	Pregnanetriol	C21H36O3	7.0299	Steroids and steroid derivatives	6.3819	6.4046	6.3982	6.4549	6.4466	6.5986	6.559	6.6105	6.4869	6.4039	6.3259	6.4704	6.4248	6.4561	6.4518	6.1743	6.1422	6.2728
metab_4709	Annonsilin A	C37H66O7	6.9252	Fatty Acyls	5.8443	5.8523	5.7941	6.2617	6.1789	6.157	5.5772	5.8253	5.9486	5.9765	5.5639	5.5823	5.5684	5.646	5.5673	5.2969	5.2971	4.9867
metab_4798	PC(14:0/0:0)	C22H46NO7P	6.8206	Glycerophospholipids	5.3092	5.3057	5.3126	5.0757	4.9847	5.0972	4.9736	5.0371	4.9516	4.9566	5.7222	5.2837	5.318	5.417	5.1129	5.2523	5.1531	5.2971
metab_4803	1-Palmitoyl Lysophosphatidic Acid	C19H39O7P	6.8136	-	5.8131	5.8214	5.7458	5.9482	5.8544	5.9409	5.9333	5.9049	5.9738	5.751	5.6863	5.6959	5.619	5.6858	5.6715	5.6796	5.6068	5.5885
metab_4895	Alpha-Campholene acetate	C12H20O2	6.723	Prenol lipids	4.766	4.7133	4.6388	4.7747	4.5179	4.78	4.8462	4.8445	4.9827	4.5398	4.823	4.9652	4.4472	4.9384	4.3971	4.0576	4.5535	4.1417
metab_4931	DG(22:4n6/0:0/18:4n3)	C43H68O5	6.6882	Glycerolipids	5.8579	5.8015	5.6385	6.1895	5.8901	6.1075	5.4719	5.7519	5.9123	5.9554	5.5329	5.469	5.5757	5.386	5.5874	5.2208	5.0043	5.5549
metab_4980	Muzanzagenin	C27H38O5	6.6533	Steroids and steroid derivatives	5.4885	5.4175	5.3612	5.2226	5.2938	5.3916	5.4502	5.3548	5.4328	5.2031	5.3238	5.2707	5.3431	5.4481	5.4479	5.3193	5.387	5.0466
metab_5021	Hebevinoside VI	C41H68O12	6.6044	Flavonoids	5.7482	5.7466	5.7046	6.2953	6.1002	6.1116	5.5446	5.7176	5.9529	6.0492	5.5852	5.5369	5.4208	5.4657	5.6018	5.2949	5.1975	5.2733
metab_5046	Tetrahydrocortisone	C21H32O5	6.5903	Steroids and steroid derivatives	5.1507	5.1007	4.9879	5.4278	5.1794	5.2626	5.1036	5.1423	5.1575	5.0702	4.9114	4.723	4.8924	4.6696	4.784	4.4678	3.6836	4.3041
metab_5060	Cortol	C21H36O5	6.5763	Steroids and steroid derivatives	5.4069	5.4569	5.4207	5.5956	5.54	5.5934	5.3729	5.4847	5.5353	5.4735	5.3286	5.3987	5.299	5.3677	5.3699	5.2428	5.29	5.3603
metab_5134	Melleolide C	C24H32O8	6.5206	Prenol lipids	4.7938	4.8845	4.8839	3.9496	3.9221	5.6684	4.859	4.2093	3.9188	3.9021	3.8802	4.7288	4.4633	5.0324	5.1481	3.8352	3.831	3.8194
metab_5150	4,4'-Diaponeurosporene	C30H42	6.5137	-	5.2463	5.3048	5.2529	5.1141	5.8282	5.5781	4.0657	5.5689	4.3484	5.0052	5.1444	4.3445	4.7372	4.8784	4.9908	4.2733	4.9602	4.5663
metab_5170	Sclerosporin	C15H22O2	6.4997	-	4.5417	4.5909	4.6745	5.1425	4.9734	5.0489	4.588	4.7077	4.7929	4.6408	4.4459	4.4122	4.3851	4.5033	4.3451	3.7141	3.9377	3.8857
metab_5179	6-hydroxysphingosine	C18H37NO3	6.4858	-	6.1623	6.196	6.1697	6.4093	6.2741	6.3808	6.3115	6.3728	6.193	6.0989	6.2087	6.2	6.0883	6.0891	6.2091	5.8997	6.0046	5.9884
metab_5186	LysoPE(18:3(6Z,9Z,12Z)/0:0)	C23H42NO7P	6.4788	Glycerophospholipids	6.0456	6.0238	6.0218	6.2399	6.131	6.2291	5.9767	5.8851	5.9299	5.9115	6.1655	6.019	5.993	5.9217	5.981	6.0954	6.0482	5.9908
metab_5199	Rubraflavone B	C30H34O5	6.472	Flavonoids	5.6488	5.674	5.6314	5.8502	5.839	5.8592	5.6362	5.578	5.599	5.5515	5.6448	5.5216	5.5471	5.6313	5.6905	5.5966	5.4182	5.5099
metab_5226	Ile His Lys His	C24H39N9O5	6.458	-	6.338	6.3005	6.32	6.4199	6.3924	6.5567	6.2892	6.3071	6.2421	6.2373	6.3001	6.148	6.2591	6.2129	6.3404	6.1767	6.1334	6.0337
metab_5231	(8)-Gingerol	C19H30O4	6.458	Phenols	4.9079	4.859	4.8819	5.3896	5.3228	5.3317	4.7307	4.8169	4.8796	5.076	4.6816	4.5985	4.4044	4.6103	4.5919	3.814	3.6666	3.8326
metab_5286	LysoPE(18:4(6Z,9Z,12Z,15Z)/0:0)	C23H40NO7P	6.4231	Glycerophospholipids	5.4691	5.4455	5.4883	5.5851	5.5474	5.652	5.6272	5.3899	5.3386	5.3868	5.4729	5.3748	5.5536	5.4205	5.3848	5.6694	5.4916	5.2472
metab_5317	4-(Methylnitrosamino)-1-(3-pyridyl)-1-butanone	C10H13N3O2	6.4025	Organooxygen compounds	7.3159	7.3725	7.3262	7.2549	7.1456	7.1746	7.4598	7.2631	7.3452	7.3006	7.4102	7.4538	7.4042	7.3335	7.3005	7.5969	7.4156	7.5758
metab_5331	Macrophyllic acid A	C15H22O2	6.3886	-	5.4704	5.4766	5.4883	5.7878	5.7963	5.7817	5.4094	5.4099	5.4877	5.6284	5.5358	5.3927	5.3513	5.4633	5.3701	5.0023	5.1358	5.0825
metab_5351	3,4-Dimethylstyrene	C10H12	6.3816	-	4.9999	5.0221	5.0229	5.1216	5.173	5.151	4.9789	5.0991	4.9551	5.0502	5.0615	4.9219	4.9177	5.0024	4.9606	4.781	4.8489	4.8482
metab_5357	9S-hydroxy-12R,13S-epoxy-10E,15Z-octadecadienoic acid	C18H30O4	6.3748	-	6.5509	6.5225	6.5348	6.8151	6.8744	6.8342	6.4567	6.4836	6.6078	6.6104	6.6015	6.5135	6.3868	6.5041	6.3809	5.9238	6.0581	5.9381
metab_5361	2,4,7-decatrienal	C10H14O	6.3748	-	4.8467	4.8665	4.9004	5.0637	4.9927	5.06	4.8649	4.8495	4.866	4.9059	4.9304	4.7942	4.6425	4.8057	4.7234	4.4782	4.6927	4.6153
metab_5362	Ectocarpen	C11H16	6.3748	-	5.7454	5.7548	5.7417	5.9089	5.9197	5.9334	5.7247	5.7827	5.7356	5.801	5.8083	5.7152	5.6523	5.742	5.6884	5.4865	5.5839	5.5454
metab_5373	(3b,6b,8a,12a)-8,12-Epoxy-7(11)-eremophilene-6,8,12-trimethoxy-3-ol	C18H30O5	6.3608	Naphthofurans	5.4531	5.392	5.3711	5.8475	5.9029	6.0466	5.4478	5.6648	5.523	5.4238	5.2262	5.2303	5.0995	5.3751	5.1925	3.745	4.44	4.4931
metab_5399	Artonin P	C25H20O8	6.3468	-	4.7412	4.6663	4.7706	4.7414	3.8022	3.8245	3.7707	3.8074	4.8534	4.7064	4.5966	4.4525	5.3929	5.4655	5.8508	4.9026	4.6834	4.4788
metab_5423	Crocin 3	C32H44O14	6.3328	Prenol lipids	5.1789	5.1615	5.127	4.2509	4.2235	4.6371	4.192	5.5794	4.2202	4.2034	4.5535	5.3191	5.2407	5.3831	6.1701	4.7137	4.3756	4.3113
metab_5432	RETUSIN 7-METHYL ETHER	C17H14O5	6.3328	-	6.0754	6.0518	6.048	5.8398	5.192	5.8023	5.5878	6.2235	5.9146	6.4491	5.9838	5.8912	6.2841	6.4335	6.6323	5.3615	5.6619	5.3494
metab_5440	2'',6''-Di-O-acetylononin	C26H26O11	6.3258	-	5.8573	5.8381	5.8127	5.3127	4.2862	4.9986	5.3375	5.2508	5.8178	5.5459	5.7739	5.8349	6.5156	6.2906	6.5917	5.9614	5.4634	5.2103
metab_5447	Yucalexin B14	C20H30O2	6.3258	Prenol lipids	5.027	5.038	5.0512	5.2979	5.3288	5.2581	5.0585	4.9354	5.009	5.0848	5.1042	5.0026	4.9223	5.1252	4.7938	4.6509	4.6103	4.5069
metab_5457	Hexyl heptanoate	C35H34N4O8	6.3188	Fatty Acyls	6.3444	6.2787	6.3011	6.2413	5.8118	6.0384	6.1308	6.1073	6.0752	6.3073	6.2313	6.217	6.5207	6.7728	6.7933	5.7333	5.9266	5.8009
metab_5466	Valyl-Histidine	C11H18N4O3	6.3118	Carboxylic acids and derivatives	6.0109	5.9706	5.9839	6.1632	6.1498	6.3035	6.1581	5.9679	6.0481	5.8698	6.0381	5.7751	5.8391	5.9158	5.8036	5.6963	5.7345	5.5867
metab_5471	Glycerol tribenzoate	C24H20O6	6.3118	Benzene and substituted derivatives	5.2921	5.2241	5.2836	5.1466	4.7647	4.8115	5.0638	5.0515	4.9602	5.3313	5.2592	5.1852	5.4622	5.7478	5.79	4.6333	4.8837	4.7298
metab_5472	Gibberellin A123	C20H28O6	6.3118	Prenol lipids	6.015	5.9938	5.9853	6.234	6.3315	6.2272	6.0953	6.2084	6.2583	6.145	5.7987	5.9435	5.8903	5.9822	5.8399	5.149	5.457	5.3717
metab_5475	HEMATEIN	C16H12O6	6.3118	Indanes	5.4049	5.4101	5.3668	5.0121	4.5928	4.6444	5.4179	5.2055	4.6907	5.1986	5.36	5.118	5.7433	6.0452	6.0669	4.727	4.8655	4.9916
metab_5476	Dihydrodaidzein	C15H12O4	6.3118	Isoflavonoids	4.8708	4.8483	4.8294	5.0425	3.9143	4.4181	4.2057	4.2035	4.4135	4.1777	4.4338	4.5175	5.3216	5.4788	5.6326	4.1625	3.9675	3.3961
metab_5491	Methyl trans-p-methoxycinnamate	C11H12O3	6.2979	Cinnamic acids and derivatives	4.5507	4.5883	4.5567	3.9193	3.4158	5.0652	4.2423	4.2089	4.343	4.2458	4.1873	4.0896	4.4447	4.7583	5.0642	3.7929	3.9345	3.6875
metab_5497	3,4,5-trihydroxy-6-{[5-methoxy-2,2-dimethyl-6-(3-oxo-3-phenylprop-1-en-1-yl)-2H-chromen-7-yl]oxy}oxane-2-carboxylic acid	C27H28O10	6.2909	-	4.5989	4.662	4.6328	4.0404	3.6019	4.5291	3.5704	3.6071	3.8049	5.2705	4.55	3.5641	4.8044	4.954	5.6666	3.9654	4.6565	3.4992
metab_5500	3,4,5-trihydroxy-6-(2,4,6-trihydroxyphenoxy)oxane-2-carboxylic acid	C12H14O10	6.2909	-	4.225	4.2814	4.3602	3.8756	3.3027	3.5082	3.2712	3.3079	3.2994	3.4112	3.2608	3.6218	3.2628	4.6296	5.8221	4.4574	4.7244	4.4102
metab_5511	2,3-Methyleneglutaric acid	C7H8O4	6.2839	Fatty Acyls	3.9108	3.9794	3.9003	2.8738	3.158	2.7025	3.261	2.9171	3.7328	4.3841	2.637	2.9219	3.763	3.9605	5.2327	3.5303	2.4668	2.5765
metab_5519	7-Methoxyflavanone	C16H14O3	6.2769	-	4.949	5.0247	5.0431	4.6768	4.1931	5.2268	4.6838	4.8745	5.078	5.4411	5.0856	5.012	5.3389	5.5183	5.937	5.2071	5.2169	4.9091
metab_5526	3,4,5-trihydroxy-6-[(3-methoxy-3-oxopropanoyl)oxy]oxane-2-carboxylic acid	C10H14O10	6.2699	-	4.0622	4.0947	4.2735	3.3079	3.2805	3.3028	3.249	3.2857	3.2772	3.2605	3.2386	3.2427	3.2406	4.3256	5.1926	4.113	4.3859	3.9477
metab_5536	Xi-5-Hydroxydodecanoic acid	C12H24O3	6.263	Fatty Acyls	4.6667	4.6575	4.6098	4.7939	4.9633	5.0293	4.6253	4.8845	4.5568	4.8607	4.4816	4.5866	4.8814	4.5367	4.5904	4.3677	4.57	4.4427
metab_5541	2,3-dinor-PGE1	C18H30O5	6.256	-	6.2412	6.2228	6.219	6.4522	6.5481	6.5392	6.195	6.245	6.3474	6.384	6.2391	6.2149	6.1845	6.1926	6.1015	5.9047	5.9925	5.9858
metab_5551	6,9,12-Octadecatriynoic acid	C18H24O2	6.242	-	5.5823	5.6131	5.5858	6.0017	6.0098	6.0038	5.5024	5.6201	5.7326	5.7414	5.6188	5.4988	5.3962	5.5486	5.4368	5.0044	5.1286	5.1476
metab_5575	4-Phenyl-3-buten-2-ol	C10H12O	6.242	Cinnamyl alcohols	5.1786	5.204	5.1703	5.3247	5.3798	5.3548	5.1769	5.2679	5.1249	5.1924	5.2479	5.1276	5.1378	5.1743	5.1513	5.0143	5.0284	5.064
metab_5589	Dukunolide B	C26H26O10	6.228	Fatty Acyls	5.0206	4.9951	4.959	4.2435	3.5531	4.4939	4.2033	3.6125	5.0528	4.6105	4.8332	4.8947	5.5649	5.6721	5.9199	5.3653	4.8002	4.1336
metab_5611	Ceanothine E	C34H40N4O4	6.214	Carboxylic acids and derivatives	5.4941	5.4999	5.4157	5.7968	6.0166	5.9555	5.9834	5.839	5.9795	5.3843	5.337	5.2326	4.5508	5.0555	5.1662	3.6853	4.7438	3.6696
metab_5614	6beta-Hydroxyestradiol-17beta	C18H24O3	6.214	-	5.2315	5.2675	5.2178	5.7049	5.8048	5.6654	5.2729	5.3672	5.4932	5.4141	5.1574	5.1122	4.9419	5.1592	5.0411	4.4388	4.781	4.7322
metab_5617	Ile Trp His Leu	C29H41N7O5	6.207	-	6.051	6.0312	6.0247	6.2437	6.2858	6.4057	6.3422	6.1191	6.2495	5.8927	6.0482	5.9504	5.6573	5.8982	5.9842	5.4116	5.7209	5.4513
metab_5623	7,4'-Dihydroxy-3',5'-dimethoxyisoflavanone	C17H16O6	6.207	-	5.6559	5.6232	5.6017	5.6457	5.3752	5.2896	5.5013	5.4247	5.5694	5.9463	5.6451	5.5103	5.6667	5.8038	5.9235	4.9397	5.4169	5.4952
metab_5641	4',5'-Dihydroxy-3,7,3'-trimethoxyflavone	C18H16O7	6.193	-	4.4424	4.4942	4.4596	4.52	3.3598	5.2629	3.3283	3.365	3.3565	5.2436	4.8124	4.0803	3.3199	3.3255	5.626	3.2729	3.2688	3.5758
metab_5648	Pro Gly Arg His	C19H31N9O5	6.186	-	5.4001	5.3819	5.3756	5.4636	5.0843	5.59	5.3204	5.3084	5.2507	4.9647	5.4187	5.0558	5.4303	5.5293	5.541	5.3617	5.3211	4.9919
metab_5721	3,4,5-trihydroxy-6-[5-hydroxy-3-methoxy-4-(3-methylbut-2-en-1-yl)-2-[2-oxo-2-(2,4,5-trihydroxyphenyl)ethyl]phenoxy]oxane-2-carboxylic acid	C26H30O13	6.1298	-	6.1662	6.1461	6.1607	5.9156	5.6241	5.9239	6.145	5.9835	6.2068	6.0761	5.7531	6.0224	6.3523	6.4389	6.3118	5.8358	5.8843	6.3102
metab_5722	6-{2-[6-carboxy-5-(2,4-dihydroxyphenyl)-3-methylcyclohex-2-en-1-yl]-3-hydroxyphenoxy}-3,4,5-trihydroxyoxane-2-carboxylic acid	C26H28O12	6.1298	-	5.2082	5.2158	5.1827	4.9555	4.6655	4.966	5.1445	5.0183	5.0697	5.0623	4.8295	5.012	5.4206	5.5145	5.4298	4.7883	4.7073	5.2491
metab_5723	5'-Hydroxy-3',4',7,8-tetramethoxyflavan	C19H22O6	6.1298	-	5.48	5.4858	5.4551	5.2738	5.0226	5.3565	5.4725	5.2814	5.3979	5.3802	5.1817	5.3472	5.6536	5.8303	5.655	5.0835	5.0676	5.5533
metab_5727	ML-236C	C18H26O3	6.1298	-	6.3954	6.3845	6.3764	6.7539	6.7813	6.7604	6.2961	6.3724	6.5366	6.5364	6.4515	6.3547	6.2601	6.3036	6.2091	5.8733	6.0364	5.9996
metab_5737	Chrysophanol	C15H10O4	6.1228	Anthracenes	4.1475	4.1595	4.1986	4.4805	3.395	3.8946	3.4706	3.4873	3.6296	4.0608	4.1914	3.9397	4.3325	5.045	4.7999	3.7623	3.5978	3.102
metab_5758	Gynocardin	C12H17NO8	6.1018	Organooxygen compounds	6.6069	6.6277	6.6157	6.7172	6.6392	6.5673	6.4925	6.4763	6.5312	6.7584	6.7597	6.6762	6.6075	6.6918	6.7053	6.5331	6.3793	6.3771
metab_5760	N-Acetyl-L-glutamate 5-semialdehyde	C7H11NO4	6.1018	Carboxylic acids and derivatives	5.6768	5.7488	5.7161	5.7527	5.7387	5.7621	5.635	5.5244	5.5824	5.8939	5.8999	5.7667	5.6993	5.859	5.8436	5.5639	5.5442	5.5471
metab_5802	Galacturonic acid	C6H10O7	6.0598	Organooxygen compounds	3.6759	3.8034	3.7462	3.0184	2.8973	2.9196	3.8083	3.346	2.894	2.9288	2.8554	3.4453	4.0812	4.1407	3.8005	2.8104	2.8063	2.7948
metab_5806	Trigoforin	C12H12O2	6.0528	Coumarins and derivatives	3.9963	4.071	4.0823	3.2235	2.7655	0.3145	4.1432	3.8292	3.0289	2.9411	3.7026	3.9855	4.3134	4.5205	4.1361	0.2616	2.8342	2.6931
metab_5807	Aminofurantoin	C8H8N4O3	6.0528	Azolidines	4.4569	4.5154	4.4732	4.3702	4.1946	3.8552	4.5851	4.347	4.1572	4.1627	4.2236	4.42	4.7556	4.8247	4.6107	3.7908	4.1574	3.9642
metab_5808	13,14-Dihydro PGE1	C20H36O5	6.0458	Fatty Acyls	4.592	4.6229	4.4985	4.6536	4.5485	4.8278	4.4398	4.5367	4.3535	4.1961	4.6142	4.4686	4.9681	4.6924	4.569	4.2147	4.251	4.4857
metab_5822	3,4',5-Trismethoxybenzophenone	C16H16O4	6.0248	-	4.6098	4.6468	4.6178	4.7226	4.2806	4.662	4.4191	4.0391	4.6286	4.4426	4.5483	4.6067	4.5815	4.6585	4.7923	4.3152	4.2552	4.4907
metab_5834	PSF-A	C23H28O10	6.0102	Prenol lipids	5.8074	5.794	5.782	5.5167	5.3866	5.5533	5.5478	5.5049	5.4728	5.7238	5.5939	5.6161	6.0852	6.237	5.9604	5.5068	5.3619	5.9101
metab_5839	3,4-Dimethoxyphenyl methyl ketone	C10H12O3	6.0032	Organooxygen compounds	4.0017	3.9974	4.0072	3.3187	3.1756	3.6209	3.8082	3.6641	3.641	3.7858	3.3291	3.7577	4.37	4.5196	4.1268	3.6323	3.7176	4.0202
metab_5860	N-depropylpropafenone	C18H21NO3	5.9612	Linear 1,3-diarylpropanoids	4.1656	4.2102	4.179	4.725	3.9441	4.7061	3.6638	4.0182	3.8022	3.1698	4.2318	4.1609	4.3257	4.2169	3.6946	4.1382	4.2766	4.0828
metab_5861	Ecklonialactone A	C18H26O3	5.9612	-	5.653	5.6356	5.6478	5.9685	6.0136	5.9257	5.5997	5.5982	5.7063	5.784	5.7219	5.6122	5.5317	5.4954	5.4696	5.2428	5.3845	5.3168
metab_5862	S-4-Hydroxymephenytoin	C12H14N2O3	5.9612	Azolidines	4.542	4.5339	4.5072	4.7471	5.2003	4.7055	4.4365	4.512	4.6307	5.1387	4.4213	4.5548	3.8503	4.2789	4.4761	4.1863	4.8054	4.3839
metab_5872	Bolusanthin	C16H14O7	5.9471	-	5.0023	5.022	4.9934	4.8822	4.6639	4.6828	5.1114	5.0863	4.7758	5.1564	4.9556	5.0454	5.3212	5.0191	5.0157	4.4649	4.5302	4.8484
metab_5878	12-hydroxy-3Z,6Z-dodecadienoic acid	C12H20O3	5.9401	-	6.2739	6.2814	6.2732	6.5374	6.6003	6.5546	6.3691	6.2917	6.3377	6.394	6.3291	6.2965	5.8473	6.2681	6.2051	5.7765	6.1046	5.8824
metab_5894	Helipyrone	C17H20O6	5.8984	Pyrans	5.4604	5.4431	5.505	4.2064	4.062	3.8695	4.3353	4.1541	5.4565	5.5682	5.2245	4.9286	5.6959	6.1721	4.7417	5.8871	6.4389	4.4521
metab_5898	(R)-Rutaretin 1'-(6''-sinapoylglucoside)	C31H34O14	5.8844	-	4.7352	4.6833	4.7256	5.3369	3.4705	4.97	4.0606	4.3346	4.1133	3.4505	4.5199	4.3884	5.039	5.463	5.5534	5.3854	3.3794	3.3678
metab_5899	5,6-epoxy,18R-HEPE	C20H28O4	5.8844	Fatty Acyls	5.352	5.3284	5.3201	5.7623	5.7977	5.7458	5.1886	5.3644	5.5482	5.4128	5.1259	5.1541	5.2094	5.1243	5.0793	4.7543	4.7697	4.7605
metab_5907	5,7-Dihydroxy-4'-methoxy-8-methylflavanone	C17H16O5	5.8686	-	4.6719	4.6778	4.6818	4.697	4.5669	5.2362	3.9557	4.0542	4.2901	4.7028	5.3912	4.3364	4.3241	4.5895	4.733	4.1568	4.3537	3.9367
metab_5917	3-Hydroxysuberic acid	C8H14O5	5.8415	Hydroxy acids and derivatives	3.8877	3.7502	3.8547	4.8858	4.3457	4.228	4.3135	3.9665	4.0923	3.1488	3.1652	3.5168	3.7653	3.2949	3.3536	3.2073	3.0859	2.6676
metab_5918	Lecanoric acid	C16H14O7	5.8415	-	4.8787	4.8445	4.8721	4.9001	4.8057	4.7954	4.9452	5.1391	4.8093	4.9039	4.8471	4.7308	5.0311	4.7383	4.9267	4.1106	4.4009	4.6975
metab_5931	(-)-Sparticarpin	C17H16O5	5.8065	-	6.2851	6.2705	6.282	6.2435	5.8433	6.2738	5.8483	5.6223	6.1378	6.293	6.2464	6.3647	6.2539	6.208	6.4692	6.154	6.0246	6.3812
metab_5933	Thr Ala Arg Arg	C19H38N10O6	5.7995	-	5.0282	4.9851	4.9887	5.384	5.4589	5.3653	4.9662	4.8409	4.9044	4.502	5.0867	4.7342	4.4641	4.7151	4.7921	4.0818	4.3574	4.0661
metab_5939	5-(3',4'-Dihydroxyphenyl)-gamma-valerolactone	C11H12O4	5.7854	-	3.9707	3.9019	3.8035	3.5398	3.3934	3.666	3.6288	3.5001	3.4866	3.2368	3.9912	3.8248	3.9719	4.5209	4.6666	3.2796	2.5953	2.9176
metab_5953	7-Hydroxy-5,6-dimethoxyflavone 7-glucoside	C23H24O10	5.7304	-	4.8589	4.9246	4.8176	4.578	4.3868	4.1546	4.3463	4.9455	4.1757	4.8872	4.7898	4.5522	4.9228	4.9217	5.1075	4.114	4.5172	5.2253
metab_5955	7-HYDROXY-8,4'-DIMETHOXYISOFLAVONE	C17H14O5	5.7304	-	4.6363	4.6394	4.5711	4.3262	4.2262	3.9683	4.1582	4.6834	4.0411	4.6751	4.5936	4.3591	4.6837	4.697	4.8542	4.0059	4.4028	4.997
metab_5975	Tocopheronic acid	C16H22O5	5.6537	Prenol lipids	4.775	4.7669	4.775	4.8945	4.6956	4.8202	4.3537	5.159	4.4198	4.403	4.6599	4.481	4.9121	4.727	4.9329	4.7707	4.7814	4.6519
metab_5978	Peonidin 3-O-glucoside	C22H22O11	5.6537	Flavonoids	4.942	5.0074	4.9776	4.3706	4.7945	5.3325	4.6717	4.6853	4.8971	4.6693	4.6371	5.1358	4.2965	4.8174	4.9361	4.2131	4.3797	3.9263
metab_5979	(+/-)-Naringenin	C15H12O5	5.6537	-	4.2055	4.2636	4.1535	4.3771	3.9781	4.0014	4.1311	4.0259	3.7551	4.0815	3.8698	4.2408	4.4635	4.6519	4.139	3.844	3.845	3.86
metab_6002	3,4,5-trihydroxy-6-(2-methoxy-2-{2-oxo-2H-furo[2,3-h]chromen-8-yl}propoxy)oxane-2-carboxylic acid	C21H22O11	5.5975	-	4.269	4.1462	4.1842	2.9246	2.8972	2.9194	4.2827	3.2219	2.8939	3.944	2.8553	4.2042	4.7002	4.9828	3.5393	2.909	2.8062	2.7946
metab_6003	Lucuminamide	C19H27NO11	5.5904	Organooxygen compounds	4.6313	4.6101	4.6335	4.1361	3.7938	4.3222	4.6236	4.332	4.3043	4.0185	4.4755	4.6297	4.9265	5.1713	4.4412	4.155	3.8058	4.0191
metab_6006	3-Pyridinebutanoic acid	C9H11NO2	5.5868	Pyridines and derivatives	4.9515	4.9115	4.9414	5.5117	5.4239	5.2441	5.1755	4.7904	5.1331	5.0356	4.839	4.949	4.0542	4.5327	4.7065	3.8715	4.4324	3.9381
metab_6047	Alanyl-Isoleucine	C9H18N2O3	5.4712	Carboxylic acids and derivatives	4.5039	4.5808	4.5545	4.7553	4.8409	4.6272	4.3093	4.3985	4.5984	4.7163	4.472	4.3031	4.024	4.1795	4.5227	3.9759	4.4973	4.5504
metab_6051	Diosbulbin D	C19H20O6	5.4661	Naphthopyrans	4.8332	4.8797	4.7839	4.688	4.5214	3.8622	3.8819	4.2581	4.9951	5.1074	5.0453	4.6856	4.9425	5.2145	5.2041	4.531	4.8367	4.9495
metab_6052	HYMECROMONE METHYL ETHER	C11H10O3	5.4661	-	5.2084	5.222	5.2015	4.9931	4.9653	4.7986	4.8669	4.9554	5.3039	5.394	5.3949	5.1363	5.3	5.5387	5.523	5.0175	5.1895	5.2112
metab_6053	2,5-Dihydroxybenzaldehyde	C7H6O3	5.4661	Organooxygen compounds	4.6476	4.7032	4.6751	4.5577	4.5802	4.4589	4.5314	4.5406	4.7657	4.8112	4.8343	4.7021	4.7769	4.9172	4.9109	4.6635	4.7052	4.7119
metab_6072	3'-O-methyl-(-)-epicatechin	C16H16O6	5.4077	-	4.7942	4.8205	4.8097	4.8615	4.3622	4.7606	4.5338	4.4694	4.7732	4.4196	4.8056	4.774	4.9849	4.9269	5.0639	4.8972	4.5496	4.3917
metab_6101	3-Hydroxydodecanedioic acid	C12H22O5	5.3083	Hydroxy acids and derivatives	4.7369	4.7568	4.7597	5.0506	5.0821	4.884	4.8553	4.8241	4.9279	4.855	4.7177	4.647	4.521	4.6467	4.6646	4.5331	4.5812	4.5427
metab_6111	3,4,5-trihydroxy-6-{4-[2-hydroxy-3-(2,4,6-trihydroxyphenyl)propyl]-2-methoxyphenoxy}oxane-2-carboxylic acid	C22H26O12	5.265	-	4.9247	4.9858	4.9686	4.7943	4.551	5.1721	4.8923	5.0235	4.7029	4.678	4.7324	4.9957	5.5753	5.1306	5.0404	4.6787	4.6376	4.7856
metab_6121	Isopentenyl adenosine	C15H21N5O4	5.2401	Purine nucleosides	5.4909	5.5029	5.4734	5.8346	5.9089	5.7175	5.8781	5.8395	5.7354	5.6431	5.538	5.3015	5.0076	5.4668	5.5122	4.2673	4.92	4.8308
metab_6133	Homovanillic acid	C9H10O4	5.2092	Phenols	4.3308	4.3171	4.2779	4.8444	4.2652	4.4559	3.5733	4.3763	3.8698	3.9126	4.3006	4.2913	4.4749	4.312	4.4159	4.2117	4.1957	3.9665
metab_6144	(+)-cis-5,6-Dihydro-5-hydroxy-4-methoxy-6-(2-phenylethyl)-2H-pyran-2-one	C14H16O4	5.1768	Kavalactones	4.971	4.9448	4.9224	3.8311	2.4467	4.1859	3.6509	2.485	4.0728	3.1308	4.6619	4.392	4.8158	5.2756	5.9456	4.8946	2.67	3.4017
metab_6149	Biochanin A 7-(6-malonylglucoside)	C25H24O13	5.1586	Isoflavonoids	5.0953	5.1182	5.0757	5.0115	5.0879	4.7486	5.0637	4.9678	5.0947	5.1355	5.145	4.965	4.922	4.9351	4.8933	5.1618	5.1761	5.1871
metab_6158	Meta-O-Dealkylated flecainide lactam	C15H17F3N2O4	5.1356	Benzene and substituted derivatives	4.3331	4.3781	4.2495	4.4871	4.2529	3.6925	4.3757	4.3164	2.9519	4.0309	4.1763	4.2249	4.8782	4.6067	4.1115	2.8683	3.7115	3.5059
metab_6169	Hydroxyanthraquinone	C14H8O3	5.1225	Anthracenes	4.6348	4.688	4.6126	4.6439	4.3675	4.6654	4.5135	4.3469	4.5604	4.4441	4.6137	4.5532	4.7361	4.6856	4.7586	4.6001	4.4521	4.504
metab_6172	6,7-Benzocoumarin	C13H8O2	5.1155	-	3.888	3.88	3.9151	3.4701	3.688	3.9719	3.7176	3.4153	3.7424	3.4767	3.896	3.7924	3.8219	3.9596	3.8354	3.6793	3.4441	3.6458
metab_6177	5,7,9,11,13-tetradecapentaenoic acid	C14H18O2	5.0901	-	4.7599	4.8088	4.7974	5.1944	4.9466	4.8814	4.478	4.6945	4.6049	4.7872	4.5894	4.589	4.7124	4.8325	4.7206	4.5129	4.7907	4.5665
metab_6178	Ixocarpalactone A	C28H40O8	5.085	Steroids and steroid derivatives	5.0581	5.0031	4.9942	4.8237	4.8755	5.0083	4.3792	5.1734	4.9421	4.7661	4.5003	4.8282	5.4586	5.4835	5.112	5.181	4.5311	4.4921
metab_6180	L-Thyronine	C15H15NO4	5.0804	Carboxylic acids and derivatives	3.8056	3.9565	3.8969	1.5365	1.5099	1.5411	1.4794	1.8313	2.3939	1.4905	1.4693	3.5144	4.6245	5.069	4.6935	1.4259	1.797	1.4108
metab_6186	Safflomin C	C30H30O14	5.0616	Diarylheptanoids	4.2351	4.1018	4.2327	3.0391	3.0117	3.6931	4.412	3.0406	4.2432	2.9917	2.9698	4.4547	3.7618	4.8741	4.4145	4.785	2.9207	2.9091
metab_6191	2,4,6-trihydroxy-2-[hydroxy(4-hydroxyphenyl)methyl]-2,3-dihydro-1-benzofuran-3-one	C15H12O7	5.0529	-	4.1727	4.2129	4.1451	4.5028	3.5518	4.3625	4.0037	5.0442	3.9815	4.432	3.79	3.7372	4.0897	3.8505	4.4029	2.9481	3.2593	2.6403
metab_6207	Alpha-Hydroxy-1-methyl-1H-indole-3-propanoic acid	C12H13NO3	4.9982	Indoles and derivatives	4.629	4.615	4.6399	5.2065	5.2099	5.0089	4.7052	5.1491	4.7308	5.0143	4.4745	4.5357	4.2278	4.6069	4.5657	3.706	4.1963	3.7976
metab_6211	6-Hydroxymelatonin glucuronide	C19H24N2O9	4.9783	Organooxygen compounds	4.1883	4.2851	4.1913	5.1819	4.6523	4.4067	4.463	4.3183	4.0366	2.8137	2.7521	2.7561	4.3771	4.2323	4.3892	3.9109	4.0922	4.0314
metab_6220	Alanyl-Leucine	C9H18N2O3	4.9593	Carboxylic acids and derivatives	4.8101	4.842	4.8335	5.1912	5.2191	5.001	4.8391	4.9193	5.0477	5.0187	4.7705	4.5538	4.1961	4.3952	4.7909	4.1654	4.7276	4.6268
metab_6225	Valyl-Valine	C10H20N2O3	4.9444	Carboxylic acids and derivatives	5.455	5.4156	5.4345	5.6195	5.7901	5.6287	5.2611	5.237	5.5575	5.2722	5.473	5.3659	5.0372	5.2944	5.2372	5.2041	5.2777	5.1316
metab_6226	Luteolin 7-(2''-glucuronosyllactate)	C24H22O14	4.9388	-	3.8943	3.6994	3.8171	5.044	3.2848	4.158	5.1739	4.8828	4.5342	3.4227	4.0636	5.2053	5.3242	5.3808	5.5059	5.2508	3.2408	4.0661
metab_6234	Dichotosin	C23H28O9	4.9083	-	5.1403	5.1214	5.0951	4.8942	4.9526	4.7467	5.2747	5.2764	5.0984	4.8613	5.3099	5.0892	4.7461	5.0334	4.777	5.0333	4.8778	4.8733
metab_6239	Pro Ala Pro Thr	C17H28N4O6	4.9018	-	4.6	4.5729	4.5675	4.969	4.925	4.9373	4.5872	4.585	4.7016	4.3691	4.6194	4.3225	3.5867	4.3612	4.3819	3.0836	3.9246	3.515
metab_6248	3-Methylindole	C9H9N	4.8953	Indoles and derivatives	4.1613	4.1451	4.1432	4.0323	3.6083	3.3855	4.3618	3.5479	3.6493	3.4041	3.7098	4.6553	4.2793	4.164	4.241	4.1097	3.5521	2.9818
metab_6258	Putreanine	C7H17N2O2+	4.8746	Carboxylic acids and derivatives	3.8648	3.7202	3.6462	4.2271	4.4753	4.525	3.75	3.9026	3.8162	4.0964	4.1004	3.7163	2.978	3.3286	3.2539	2.931	2.9269	2.9153
metab_6269	Apiin	C26H28O14	4.8361	Naphthalenes	4.8043	4.784	4.7524	4.7188	4.6062	4.5807	4.1716	4.7283	4.8054	4.7335	4.3367	4.948	4.5308	4.4182	5.3025	4.0899	3.8364	4.42
metab_6273	Ala Lys Val	C14H28N4O4	4.8249	-	4.3985	4.3128	4.3204	4.9286	4.641	4.7718	4.3773	4.5197	4.6977	4.4246	4.1866	3.8621	2.7605	4.1119	4.096	2.7136	3.0423	3.46
metab_6276	Seryltyrosine	C12H16N2O5	4.8208	Carboxylic acids and derivatives	3.9715	4.0132	3.9009	3.3742	3.5726	2.8841	3.5431	3.0732	3.4958	4.3298	3.8329	4.1695	3.9327	4.397	4.1471	4.8065	4.4677	4.0933
metab_6285	3-Hydroxynevirapine glucuronide	C21H22N4O8	4.7661	Organooxygen compounds	5.8035	5.7791	5.8273	5.2853	5.2386	5.8518	6.1467	5.1298	4.8272	5.0257	3.9608	5.5187	6.3161	5.8328	5.5055	4.6132	4.5177	4.6584
metab_6292	N-lactoyl-Leucine	C9H17NO4	4.755	Carboxylic acids and derivatives	4.6295	4.6997	4.7201	5.1137	4.981	4.9254	4.8344	4.9003	4.9331	5.0878	4.6494	4.607	4.5304	4.5983	4.5808	4.5129	4.5965	4.5299
metab_6314	3,4,5-trihydroxy-6-{[5-(4-methoxyphenyl)-3-oxopentan-2-yl]oxy}oxane-2-carboxylic acid	C18H24O9	4.6908	-	5.0543	5.018	5.088	5.1666	5.4683	5.4151	4.7248	4.8599	5.1835	4.9782	4.7956	5.1289	5.1805	4.7609	4.4918	5.0769	4.7827	4.3361
metab_6329	3,4,5-trihydroxy-6-{[(4E)-5-(4-methoxyphenyl)-3-oxopent-4-en-2-yl]oxy}oxane-2-carboxylic acid	C18H22O9	4.6377	-	4.9866	4.9354	5.0312	5.0229	5.4278	5.2538	5.1499	5.0966	5.0731	4.7534	4.4282	4.9007	4.954	4.6488	4.7974	5.1095	5.0577	4.6043
metab_6334	Camaroside	C23H24O11	4.6201	-	5.3111	5.3311	5.355	5.0925	4.6756	4.7277	5.0499	5.5332	4.9312	5.3694	5.3739	5.1945	5.4308	5.366	5.6756	5.0127	5.1983	5.3367
metab_6336	4',5'-Dihydroxy-7-methoxy-5,2'-oxido-4-phenylcoumarin	C16H10O6	4.6135	-	4.2129	4.5052	4.4121	4.514	3.698	4.4279	4.4267	4.4342	4.2792	4.5156	4.7014	4.4954	4.7389	4.6342	4.8173	4.1808	4.1598	4.4217
metab_6340	Thr His Gly Arg	C18H31N9O6	4.6065	-	5.267	5.2457	5.2996	5.3335	5.3609	5.6437	5.6766	5.4787	5.2408	5.2482	5.1064	5.0945	5.0465	5.2614	5.2464	4.7118	5.0883	4.8465
metab_6351	3-(4-Hydroxyphenyl)-1-propanol	C9H12O2	4.5874	Phenols	4.5726	4.5482	4.5614	4.6357	4.4645	4.5663	4.7541	4.6814	4.6119	4.5851	4.4525	4.6906	4.3949	4.5838	4.5583	4.4163	4.484	4.4183
metab_6366	1-Hydroxyepiacorone	C15H24O3	4.5604	Organooxygen compounds	4.6319	4.5525	4.5868	5.0625	5.0499	4.9468	4.6752	4.5695	4.8225	4.6233	4.7474	4.4864	3.8336	4.3112	4.4033	3.5374	4.2576	3.7048
metab_6376	Gly Val Leu Thr	C17H32N4O6	4.5274	-	5.6586	5.6205	5.6257	6.2536	5.8973	6.0823	5.829	5.5217	5.6739	5.4506	5.8095	5.5031	4.6883	5.3406	5.4208	4.7254	5.4006	5.0321
metab_6379	(Z)-6-(2-Methoxyvinyl)-7-methyl-2H-1-benzopyran-2-one	C13H12O3	4.5198	Coumarins and derivatives	3.9763	3.9956	3.9967	3.6	2.4005	4.1997	3.6821	2.7539	3.7045	3.4456	3.7981	4.0431	4.4207	4.4507	4.661	4.173	2.934	3.7407
metab_6393	Ile Trp	C17H23N3O3	4.4696	-	4.5978	4.5446	4.571	5.25	4.8308	4.9638	4.7469	4.6949	4.7196	4.3833	4.2851	4.2667	4.2441	4.2064	3.8928	4.208	4.0388	3.9739
metab_6398	5-hydroxy-8-(hydroxymethyl)-8-methyl-6-(2-methylpropanoyl)-4-phenyl-2H,8H-pyrano[2,3-f]chromen-2-one	C24H22O6	4.4398	-	4.8835	4.8574	4.8971	5.108	4.9953	4.9853	4.8338	4.6722	4.9312	4.3135	4.3841	4.6789	5.3543	4.7165	5.2474	3.8859	4.1897	4.2937
metab_6401	3-Hydroxymethylantipyrine	C11H12N2O2	4.4326	Azoles	3.7534	3.761	3.7597	3.0571	3.2328	3.325	3.533	3.1163	2.9987	3.3177	2.673	2.6759	4.125	4.6872	4.5493	2.0904	3.0738	2.8641
metab_6423	4-hydroxy ketorolac	C15H13NO4	4.3586	Organooxygen compounds	4.8865	4.8612	4.8773	4.7465	4.4441	4.8525	4.5856	4.7675	4.7683	4.7079	4.846	4.9324	5.1626	5.0163	5.3026	4.9772	5.2074	4.3871
metab_6429	P-Coumaraldehyde	C9H8O2	4.3481	Cinnamaldehydes	4.5907	4.589	4.584	4.7694	3.7663	4.6451	4.6562	4.5531	4.5521	3.6678	4.5623	4.8872	4.8808	4.9447	5.1309	5.0568	3.8457	4.1563
metab_6433	4-Hydroxy-3-methoxycinnamaldehyde	C10H10O3	4.3353	Phenols	4.1427	4.1512	4.1578	4.1539	3.9311	4.2927	4.3103	4.0672	3.9098	4.1152	4.075	4.2024	4.2605	4.1961	4.1834	3.9999	4.0397	3.986
metab_6449	2'-Hydroxy-4',6'-dimethoxy-3'-methylacetophenone	C11H14O4	4.2931	-	4.0826	4.0771	4.0519	3.458	3.6696	4.5185	4.5435	2.6026	2.9314	3.7459	3.3391	3.7588	4.3012	4.1095	3.8472	3.2804	3.1087	3.2008
metab_6453	2-Indanone	C9H8O	4.2798	-	4.7818	4.843	4.8199	5.1568	4.5806	4.8742	4.962	5.039	4.9793	4.5672	4.8274	4.7139	4.5783	4.5773	4.8841	4.6043	4.8655	4.7691
metab_6459	3-Methyl-1-phenyl-1-butanone	C11H14O	4.2729	-	4.5159	4.5965	4.5808	4.7547	4.8338	3.9421	4.024	4.0381	3.9971	4.1181	4.9936	4.6792	5.0672	5.091	4.368	4.9885	3.7888	3.7774
metab_6477	Thr Ile Glu	C15H27N3O7	4.2453	-	4.7635	4.7302	4.737	4.4617	4.7431	4.7668	4.923	4.7609	4.8096	4.7177	4.4857	4.7734	4.5768	4.468	4.4412	4.7259	4.8107	4.8585
metab_6479	Leu Val Ser Lys	C20H39N5O6	4.2366	-	4.0463	3.9322	3.9413	2.8719	2.8445	2.8668	2.9478	3.4635	2.8412	2.8245	4.0846	3.4894	2.8046	2.8109	2.8573	3.8003	3.8007	3.9439
metab_6491	6-{[3-(1,2-dihydroxybutyl)-1-oxo-1H-isochromen-7-yl]oxy}-3,4,5-trihydroxyoxane-2-carboxylic acid	C19H22O11	4.2135	-	4.8429	4.7629	4.7683	4.5598	5.0667	5.0496	4.7199	4.8569	5.0223	4.6116	4.53	5.0808	4.6342	4.2281	4.5	4.436	4.3276	4.1898
metab_6498	3-O-Benzyl-4,5-O-(1-methylethyldiene)-b-D-fructopyranose	C16H22O6	4.188	-	4.3929	4.3167	4.3428	4.9576	4.6194	4.5984	4.2776	4.5006	4.3285	3.957	4.1953	3.7244	4.2529	4.2117	4.395	3.9629	4.0078	3.5665
metab_6506	3-Coumaric Acid	C9H8O3	4.1584	-	4.9479	4.9895	4.9509	5.1634	4.9729	5.2448	5.0521	5.0792	4.8853	4.9911	4.908	4.8494	5.0275	5.1004	4.8899	4.6978	4.8411	4.6522
metab_6511	3,4,5-trihydroxy-6-{[(2E)-3-(3-hydroxyphenyl)prop-2-enoyl]oxy}oxane-2-carboxylic acid	C15H16O9	4.1507	-	4.5467	4.5935	4.5957	4.8089	4.6078	4.8998	4.6693	4.6992	4.4794	4.6041	4.5099	4.4078	4.6452	4.7237	4.4125	4.0915	4.3996	4.0348
metab_6529	3'-Azido-3'-deoxy-5'-O-beta-D-glucopyranuronosylthymidine	C16H21N5O10	4.0921	-	4.9118	4.9051	4.8867	5.0319	5.1107	5.1719	4.7047	4.6007	5.0874	4.8711	4.801	4.9373	5.0616	4.9225	4.8621	4.5071	4.4982	4.4415
metab_6543	Diffutin	C23H28O10	4.0612	-	5.0007	4.9678	4.9669	4.9764	5.165	5.26	4.8992	4.7316	5.3281	4.7446	5.3339	4.7137	4.62	4.9357	4.9398	4.6661	4.2516	4.3867
metab_6547	Jasmolone	C11H16O2	4.0612	Organooxygen compounds	4.3218	4.3167	4.3076	4.2415	4.0949	4.2158	4.3887	4.3384	4.3712	4.3909	4.2228	4.4187	4.3502	4.195	4.3976	4.4582	4.2554	4.3186
metab_6555	Mono-methyl-adipate	C7H12O4	4.0373	Fatty Acyls	4.3334	4.3597	4.3148	4.2667	4.7991	4.5531	4.2246	4.5611	4.1465	4.2043	4.3066	4.2578	4.0508	4.3865	4.101	3.9832	3.9297	4.1072
metab_6562	3-Caren-5-one	C10H14O	4.0296	Prenol lipids	4.1836	4.1924	4.135	4.1659	4.1908	3.8056	4.0286	4.3434	4.1882	4.194	4.3501	4.1534	4.206	3.9105	4.0439	4.0278	3.7082	3.7103
metab_6597	1-(1,2,3,4,5-Pentahydroxypent-1-yl)-1,2,3,4-tetrahydro-beta-carboline-3-carboxylate	C17H22N2O7	3.951	Benzopyrans	4.9933	5.0134	4.9738	5.2017	5.1275	5.2979	4.9375	4.6818	4.9466	4.857	5.0337	4.5519	4.8251	5.0602	4.9519	4.475	4.9323	4.9107
metab_6599	2-Methylacetophenone	C20H38O7S	3.9465	Organooxygen compounds	5.2036	5.1659	5.1359	4.5491	4.5914	4.9395	5.1939	5.1816	4.9243	4.7058	5.0638	5.0435	5.3922	5.0754	5.1614	5.1847	5.4301	5.3049
metab_6602	Riboflavin (Vitamin B2)	C17H20N4O6	3.9336	-	4.5992	4.6057	4.58	5.2763	5.1401	5.0771	4.9521	5.0826	4.7815	5.2163	4.4927	4.64	4.4583	4.412	5.2136	4.4383	4.1809	3.8672
metab_6607	Epi-4'-hydroxyjasmonic acid	C12H18O4	3.9238	-	4.5879	4.574	4.5826	4.8022	4.6967	4.8388	4.6653	4.6057	4.5279	4.3651	4.9573	4.3002	4.5829	4.5523	4.7651	4.373	4.2887	4.2549
metab_6624	Glycylprolylhydroxyproline	C12H19N3O5	3.8848	Carboxylic acids and derivatives	4.6238	4.5472	4.571	4.7509	4.6805	4.7508	4.8433	4.6573	4.3942	4.3556	4.4162	4.7276	4.4188	4.0657	4.1864	4.0513	4.2307	4.0317
metab_6634	Glutamyltyrosine	C14H18N2O6	3.8582	Carboxylic acids and derivatives	4.7601	4.768	4.7443	5.0994	5.1041	5.1938	4.9179	4.715	4.7478	4.9756	4.4238	4.6857	4.6845	4.6382	4.9182	3.2479	3.8074	3.9084
metab_6640	4-Hydroxytamoxifen-N-glucuronide	C30H33NO9	3.8367	Stilbenes	5.0223	4.9746	4.9734	4.5657	4.7227	4.7899	5.195	5.1638	4.6801	5.3561	4.9558	5.1823	5.0489	5.0619	5.1875	5.0081	5.0227	4.7149
metab_6645	Pro Trp	C16H19N3O3	3.827	-	4.8206	4.7993	4.7942	5.104	4.9808	4.9809	5.1368	4.9239	4.7504	4.8308	4.3593	4.8382	4.303	4.6625	4.4879	4.7614	4.9368	4.1848
metab_6646	NH-DVal(NMe)-Val-OMe	C12H24N2O3	3.827	-	4.2606	4.2754	4.2471	4.7619	4.6225	4.593	4.5187	4.5289	4.4252	3.9962	4.0687	4.0782	3.9783	4.0131	3.9394	3.7814	3.8377	3.6632
metab_6659	4-Formyl-3-(formylmethyl)-4-hexenoic acid	C9H12O4	3.805	Fatty Acyls	4.6842	4.7112	4.6851	4.6421	4.6338	4.5489	4.5866	4.6668	4.6499	4.7447	4.7319	4.8293	4.7328	4.7188	4.7326	4.7494	4.8028	4.8385
metab_6674	Val Phe	C14H20N2O3	3.7742	-	4.8298	4.8274	4.8573	5.4378	5.1813	5.1674	5.1563	5.1249	5.0755	4.6944	4.4437	4.6389	4.5392	4.513	4.2438	4.4514	4.4041	4.2514
metab_6680	1-Phenylethyl acetate	C10H12O2	3.7528	Benzene and substituted derivatives	4.9634	4.9913	5.004	5.081	5.2491	5.2503	4.9943	4.8768	5.3804	4.8527	5.3262	4.8092	4.7417	4.9365	5.0203	4.8138	4.5939	4.6279
metab_6684	Thr Trp	C15H19N3O4	3.7421	-	4.7388	4.7269	4.7792	4.984	4.8544	4.8002	4.7669	4.724	4.7228	4.7931	4.7461	4.7174	4.5828	4.697	4.5559	4.5541	4.7557	4.4916
metab_6689	(2xi,4xi)-4,4',5,7-Tetrahydroxyflavan	C15H14O5	3.7273	-	4.4821	4.4999	4.51	4.3551	4.4107	4.5675	4.2379	4.1732	4.0282	4.3929	4.525	4.2471	4.6654	4.6513	4.8381	4.1723	4.2099	4.0643
metab_6692	Alanyl-Tryptophan	C14H17N3O3	3.7227	Carboxylic acids and derivatives	4.7218	4.6813	4.7067	4.9942	4.8679	4.8514	4.8765	4.8181	4.7753	4.6197	4.5385	4.6466	4.4249	4.595	4.4113	4.3431	4.5631	4.3379
metab_6697	Dynorphin B (6-9)	C26H43N11O6	3.7167	Carboxylic acids and derivatives	5.1571	5.1908	5.2066	5.5797	5.3123	5.609	5.637	5.2402	5.2562	5.0606	5.1141	4.918	3.9838	4.5846	4.9745	3.8157	5.0639	4.4624
metab_6699	11,13-Dihydrotaraxinic acid glucosyl ester	C21H30O9	3.7125	Saccharolipids	5.1106	5.0537	5.1091	4.8341	4.3145	4.1431	5.3631	4.2976	4.2005	3.7238	4.5011	5.6244	5.3599	5.0639	5.131	4.7548	4.4241	3.9009
metab_6703	Glu Phe	C14H18N2O5	3.7094	-	5.4668	5.4715	5.5055	5.5312	5.3326	5.5902	5.3386	5.5978	5.2191	5.4696	5.5157	5.4719	5.609	5.6804	5.3011	4.9655	5.2164	5.0895
metab_6716	Asn Trp	C15H18N4O4	3.6609	-	4.736	4.7218	4.6979	4.9356	4.8796	4.8168	4.827	4.8258	4.7457	4.7784	4.6641	4.633	4.4235	4.6246	4.6171	4.5177	4.6092	4.5174
metab_6717	Aspartyl-Isoleucine	C10H18N2O5	3.6522	Carboxylic acids and derivatives	3.8756	3.8102	3.8746	2.8961	3.1676	3.2202	3.2313	3.279	3.1624	2.9022	2.711	2.8391	4.1683	4.8228	4.3787	2.4393	2.4352	3.146
metab_6721	2-Methoxyhydroquinone	C7H8O3	3.6471	-	3.9657	3.9733	3.9545	3.861	3.7926	3.9454	3.7495	4.1095	3.8338	4.0939	3.9591	3.7547	4.139	4.0571	3.9839	3.7545	3.6806	3.9145
metab_6735	O-malonyl-L-carnitine	C10H17NO6	3.605	Fatty Acyls	4.2224	4.2573	4.2195	4.3379	4.4242	4.4718	4.2497	4.2141	4.2368	4.6872	4.085	4.2066	4.1045	4.222	4.251	3.9864	4.159	4.1854
metab_6748	Thr Ala Thr Leu	C17H32N4O7	3.5723	-	5.1959	5.1344	5.1542	5.5983	5.6719	5.5307	5.2824	5.0644	5.2654	4.8487	5.1977	4.933	4.3109	4.7626	4.6452	3.9331	4.4748	4.2981
metab_6770	Ser Val Lys	C14H28N4O5	3.5033	-	4.9139	4.8485	4.8699	5.3268	5.3744	5.1905	4.8512	4.942	5.0861	4.8211	4.7192	4.5556	3.9083	4.5299	4.4991	3.3377	4.2261	4.1441
metab_6777	(1x,2x)-Guaiacylglycerol 3-glucoside	C16H24O10	3.4947	Fatty Acyls	4.5847	4.629	4.5775	4.1159	4.441	4.0749	4.2698	4.4659	4.8783	4.3733	4.5358	4.6479	4.9507	4.1254	4.5458	5.0558	4.7708	4.7975
metab_6779	Tyr Leu	C15H22N2O4	3.4947	-	4.5154	4.4911	4.5032	4.8112	4.7463	4.6868	4.7249	4.5705	4.6019	4.282	4.3432	4.2688	4.2396	4.2151	4.1332	4.1578	4.2021	4.0964
metab_6791	Corey Lactone Aldehyde Benzoate	C15H14O5	3.4606	-	4.2454	4.3425	4.2616	4.2991	4.0408	4.0812	4.2229	3.7163	3.4187	4.0981	4.422	4.1271	4.4526	4.2892	4.4873	3.9845	3.5591	4.0565
metab_6792	Sepiapterin	C9H11N5O3	3.4606	Pteridines and derivatives	4.0928	4.1427	4.0717	3.766	4.0326	3.906	3.4478	3.7979	3.6109	4.5952	4.0732	4.0525	3.9372	3.9722	3.9653	3.8272	4.1521	4.2118
metab_6795	N-Succinyl-L,L-2,6-diaminopimelate	C11H18N2O7	3.4543	Carboxylic acids and derivatives	4.5698	4.5778	4.5318	4.0565	4.0291	4.0514	3.9976	4.0343	4.0258	4.0091	3.9872	3.9913	4.9344	5.4913	5.1436	3.9421	3.938	3.9264
metab_6805	Oryzalide A	C19H28O4	3.4411	Prenol lipids	5.0047	4.8925	4.9621	5.5402	5.4785	5.163	5.3026	4.6737	5.0414	5.1134	4.9115	5.0619	3.9854	4.5161	4.4888	3.4936	4.6312	3.9548
metab_6811	3,4-Dihydroxyphenylvaleric acid	C11H14O4	3.4236	Phenols	4.1851	4.1621	4.1936	4.8073	4.4709	4.7627	4.0726	4.2827	3.9986	4.0065	4.1611	3.526	4.0832	3.9994	4.068	4.0146	4.0013	3.6094
metab_6815	L-Tyrosine	C9H11NO3	3.4186	Carboxylic acids and derivatives	4.2707	4.29	4.2765	4.3666	4.2786	4.3107	4.2504	4.2204	4.3194	4.4249	4.4461	4.3912	4.3377	4.363	4.3011	4.3667	4.4723	4.4142
metab_6831	Wampetin	C21H18O6	3.3728	Coumarins and derivatives	4.3534	4.4102	4.2665	4.7834	4.8448	4.5472	4.1734	4.4233	4.2531	3.6616	3.7069	3.3275	5.1078	4.3497	3.8636	2.7994	2.7953	3.9608
metab_6837	3,4,5-trihydroxy-6-(3-methyl-2-oxo-4-phenylbutoxy)oxane-2-carboxylic acid	C17H22O8	3.359	-	4.1739	4.4546	4.3125	4.9331	4.9694	5.2038	4.6678	4.8984	3.6962	3.9938	3.6576	3.765	3.6596	4.3519	4.0428	4.6087	4.0744	3.5969
metab_6867	Homoanserine	C11H18N4O3	3.2904	Peptidomimetics	5.414	5.4209	5.4316	4.7489	5.1984	5.0979	5.2599	5.2926	5.1805	5.4449	5.557	5.3477	5.5124	5.3441	5.5505	5.4157	5.1996	5.459
metab_6883	Gly Phe	C11H14N2O3	3.2645	-	5.0748	4.976	5.0264	5.1832	5.1935	5.2072	4.9963	5.0671	4.9873	5.1088	4.9928	4.8918	4.8037	4.9008	4.8484	4.7327	4.8322	5.0307
metab_6893	(S)-ATPA	C10H16N2O4	3.2462	-	4.2179	4.1871	4.1774	4.3435	4.2592	4.3784	4.0634	4.1876	4.1025	4.3502	4.218	4.3205	4.1347	3.9566	3.9152	3.8823	4.005	4.1609
metab_6897	2-Hydroxy-3-carboxy-6-oxo-7-methylocta-2,4-dienoate	C10H12O6	3.2396	-	4.5079	4.4059	4.4463	4.2	4.0857	4.3205	4.5195	4.1407	4.4698	4.3583	4.6737	4.5849	4.7198	4.2284	4.5615	4.5861	4.3916	4.4364
metab_6899	2,6-Dimethoxy-1,4-benzoquinone	C8H8O4	3.2396	Organooxygen compounds	3.9076	3.7876	3.8725	2.8965	3.363	3.5063	3.2373	3.0588	3.9553	3.4773	4.0458	3.764	3.6225	3.0286	3.6415	4.1099	3.8863	4.7944
metab_6905	Glu His Leu	C17H27N5O6	3.2254	-	4.8265	4.7391	4.7775	5.0698	4.876	4.9628	4.5789	4.8846	5.1243	4.3258	4.9305	4.7444	4.2339	4.237	4.1322	3.7485	4.3649	3.9462
metab_6908	Histidinyl-Arginine	C12H21N7O3	3.2254	Carboxylic acids and derivatives	4.5238	4.4769	4.4791	4.6875	4.648	4.6353	4.5841	4.6029	4.6608	4.5153	4.3815	4.5781	4.1882	4.4689	4.4375	4.0493	4.1211	4.5144
metab_6919	Peonidin-3-O-Beta-Galactoside	C22H22O11	3.2113	-	4.5274	4.5556	4.5173	4.5108	3.6218	4.9126	4.2884	3.7798	4.293	4.1927	4.4621	4.0342	4.8868	4.9928	5.2236	3.9872	3.4725	4.0111
metab_6920	6-{[3-(2,4-dihydroxy-5-methoxyphenyl)propanoyl]oxy}-3,4,5-trihydroxyoxane-2-carboxylic acid	C16H20O11	3.2113	-	5.5549	5.4971	5.5217	5.6281	5.376	5.4889	5.5552	5.7672	5.7087	5.0912	5.3025	5.5594	5.5194	5.4492	5.5122	5.5176	5.2875	5.3732
metab_6923	Ile Tyr	C15H22N2O4	3.2077	-	4.411	4.3842	4.352	5.0011	4.5958	4.5515	4.5117	4.627	4.4545	4.1376	4.0074	3.9094	4.2263	4.211	4.0279	4.2858	4.1371	4.1279
metab_6927	3-Hydroxy-p-mentha-1,8-dien-7-al	C10H14O2	3.199	Prenol lipids	4.136	4.0754	4.1054	4.4918	4.9181	4.3197	4.4221	4.4149	4.4642	4.8293	3.8759	4.0091	3.474	3.994	3.8795	2.7047	4.0933	3.7156
metab_6930	Ser Phe	C12H16N2O4	3.192	-	5.0454	5.0492	5.0313	5.4561	5.3127	5.1561	5.2856	5.2072	5.2258	5.1021	4.8414	4.852	4.6443	4.8249	4.649	4.72	4.8983	4.643
metab_6947	2-amino-4-({1-[(carboxymethyl)-C-hydroxycarbonimidoyl]-2-[(2-{3,5-dihydroxy-4-[(1E)-3-methylbut-1-en-1-yl]phenyl}-2-hydroxy-1-(4-hydroxyphenyl)ethyl)sulfanyl]ethyl}-C-hydroxycarbonimidoyl)butanoic acid	C29H37N3O10S	3.1628	-	4.9964	4.9094	4.9475	5.037	5.139	5.1046	5.4242	5.5485	5.1809	5.2879	4.9413	4.8841	4.3948	4.8936	5.0677	4.1622	4.2412	4.1465
metab_6951	5'-Deoxy-5'-(methylthio)adenosine	C11H15N5O3S	3.1526	-	6.057	6.0267	6.0715	6.008	6.0491	5.9974	5.841	5.9135	5.9496	6.0489	6.0081	6.163	6.1165	6.1583	5.9206	6.2115	5.8411	6.1467
metab_6953	CL(8:0/11:0/11:0/18:2(9Z,11Z))	C57H106O17P2	3.1449	Glycerophospholipids	5.6822	5.5946	5.6452	5.9648	5.6719	6.0685	5.2324	4.959	5.5154	5.547	5.5724	5.8175	5.4813	5.2344	5.2638	5.4475	5.3211	5.4945
metab_6956	Vanillactic acid	C10H12O5	3.1388	Phenylpropanoic acids	4.5867	4.5996	4.5913	4.5601	4.4567	4.6803	4.3985	4.6237	4.6124	4.6286	4.5771	4.5765	4.6698	4.6635	4.7393	4.5131	4.293	4.3721
metab_6961	N-lactoyl-phenylalanine	C12H15NO4	3.1328	Carboxylic acids and derivatives	4.4404	4.4335	4.4422	4.2951	4.1802	4.3848	3.3652	4.0346	4.0002	4.851	4.2748	4.1695	4.5392	4.7527	4.7754	4.2507	4.4993	4.1445
metab_6967	Leu Glu Gly	C13H23N3O6	3.1216	-	4.7207	4.6942	4.6942	5.1948	4.6786	4.9652	4.6479	4.5503	4.7154	4.6669	4.4985	4.5416	4.5977	4.7565	4.2748	4.409	4.4638	4.3395
metab_6999	4-Acetamido-2-aminobutanoic acid	C6H12N2O3	3.0523	Carboxylic acids and derivatives	4.4031	4.4313	4.3989	4.6702	4.7035	4.5658	4.5068	4.5849	4.4828	4.3714	4.1243	4.5582	4.0653	3.8783	3.9263	3.7678	4.0943	4.003
metab_7003	Isoleucyl-Hydroxyproline	C11H20N2O4	3.0415	Carboxylic acids and derivatives	4.5445	4.538	4.5526	4.8128	4.4281	4.7226	4.4896	4.6096	4.7438	4.0497	4.6622	4.1636	4.1745	4.8803	3.9834	4.1589	4.0322	3.546
metab_7009	Ile Pro	C11H20N2O3	3.0323	-	6.3768	6.3378	6.3605	6.6058	6.6063	6.5895	6.5281	6.354	6.3406	6.2996	6.0969	6.2845	6.1084	6.2008	6.0552	6.1754	6.1729	6.1271
metab_7017	3,4,5-trihydroxy-6-{[3-(4-methoxyphenyl)-2-oxopropanoyl]oxy}oxane-2-carboxylic acid	C16H18O10	3.0105	-	4.2204	4.24	4.2266	4.0992	4.0968	4.2447	3.5409	3.7602	4.2506	3.7298	4.0366	4.4308	4.4407	4.4688	4.8587	4.2448	4.1576	4.0912
metab_7032	Asn Leu	C10H19N3O4	2.9891	-	4.9434	4.9553	4.9323	5.2398	5.1895	5.0814	5.2336	5.1749	5.0774	4.9079	4.7778	4.8497	4.5826	4.8023	4.7451	4.6315	4.6002	4.3846
metab_7047	Gly Leu	C8H16N2O3	2.9659	-	4.7392	4.6976	4.7342	4.932	4.8771	4.8517	4.7465	4.6638	4.6991	4.6965	4.7064	4.6019	4.5871	4.6792	4.5566	4.5057	4.6049	4.6382
metab_7053	1-Hydroxypyrene glucuronide	C22H18O7	2.9554	Pyrenes	4.3627	4.3312	4.3126	4.4708	4.5414	4.4214	4.0897	4.7743	3.7604	3.8538	3.5407	4.1034	4.3012	4.2012	4.0778	2.9878	2.9216	3.4234
metab_7057	Succinoadenosine	C14H17N5O8	2.9413	Purine nucleosides	6.4156	6.3768	6.3841	6.1611	6.2061	6.1451	6.0291	6.2017	6.2163	6.4036	6.2724	6.509	6.3445	6.3968	6.1485	6.5378	6.4249	6.5819
metab_7058	Galactaric acid	C6H10O8	2.9413	Organooxygen compounds	5.8939	5.8539	5.8703	5.6274	5.6791	5.6143	5.5157	5.6795	5.6953	5.8845	5.7533	5.9818	5.8311	5.8838	5.6297	6.0234	5.9277	6.0791
metab_7065	His Trp	C17H19N5O3	2.9267	-	4.981	4.9751	4.9168	5.1527	5.031	5.0793	4.998	5.0091	4.8418	4.8471	4.9755	4.8747	4.7118	4.896	4.7807	4.7948	4.8562	4.7085
metab_7085	Tyrosyl-Proline	C14H18N2O4	2.9069	Carboxylic acids and derivatives	4.9192	4.9588	4.8974	5.1251	5.0679	5.1156	5.0696	4.8678	4.8395	4.8831	4.7394	4.9237	4.5917	4.7619	4.5973	4.7832	4.8211	4.7699
metab_7100	Methionyl-Asparagine	C9H17N3O4S	2.8842	Carboxylic acids and derivatives	4.6296	4.6317	4.5971	4.805	4.7349	4.9102	4.7867	4.4	4.773	4.6	4.5589	4.7436	4.484	4.0573	4.3154	4.4667	4.2509	4.2719
metab_7101	N,N-Dihydroxy-L-tyrosine	C9H11NO5	2.8842	Carboxylic acids and derivatives	4.618	4.6446	4.599	4.8207	4.9807	4.9984	4.6638	4.5051	4.7305	5.1219	4.2717	4.5382	4.3408	4.3856	4.4279	4.1978	4.5407	4.464
metab_7103	2-(acetylamino)-1,5-anhydro-2-deoxy-3-O-b-D-galactopyranosyl-D-arabino-Hex-1-enitol	C14H23NO10	2.8772	Organooxygen compounds	5.0843	5.1218	5.046	5.1628	5.4876	5.3117	5.1413	5.2461	5.0317	5.5569	4.4157	4.7649	4.6995	4.6935	4.8265	4.1571	5.2914	4.8013
metab_7130	N2,N2-Dimethylguanosine	C12H17N5O5	2.8491	Purine nucleosides	6.112	6.1053	6.1022	6.3573	6.3734	6.3996	5.741	6.068	5.7483	5.8133	5.9595	5.8292	6.5647	6.0221	6.1027	5.5838	5.7096	5.928
metab_7157	Phe Lys	C15H23N3O3	2.8422	-	4.7311	4.7429	4.782	5.0483	5.0301	5.0042	5.1688	5.0511	4.9851	4.6484	4.6291	4.6458	4.514	4.6338	4.7477	4.2954	4.5673	4.177
metab_7160	Methionyl-Hydroxyproline	C10H18N2O4S	2.8422	Carboxylic acids and derivatives	5.5271	5.5354	5.5201	5.8282	5.6802	5.8336	5.2328	5.3642	5.3481	5.4049	5.494	5.4049	5.3985	5.4375	5.333	5.5297	5.5361	5.6236
metab_7161	Gly Tyr	C11H14N2O4	2.8422	-	4.9265	4.9704	4.909	5.0336	4.8383	4.9445	4.8255	4.8076	4.7991	4.9674	4.9921	4.8534	4.9076	4.9794	4.951	4.9603	5.0202	5.1925
metab_7172	Xi-4-Hydroxy-4-methyl-2-cyclohexen-1-one	C7H10O2	2.8422	Organooxygen compounds	4.7762	4.8286	4.7989	4.9802	4.9533	4.9805	4.8788	5.0881	4.7774	4.8196	4.7484	4.7533	4.7175	4.8521	4.7707	4.4851	4.575	4.4845
metab_7186	1,2,3,4,5,6-Hexahydro-5-(1-hydroxyethylidene)-7H-cyclopenta[b]pyridin-7-one	C10H13NO2	2.8281	Pyridines and derivatives	3.9253	3.6627	3.7031	2.5878	2.729	3.3422	3.2484	2.3687	3.5837	2.917	3.3101	2.8641	3.0716	2.6376	2.8358	3.4024	3.4112	3.4819
metab_7187	6-Acetamido-3-oxohexanoate	C8H13NO4	2.8281	-	4.5341	4.5768	4.5367	4.3725	4.2145	4.0797	4.5279	4.3575	4.2148	4.5164	4.3237	4.6448	4.488	4.5479	4.6022	5.4543	4.3798	4.3945
metab_7189	Biotinyl-5'-AMP	C20H28N7O9PS	2.8211	-	5.7941	5.8304	5.7916	5.9165	6.1462	6.1797	5.9417	5.6213	6.0775	5.7565	5.5439	5.7786	5.6268	5.5354	5.424	5.8053	5.8996	5.8907
metab_7192	Threoninyl-Methionine	C9H18N2O4S	2.8211	Carboxylic acids and derivatives	4.0488	4.0589	3.9995	4.5521	3.7759	4.6828	2.9258	2.9611	3.2135	3.8314	3.9114	3.7312	3.7377	3.7221	3.3514	3.7516	3.9148	3.6401
metab_7195	N-Acetyl-D-quinovosamine	C8H15NO5	2.8211	-	5.0917	5.1195	5.109	4.9776	5.0039	4.8362	5.2835	5.151	4.8955	5.2552	4.9932	5.1385	5.1841	5.2946	5.2603	5.2482	4.9411	5.0189
metab_7203	Pro Pro Pro	C15H23N3O4	2.8141	-	5.6066	5.6185	5.6094	5.9145	5.9628	5.8539	5.9025	5.5967	5.6906	5.5657	5.1252	5.5539	5.29	5.4715	5.2489	5.6271	5.5332	5.497
metab_7213	N,N'-Bis(gamma-glutamyl)cystine	C16H26N4O10S2	2.8009	-	4.7607	4.7866	4.7098	4.7978	5.0027	4.7863	4.6737	4.6501	4.715	4.8706	4.2637	5.0599	4.5239	4.5654	4.1726	4.8492	4.8578	4.9414
metab_7216	N-Acetylmannosamine	C8H15NO6	2.8009	Organooxygen compounds	5.3405	5.3515	5.3593	4.8686	4.8627	5.0312	4.8228	4.6209	5.2123	4.9005	5.0961	5.4455	5.7237	5.9459	5.6634	5.1275	5.051	5.0918
metab_7235	DL-Ornithino-L-alanine	C8H17N3O4	2.7842	Carboxylic acids and derivatives	4.011	4.0448	4.0286	3.6815	3.595	3.6547	1.2505	2.5418	3.6674	3.2953	3.4525	3.9616	4.1572	4.6993	4.474	1.9149	3.2899	3.1835
metab_7239	Isokobusone	C14H22O2	2.7772	Organooxygen compounds	5.1159	5.0464	5.0835	5.6348	5.4241	5.3175	5.4841	4.935	5.1488	5.3729	5.1048	4.9215	4.5178	4.7636	4.884	4.1003	4.8291	4.4182
metab_7240	Ile Glu	C11H20N2O5	2.7772	-	5.9091	5.8791	5.903	6.2114	6.1051	6.1274	6.0345	5.9138	5.9718	5.8657	5.7676	5.7881	5.6375	5.7854	5.5318	5.6578	5.6641	5.5782
metab_7242	Thioarginine	C6H13N3O2S	2.7772	-	4.525	4.4897	4.5262	4.3415	4.4661	4.3577	4.5399	4.5873	4.5449	4.5486	4.5271	4.7547	4.4435	4.2503	4.2652	4.4111	4.3669	4.3909
metab_7265	Tyr Gly	C11H14N2O4	2.7296	-	4.8563	4.8411	4.8742	5.1619	5.0969	5.0834	4.9743	4.9079	4.8987	4.7744	4.6803	4.7	4.556	4.7293	4.5912	4.6808	4.7257	4.6223
metab_7314	Tyr Glu	C14H18N2O6	2.6578	-	4.8887	4.8964	4.8672	5.0999	5.0732	5.0106	4.9891	4.9697	4.9243	4.9148	4.8555	4.8339	4.7451	4.8585	4.702	4.7137	4.754	4.7146
metab_7325	(R)-3-hydroxybutyrylcarnitine	C11H21NO5	2.6397	Fatty Acyls	4.3899	4.3971	4.3838	4.5718	4.2496	4.3904	4.4415	4.7288	4.5141	4.257	4.3984	4.3665	4.6112	4.2071	4.4018	3.7933	4.0122	4.2376
metab_7327	4-Oxo-4-(3-pyridyl)-butanamide	C9H10N2O2	2.6336	Organooxygen compounds	4.789	4.7693	4.7563	3.8559	3.8881	3.7987	3.9574	3.9712	4.0197	3.9789	3.9471	4.6481	5.0341	5.5206	5.1897	3.9864	3.9036	3.9779
metab_7331	Proclavaminic acid	C8H14N2O4	2.6239	-	4.4475	4.3992	4.4183	4.5523	4.4219	4.2165	4.9179	4.7979	4.104	4.1951	4.238	4.4674	4.4428	4.3336	4.3331	4.1163	4.1499	3.9735
metab_7347	2-Pyrimidine Acetic Acid	C6H6N2O2	2.5874	-	4.9617	5.1461	4.9981	4.9634	5.0655	4.9723	5.126	5.1736	5.1784	5.1539	5.1312	5.1817	5.1133	5.1686	5.1608	5.2128	5.2068	5.2224
metab_7350	Gamma-Glutamylproline	C10H16N2O5	2.5804	Carboxylic acids and derivatives	4.4714	4.397	4.4249	4.3577	4.3947	4.3789	4.6047	4.5499	4.4794	4.4422	4.3395	4.4018	4.2845	4.3922	4.2227	4.3882	4.3201	4.4641
metab_7365	Kaempferol 3-(2''-rhamnosylrutinoside)	C33H40O19	2.5524	-	5.5298	5.4874	5.4897	5.5482	5.5251	5.7612	5.3995	5.6508	5.3808	5.4436	5.5047	5.3689	5.3543	5.4621	5.4862	5.2452	5.2768	4.994
metab_7367	Thymidine	C10H14N2O5	2.5524	Pyrimidine nucleosides	5.2156	5.1884	5.2076	5.0104	5.0943	4.9542	5.3237	5.3023	5.3632	5.2278	5.1474	5.1863	5.1635	5.118	5.0977	5.338	5.3925	5.0761
metab_7369	7-Methylguanosine	C11H15N5O5	2.5454	Purine nucleosides	5.1049	5.0767	5.1	5.2973	5.2031	5.2489	5.1185	5.1971	5.1621	5.2846	5.2659	5.0757	4.7183	5.0085	5.0251	4.6688	4.974	4.9205
metab_7381	Prolyl-Gamma-glutamate	C10H17N3O4	2.5173	Carboxylic acids and derivatives	6.2415	6.2538	6.2395	6.2808	6.4696	6.3587	6.0136	6.0095	6.1237	6.4663	6.3439	6.1994	5.8918	5.9998	6.1229	5.9169	6.307	6.2918
metab_7396	(+)-threo-2-Amino-3,4-dihydroxybutanoic acid	C4H9NO4	2.4753	Carboxylic acids and derivatives	4.99	5.013	5.0169	4.4362	4.5242	4.3507	4.6398	4.8152	4.9112	4.8237	5.0639	5.2867	5.1712	4.8512	5.1383	5.0888	4.8444	5.1534
metab_7403	CAMP	C10H12N5O6P	2.4193	Purine nucleotides	5.3039	5.3276	5.3278	5.7979	5.6943	5.6494	5.7909	5.3687	5.6123	5.0919	4.9908	4.9217	4.7411	5.0239	5.083	4.7482	4.5235	4.2933
metab_7408	Lys Leu	C12H25N3O3	2.3283	-	5.5688	5.5495	5.5461	5.905	5.8382	5.7775	5.8212	5.7658	5.6532	5.5377	5.4897	5.4638	5.2705	5.4615	5.4973	5.1712	5.361	5.0994
metab_7409	Phenylacetic acid	C8H8O2	2.3283	Benzene and substituted derivatives	4.8704	4.8882	4.8491	5.153	4.9128	5.0582	4.8025	4.8105	4.8638	5.0426	4.8475	4.8032	4.7646	4.8778	4.8109	4.6264	4.7275	4.8117
metab_7411	4-Hydroxybenzaldehyde	C7H6O2	2.3213	Organooxygen compounds	5.3532	5.3638	5.3404	5.6439	5.3972	5.5288	5.2743	5.3029	5.3298	5.4919	5.3532	5.3019	5.2631	5.37	5.3067	5.165	5.25	5.3534
metab_7416	L-Alloisoleucine	C6H13NO2	2.2933	Carboxylic acids and derivatives	7.1847	7.2149	7.1902	7.5189	7.3315	7.4592	7.4457	7.321	7.2811	7.3565	7.1093	7.085	7.0074	7.0223	7.0139	6.7827	6.9998	6.9371
metab_7427	3,4,5-trihydroxy-6-[(3-methylbut-2-enoyl)oxy]oxane-2-carboxylic acid	C11H16O8	2.2443	-	4.8474	4.815	4.8307	3.1141	4.1716	4.0373	4.3658	4.6913	4.551	4.8691	4.8794	4.8568	5.0302	4.8816	4.92	5.0747	5.0203	5.1811
metab_7438	1-Methylguanine	C6H7N5O	2.1113	Imidazopyrimidines	5.0015	5.016	5.0183	5.1667	5.1192	5.0723	5.021	5.0675	5.0423	5.2895	5.1897	5.0959	4.7707	4.9729	4.9132	4.8876	5.0428	4.9459
metab_7442	D-Tagatose	C6H12O6	2.0762	Organooxygen compounds	5.8254	5.8594	5.8397	6.1069	6.0394	6.1901	5.5173	5.8166	5.5344	5.5087	5.6537	5.5547	5.9767	5.9287	5.9304	5.7024	5.7046	5.8446
metab_7443	N-Alpha-acetyllysine	C8H16N2O3	2.0762	Carboxylic acids and derivatives	5.2427	5.2497	5.2559	5.5349	5.4408	5.417	5.3969	5.3441	5.1596	5.1049	5.0262	5.0716	5.0263	5.1481	5.2014	5.1543	5.0289	4.8472
metab_7445	L-2-Amino-4-methylenepentanedioic acid	C6H9NO4	2.0762	Carboxylic acids and derivatives	6.0012	6.0277	6.0045	6.0346	6.0683	6.0026	6.0017	5.925	6.0208	5.989	6.0566	6.0863	6.121	6.015	6.1516	5.9345	5.8172	5.9366
metab_7448	1-Methyladenosine	C11H15N5O4	2.0623	Purine nucleosides	5.5799	5.6117	5.5879	5.7505	5.5903	5.6506	5.8228	5.8513	5.7695	5.4748	5.6981	5.6813	5.3847	5.55	5.4468	5.217	5.4889	5.4997
metab_7468	L-N-Carboxymethylserine	C5H9NO5	1.8942	Carboxylic acids and derivatives	5.4486	5.4445	5.4203	5.7587	5.6611	5.7011	5.4833	5.4079	5.7144	5.3406	5.4743	5.2885	5.3614	5.3643	5.1599	5.4078	5.5463	5.0575
metab_7471	Gamma-D-Glutamylglycine	C7H12N2O5	1.8522	-	7.5277	7.5441	7.5206	7.7302	7.6711	7.6992	7.5235	7.4505	7.7704	7.4362	7.5121	7.3733	7.4985	7.4666	7.2817	7.5587	7.7059	7.3232
metab_7476	Trans-S-(1-Propenyl)-L-cysteine	C6H11NO2S	1.7962	Carboxylic acids and derivatives	5.2167	5.2088	5.2008	6.0347	5.8537	5.7986	4.1288	4.9126	3.3372	3.6402	4.4023	4.3284	4.8878	5.4098	4.8415	5.2141	3.3163	4.7261
metab_7494	N-alpha-Acetyl-L-2,4-diaminobutyrate	C6H12N2O3	1.6561	-	5.8775	5.8811	5.864	6.1433	6.1361	6.0079	5.822	5.8155	5.9826	5.8257	5.9347	5.9118	5.8844	5.8073	5.7546	5.7154	5.8667	5.7438
metab_7514	4-Guanidinobutanoic acid	C5H11N3O2	1.4396	Carboxylic acids and derivatives	4.8902	4.914	4.8659	4.5472	4.5609	4.5157	4.6997	4.5585	4.6365	4.5213	4.5327	4.7344	5.316	5.4599	5.2717	4.8605	4.5766	4.705
metab_7518	Cytidine	C9H13N3O5	1.4257	Pyrimidine nucleosides	5.3819	5.3581	5.372	5.6623	5.6239	5.6097	5.7164	5.6851	5.4858	5.5595	5.3273	5.3104	5.1369	5.3349	5.4964	4.6246	5.2285	4.9363
metab_7548	N-Methyl-a-aminoisobutyric acid	C5H11NO2	1.2725	Carboxylic acids and derivatives	6.6525	6.6838	6.6626	6.8995	6.7777	6.9107	6.9843	6.7014	6.7397	6.8804	6.5573	6.6746	6.4972	6.5534	6.4934	6.5941	6.6466	6.7018
metab_7565	Kaempferol 3-neohesperidoside-7-(2''-p-coumaryllaminaribioside)	C48H56O27	1.1544	-	6.5738	6.5536	6.575	5.2633	5.9518	5.9152	6.3818	6.4695	6.559	6.718	6.2746	6.5316	6.4037	6.4864	6.3227	6.4883	6.6365	6.5529
metab_7573	Ala Glu Pro	C13H21N3O6	1.0506	-	5.5315	5.5925	5.5384	3.9419	5.3771	4.019	3.8829	5.6557	4.8479	5.6468	5.6791	5.2329	5.7246	5.5263	5.3962	5.7051	5.7683	5.7673
metab_7577	Tosyllysine Chloromethyl Ketone	C14H21ClN2O3S	1.0299	-	6.348	6.3655	6.3417	6.53	6.5445	6.5121	6.5572	6.4357	6.4112	6.3344	6.4487	6.3259	6.1507	6.3698	6.374	6.0651	6.1795	6.1902
metab_7595	N-Nitrosoproline	C5H8N2O3	0.9886	Carboxylic acids and derivatives	5.9441	5.9896	5.9455	6.0251	5.9067	6.1	6.1608	6.1432	6.1476	5.9268	5.885	6.0196	5.9408	5.9599	5.8866	6.0445	5.865	5.8984
metab_7605	Chloropanaxydiol	C17H25ClO3	0.9607	Halohydrins	6.3595	6.3568	6.3689	6.5224	6.5216	6.4674	6.5423	6.4541	6.4441	6.2887	6.4407	6.3234	6.2175	6.4086	6.4443	6.1899	6.1928	6.2191
metab_7610	BERGENIN	C14H16O9	0.9403	Benzene and substituted derivatives	5.5287	5.5267	5.5226	5.5123	5.2161	5.4636	5.3043	5.4862	5.3422	5.8014	5.6901	5.8112	5.4979	5.3443	5.031	5.6523	5.6519	5.6738
metab_7693	L-2-Amino-5-(methylthio)pentanoic acid	C6H13NO2S	0.8234	Carboxylic acids and derivatives	5.6303	5.6485	5.6187	5.9909	6.0665	5.9525	6.1209	4.3901	5.1045	5.4268	5.615	4.9012	5.6293	5.3066	5.6816	4.9204	5.293	5.2808
metab_7726	2,5-Diaminohexanoate	C6H14N2O2	0.7955	-	5.0915	5.1518	5.0974	5.428	5.2127	5.4541	4.9363	4.9832	4.9375	5.0842	5.1729	5.088	5.0225	5.0367	4.9182	4.9677	5.0019	5.0336
metab_7861	2-Hydroxycinnamic acid	C9H8O3	2.3283	Cinnamic acids and derivatives	6.5452	6.5674	6.5448	6.8779	6.62	6.7637	6.4671	6.5033	6.5317	6.6987	6.5496	6.5007	6.4405	6.5751	6.4891	6.3146	6.4152	6.5211
metab_7862	7-Methylguanine	C6H7N5O	2.5383	Imidazopyrimidines	5.2045	5.213	5.2213	5.417	5.3114	5.2833	5.1981	5.2221	5.2188	5.4674	5.3826	5.2044	5.0077	5.2051	5.1642	5.0955	5.1481	5.0669
metab_7863	Dodecanoic acid	C12H24O2	6.3886	Fatty Acyls	5.3266	5.3381	5.3107	5.527	5.6322	5.589	5.1877	5.3042	5.2586	5.2393	5.3253	5.2719	5.3562	5.2504	5.1755	5.1162	5.1773	5.1744
metab_7864	Gamma-Terpinene	C10H16	5.9892	Prenol lipids	3.9988	4.0974	3.9799	4.1961	4.0665	4.1996	3.9458	4.0335	3.9835	4.1896	4.1993	4.0685	3.8873	4.0279	3.9466	4.0856	4.0321	3.9558
metab_7865	Gibberellin A37	C20H26O5	6.3188	Prenol lipids	5.2349	5.1684	5.2365	5.4407	5.4558	5.426	5.3259	5.2881	5.4228	5.363	5.011	5.0625	5.2268	5.2091	5.1472	3.7902	4.4943	4.3837
metab_7867	Indole	C8H7N	2.8422	Heteroaromatic compounds	5.0167	5.0701	5.0207	5.2296	5.2185	5.2329	5.1304	5.3656	5.0119	5.063	4.9578	4.9689	4.9281	5.1089	5.0294	4.6601	4.7955	4.6048
metab_7869	Levan	C18H32O16	1.3352	Organooxygen compounds	5.9718	5.957	5.9198	5.0126	5.0562	5.5049	5.3113	5.8321	5.5182	5.7057	5.8831	5.8604	6.2089	6.0977	6.0512	6.3045	6.1457	6.2336
metab_7871	P-Aminobenzoic acid	C7H7NO2	0.9677	Benzene and substituted derivatives	7.7724	7.8009	7.7757	7.8719	7.8662	7.9032	7.6697	7.712	7.8102	7.7792	7.8394	7.8577	7.7708	7.8087	7.7654	7.837	7.8045	7.8915
metab_7878	Mabiogenin 3-[rhamnosyl-(1->6)-glucoside]	C42H68O14	6.2091	Steroids and steroid derivatives	5.6784	5.7236	5.6676	5.7367	5.9354	5.8557	5.5803	5.9334	5.003	5.2483	5.715	5.5074	5.6165	5.6562	5.5549	5.5294	5.3478	5.5361
metab_7886	L-Glutamine	C5H10N2O3	0.9053	Carboxylic acids and derivatives	5.9305	5.9733	5.9679	6.1767	5.9342	6.0186	6.0086	5.9555	6.1417	6.0394	6.1083	6.071	5.9414	5.9167	5.8759	5.7232	5.7255	5.9026
metab_7888	Molybdopterin precursor Z	C10H12N5O7P	2.5162	Pteridines and derivatives	6.4703	6.4234	6.4287	6.8776	6.8238	6.7591	6.8659	6.5772	6.7371	6.2558	6.2507	6.1569	5.9741	6.1953	6.2739	5.8943	5.9069	5.6853
metab_7890	Adenylosuccinate	C14H18N5O11P	2.7563	Purine nucleotides	6.0084	6.0514	6.0598	5.8056	5.9255	5.7618	5.5078	5.5025	5.8084	5.9045	5.7299	6.2592	6.0201	6.0596	5.5932	6.7204	6.2836	6.2622
metab_7902	2-hydroxy-3-phenylpropanal	C9H10O2	4.0032	-	5.3283	5.3877	5.3972	5.3519	5.0411	5.4631	5.5115	5.2863	5.1402	5.182	5.5153	5.4654	5.5392	5.3126	5.4075	4.9813	4.776	5.0219
metab_7910	Uridine	C9H12N2O6	2.1661	Pyrimidine nucleosides	7.0454	7.0809	7.0797	7.32	7.31	7.276	7.2507	7.2221	7.2006	7.1135	7.0596	7.0674	6.9101	7.0376	7.107	6.5242	6.9236	6.8685
metab_7919	4-Heptenoic acid	C7H12O2	6.2831	Fatty Acyls	4.9612	4.9777	4.9945	5.2036	5.2333	5.1752	5.1202	4.9862	5.0488	4.9972	4.8817	4.9489	4.7484	5.0692	4.8118	4.9589	5.0226	4.8514
metab_7924	Gingerglycolipid A	C33H56O14	6.6072	Glycerolipids	6.3152	6.3275	6.3493	6.2852	6.5407	6.5062	6.4029	6.3855	6.4988	6.1586	5.8975	6.2419	6.2174	6.2307	6.2693	5.9868	5.5967	6.1605
metab_7926	13(S)-HpODE	C18H32O4	6.5123	Fatty Acyls	6.8832	6.8727	6.909	7.2459	7.1628	7.2848	6.8924	6.8976	6.9402	7.0038	6.9466	6.8177	6.6645	6.8384	6.792	6.3155	6.5683	6.4955
metab_7934	Vinaginsenoside R2	C43H72O15	6.2629	Prenol lipids	6.301	6.2682	6.2797	6.3915	6.5294	6.4522	6.1334	6.3522	5.8459	6.2459	6.6191	5.9988	6.2017	6.1987	6.3307	6.1137	5.8229	6.1273
metab_7947	3,4,5-trihydroxy-6-({2-[6-(1-hydroxy-2-methylbut-3-en-2-yl)-7-oxo-2H,3H,7H-furo[3,2-g]chromen-2-yl]propan-2-yl}oxy)oxane-2-carboxylic acid	C25H30O11	6.1248	-	7.0463	7.0644	7.0211	6.8409	6.6311	6.9037	7.0749	6.9294	7.067	6.9287	6.7279	6.9551	7.2056	7.349	7.1309	6.7647	6.805	7.199
metab_7960	Glutamylproline	C10H16N2O5	2.8411	Carboxylic acids and derivatives	5.3157	5.317	5.3425	5.4587	5.5147	5.4675	5.5644	5.3912	5.389	5.3956	5.1893	5.4144	5.2579	5.2354	5.097	5.3778	5.4309	5.2695
metab_8021	3-hydroxy-3-methyl-Glutaric acid	C6H10O5	2.5388	Fatty Acyls	6.9504	6.9509	6.9672	7.1432	7.051	7.1031	6.9918	6.9131	7.1426	7.0061	6.9092	7.012	6.8151	6.7312	6.8048	6.8764	6.9136	6.9642
metab_8032	3-Methylglutaric acid	C6H10O4	2.7338	Fatty Acyls	6.506	6.5255	6.5347	6.5615	6.6333	6.5855	6.4124	6.4681	6.3985	6.6476	6.5841	6.6755	6.5104	6.5151	6.4929	6.5569	6.5012	6.4505
metab_8055	L-beta-aspartyl-L-leucine	C10H18N2O5	3.1094	Peptidomimetics	4.8201	4.8154	4.82	4.928	4.9584	4.9785	5.1941	5.0572	4.9336	4.761	4.6553	4.7593	4.6716	4.7933	4.6769	4.6895	4.6339	4.5425
metab_8064	Pisumionoside	C19H32O9	3.2199	Prenol lipids	5.1415	5.1555	5.1465	5.1361	5.1143	5.105	5.1197	5.0552	4.9974	5.0585	5.379	5.2837	5.1368	4.9923	5.1818	4.9134	4.8183	4.5175
metab_8092	2-Isopropylmalic acid	C7H12O5	3.7518	Fatty Acyls	6.1118	6.2391	6.2712	6.0614	6.1256	6.0522	6.3251	6.3049	6.114	5.7424	5.753	6.1196	6.155	6.3351	6.2108	6.4167	6.4944	6.5138
metab_8106	4-Methoxycinnamic acid	C10H10O3	4.0066	Cinnamic acids and derivatives	5.2792	5.358	5.3639	5.3061	4.9424	5.4323	5.4766	5.2273	5.0533	5.1091	5.4876	5.4186	5.4969	5.2765	5.3608	4.837	4.5903	4.9418
metab_8114	1,4-Ipomeadiol	C9H14O3	3.9768	Heteroaromatic compounds	4.904	4.8716	4.8787	5.0251	5.0805	5.0304	4.8089	5.0577	4.7681	4.7511	4.586	4.7288	4.7257	4.7627	4.8637	4.9989	4.9207	4.5266
metab_8122	1,2,10-Trihydroxydihydro-trans-linalyl oxide 7-O-beta-D-glucopyranoside	C16H30O10	4.2962	Organooxygen compounds	5.1779	5.0947	5.0515	5.214	5.1974	5.12	5.2865	5.1323	5.0423	5.0574	5.0097	5.1313	4.7659	4.9093	4.8524	5.337	5.2026	5.0824
metab_8147	Diosmin	C28H32O15	4.838	Flavonoids	6.0192	5.922	5.919	6.0596	5.6728	5.9244	5.9968	6.0288	5.797	5.8347	6.0884	5.8991	5.8351	5.6192	5.9963	5.6928	5.7604	5.6153
metab_8161	Prenyl glucoside	C11H20O6	5.0512	Fatty Acyls	4.7391	4.7056	4.702	4.8354	4.6021	4.7645	4.4268	4.3747	4.6652	4.6531	4.6144	4.6505	4.9172	4.8727	4.9124	4.5782	4.4399	4.5131
metab_8163	2-benzyl-2-hydroxybutanedioic acid	C11H12O5	5.11	-	7.1941	7.2332	7.2602	7.2929	7.1758	7.5342	7.0618	6.6901	6.8199	6.4021	6.6633	7.4841	7.0593	6.6922	6.9699	7.3065	7.1969	7.1729
metab_8164	6''-O-Acetylglycitin	C24H24O11	5.1152	-	6.9017	6.847	6.8461	6.9525	6.6733	6.9852	6.7034	6.5488	6.8042	6.7428	6.8118	6.7631	6.9596	6.8683	7.0128	6.748	6.6626	6.6832
metab_8184	2-Ethyl-2-Hydroxybutyric acid	C6H12O3	5.4822	Fatty Acyls	5.6678	5.7328	5.7734	5.498	5.8891	5.7499	5.9709	5.8794	5.7234	5.8442	5.8526	5.88	5.4681	5.372	5.3921	5.8143	5.6679	5.6149
metab_8197	S-Japonin	C19H28O3S	5.6841	Prenol lipids	4.4936	4.4651	4.4307	5.4526	4.8197	4.8433	4.5094	4.4884	4.5238	4.451	4.1447	3.919	4.239	4.2079	4.4258	3.8418	3.9452	3.7677
metab_8209	(R)-Pelletierine	C8H15NO	5.8778	Piperidines	4.5985	4.6343	4.6738	4.5098	4.0997	4.4278	4.9543	4.4159	4.2617	4.333	4.1528	4.5767	4.8241	4.7632	4.5517	4.3459	4.2686	4.3297
metab_8217	N,N'-diacetylchitobiose	C16H28N2O11	5.9483	-	4.9017	4.952	4.9536	5.0433	5.0257	5.0539	4.8497	4.9911	4.9764	5.0885	4.7629	4.9668	5.3025	4.9262	5.0359	4.589	4.7633	4.3387
metab_8231	2-Phenylethyl hexanoate	C14H20O2	6.0814	Fatty Acyls	4.3255	4.3209	4.4037	3.5543	3.8377	2.6065	4.2879	3.965	4.0766	4.4633	4.7764	4.6878	3.6584	3.3297	3.9748	4.5472	4.439	4.6416
metab_8248	Goyaglycoside h	C42H70O15	6.182	Steroids and steroid derivatives	5.9557	5.9595	5.9677	6.0985	6.2369	5.9924	5.7146	6.0996	5.5056	5.4783	5.9805	5.8524	5.8415	5.8743	5.6979	5.7991	5.8422	5.6586
metab_8263	Cibaric acid	C18H28O5	6.3097	Fatty Acyls	5.5246	5.5161	5.515	5.9269	5.9943	5.9459	5.638	5.6889	5.7027	5.7253	5.3634	5.3894	5.3826	5.4223	5.3856	4.7704	5.1147	4.9627
metab_8284	5'-Carboxy-gamma-chromanol	C18H26O4	6.4584	-	4.8963	4.9366	4.8748	4.9945	5.0172	5.0659	4.8103	5.0075	4.9129	4.8533	4.7938	4.7254	4.7047	4.9738	5.03	4.5903	4.7184	4.5645
metab_8291	Kinetensin 1-3	C15H30N6O4	6.5123	Carboxylic acids and derivatives	5.2578	5.2761	5.368	5.6295	5.5089	5.6166	5.3448	5.3003	5.3984	5.3573	5.2913	5.1583	5.0827	5.2319	5.1788	4.6332	4.8343	4.7743
metab_8293	Hoduloside VI	C41H68O14	6.5123	Prenol lipids	5.5598	5.5477	5.5768	5.5234	6.2756	5.9369	4.9055	5.977	3.5142	5.098	5.4777	4.4185	4.3009	5.1217	5.1857	3.4199	3.4974	4.1133
metab_8301	LysoPC(18:3(6Z,9Z,12Z))	C26H48NO7P	6.6473	Glycerophospholipids	6.9387	6.8959	6.8977	6.8141	6.7497	6.8467	6.9678	6.8492	6.9366	6.7278	6.7048	6.7156	6.8035	6.8822	6.9141	6.8969	6.865	6.6419
metab_8309	LysoPC(18:2(9Z,12Z))	C26H50NO7P	6.7502	Glycerophospholipids	7.2384	7.1853	7.1438	7.0985	7.1002	7.173	7.2188	7.2056	7.2068	7.0038	7.0682	7.0522	7.1015	7.0959	7.1148	6.9441	7.0112	7.0539
metab_8320	LysoPC(18:1(9Z))	C26H52NO7P	6.8894	Glycerophospholipids	6.5963	6.518	6.5148	6.1156	6.0206	6.0886	6.5764	6.4939	6.4264	6.4115	6.539	6.4839	6.5962	6.4485	6.5923	6.5278	6.3478	6.6568
metab_8425	Sphingosine 1-phosphate	C18H38NO5P	6.6808	Sphingolipids	5.0548	5.0947	5.0297	5.2362	5.1172	5.0803	4.9477	4.889	5.0369	5.0986	5.7176	5.3674	5.7269	4.9184	5.0741	5.4487	5.9594	6.0914
metab_8428	PE(18:3/0:0)	C23H42NO7P	6.6473	-	7.0607	7.0096	7.0115	6.9673	6.8631	6.9671	6.9995	6.8858	6.9905	6.7982	6.8471	6.8063	6.9805	7.0425	7.0394	7.066	7.0042	6.8167
metab_8429	13(S)-HODE	C18H32O3	6.6473	-	6.5357	6.4853	6.4627	6.8546	6.7495	6.8753	6.4789	6.5307	6.3978	6.5209	6.6163	6.3159	6.3134	6.4065	6.3964	5.8985	6.2693	6.0566
metab_8434	13(S)-HOTrE	C18H30O3	6.5928	-	6.3722	6.3658	6.3797	6.7349	6.6132	6.7084	6.3856	6.4	6.3714	6.4727	6.379	6.1594	6.2237	6.3131	6.3179	5.7058	6.1637	5.7877
metab_8454	Xi-3-Methyl-3-cyclohexen-1-ol	C7H12O	6.4584	Organooxygen compounds	4.7166	4.7593	4.7323	4.7808	4.8594	4.7816	4.5776	4.5431	4.7357	5.0162	4.7683	4.8382	4.6831	4.8029	4.7512	4.4922	4.7249	4.6944
metab_8459	Thromboxane B2	C20H34O6	6.4232	Fatty Acyls	5.234	5.2941	5.3527	5.4249	5.877	5.5454	5.1094	5.6238	5.0659	4.9132	5.1293	5.0116	4.8678	5.1384	4.9095	4.8543	4.9338	4.8827
metab_8461	2-Carboxy-4-dodecanolide	C13H22O4	6.4232	Lactones	5.1636	5.1795	5.1968	5.2122	5.0199	5.0234	5.0402	4.9441	5.0616	5.2141	5.2422	5.2251	5.2677	5.2221	5.2334	5.2746	5.3427	5.2015
metab_8468	Traumatic Acid	C12H20O4	6.3629	Fatty Acyls	6.2	6.2626	6.2637	6.5194	6.5111	6.4659	6.4453	6.2803	6.3732	6.3117	6.3025	6.2467	5.9213	6.2381	6.1682	5.9036	6.2237	5.9296
metab_8473	PG(18:1(11Z)/22:6(4Z,7Z,10Z,13Z,16Z,19Z))	C46H77O10P	6.3348	Glycerophospholipids	6.1897	6.2537	6.2549	6.245	6.4695	6.6468	6.2632	6.4176	5.5706	5.8837	6.3792	5.9537	6.2135	6.062	6.3108	6.1117	5.8064	5.8916
metab_8492	Pitheduloside B	C46H74O16	6.25	Prenol lipids	6.8859	6.8869	6.8601	7.0482	7.1536	7.0854	6.7427	7.0249	6.1884	6.5534	6.9059	6.5974	6.8028	6.7903	6.9411	6.7383	6.7045	6.6979
metab_8501	PC-M5'	C29H37NO5	6.216	-	5.9842	6.0003	5.9933	6.218	6.1888	6.1182	6.3123	6.2253	6.2411	6.1033	5.7605	6.0243	5.7779	5.8636	6.0736	5.8005	6.0553	6.0365
metab_8509	Notoginsenoside T1	C36H60O10	6.182	Prenol lipids	5.9872	5.9858	6.0147	6.0758	6.5446	6.2935	5.5767	6.3271	5.0876	5.2637	6.1238	5.5651	5.2028	5.901	5.7075	3.1923	4.5012	5.3095
metab_8519	6-[(E)-2-(2H-1,3-benzodioxol-5-yl)ethenyl]-5-hydroxy-4-methoxy-5,6-dihydro-2H-pyran-2-one	C15H14O6	6.1248	-	4.8008	4.9063	4.8701	4.6591	4.351	4.6717	4.8364	4.822	4.9585	4.6979	4.576	4.7491	5.0801	5.2387	5.0228	4.4138	4.6233	5.0537
metab_8531	(R)-2-Hydroxycaprylic acid	C8H16O3	6.0092	Fatty Acyls	3.9634	3.9722	4.0762	4.1551	3.8277	4.3436	3.8081	3.517	3.2372	2.7509	2.4661	3.4263	3.5172	2.9324	4.0608	3.3382	3.2405	3.7741
metab_8552	N-Acetyl-D-phenylalanine	C11H13NO3	4.5993	-	6.9741	6.9976	7.0167	7.1581	7.0034	6.9864	7.0381	7.0693	6.7549	6.9272	6.9826	7.1442	7.0495	7.0447	6.9579	6.7596	6.8235	6.5681
metab_8565	2-[2-hydroxy-3-(3-hydroxyphenyl)propyl]benzene-1,3,5-triol	C15H16O5	3.3928	-	5.2958	5.3101	5.3473	4.997	4.9329	5.3934	5.3837	4.9807	5.0001	5.0568	5.2563	5.2356	5.6813	5.4114	5.7527	4.8312	4.5154	5.2485
metab_8573	3,4,5-trihydroxy-6-[(3-phenyloxiran-2-yl)methoxy]oxane-2-carboxylic acid	C15H18O8	3.2675	-	4.6777	4.6898	4.6808	5.1638	4.8376	4.8888	4.2867	4.7685	4.5662	4.4405	4.2855	4.0615	4.6397	5.0236	4.341	4.5982	4.4344	4.3598
metab_8582	(2S,2'S)-Pyrosaccharopine	C11H18N2O5	2.8411	-	4.3029	4.2936	4.3445	4.3568	3.8259	4.2488	3.5429	0.051	0.0514	0.048	0.0491	4.3037	4.6512	5.2625	4.6827	0.0418	0.0418	0.0377
metab_8605	Bis-gamma-glutamylcysteinylbis-beta-alanine	C22H36N6O12S2	2.7702	Peptidomimetics	5.6782	5.6741	5.6695	6.756	5.5048	5.8395	5.7355	5.5466	5.1067	5.8146	4.9688	5.8506	5.0878	5.1882	5.1302	4.6327	4.9926	4.8699
metab_8607	Guanosine	C10H13N5O5	2.7206	Purine nucleosides	6.0093	5.9735	5.9599	6.231	5.9196	6.1979	6.1384	6.1322	6.0548	5.9917	6.0958	5.9068	5.7528	5.9339	5.9052	5.3563	5.6456	5.8244
metab_8634	D-Myoinositol 4-phosphate	C6H13O9P	0.9327	Organooxygen compounds	6.3177	6.3433	6.3362	6.145	6.2367	6.1364	6.2593	6.2613	6.2966	6.1698	6.3079	6.2861	6.2625	6.3936	6.2975	6.6911	6.4627	6.4882
metab_8673	5'-CMP	C9H14N3O8P	1.4318	-	5.2038	5.264	5.311	5.7772	5.5456	5.624	5.3979	5.2714	5.5411	5.2585	5.3669	5.3025	5.2157	5.1367	4.9869	5.523	4.7857	4.6844
metab_8676	2,5-Furandicarboxylic acid	C6H4O5	1.6429	Furans	5.7216	5.7554	5.7585	5.8875	5.8669	5.8051	5.9149	5.7342	5.8736	5.8557	5.5498	5.7255	5.6183	5.6698	5.5827	5.5669	5.746	5.6646
metab_8892	Carnosine	C9H14N4O3	0.9396	Peptidomimetics	5.0111	5.1902	5.0984	5.0524	4.8918	5.1524	4.7504	5.1662	4.8085	5.4337	5.2385	5.5422	4.8586	4.7375	4.4394	5.0645	5.1722	5.1921
metab_8902	D-Glucarate	C6H10O8	0.9533	Organooxygen compounds	5.3294	5.3653	5.3593	5.3747	5.4778	5.5182	5.3705	5.3374	5.5031	5.3262	5.444	5.324	5.4009	5.4455	5.4857	5.2471	5.1881	5.1468
metab_8916	Leukotriene D5	C25H38N2O6S	0.9738	Fatty Acyls	5.1712	5.2131	5.1572	5.4497	5.1581	5.0999	5.5709	5.4218	5.2658	5.3021	5.0531	5.376	4.9553	4.4861	4.3614	5.1699	5.2063	4.7705
metab_8927	Mannan	C24H42O21	0.9875	Organooxygen compounds	6.0197	6.0051	6.003	5.2038	5.1331	5.4143	4.8662	4.8721	4.8761	5.0724	5.6336	5.7728	6.3197	6.1169	6.331	6.5843	6.2703	6.2757
metab_8936	Galactotriose	C18H32O16	1.0081	Organooxygen compounds	6.3955	6.3803	6.3696	6.0327	5.9271	6.1737	5.9608	6.2029	6.0331	6.0709	6.3059	6.3074	6.5916	6.5043	6.4662	6.7257	6.573	6.6027
metab_8939	3-methoxy-3-oxopropanoic acid	C4H6O4	1.0218	-	5.6287	5.6701	5.6855	5.6578	5.6499	5.8256	5.7677	5.8565	5.6316	5.6631	5.6875	5.5859	5.7147	5.7221	5.8463	5.2604	5.3355	5.3297
metab_8946	L-Fucose	C6H12O5	1.0491	Organooxygen compounds	5.4648	5.4753	5.4989	4.4217	4.6055	5.42	3.2201	5.698	2.7264	2.724	5.2006	2.5324	5.742	6.2702	6.0412	4.0804	4.6665	5.8833
metab_8983	6-methoxy-3-(4-methoxyphenyl)-3,4-dihydro-2H-1-benzopyran-4,7,8-triol	C17H18O6	1.3222	-	5.3298	5.3659	5.3111	4.7053	3.7135	4.8029	4.6635	4.7449	4.6436	4.6536	5.2194	5.3191	4.9259	5.3231	5.4003	6.0106	5.6792	5.5406
metab_8992	Benazeprilat	C22H24N2O5	1.3976	Carboxylic acids and derivatives	6.0993	6.0742	6.0811	4.5697	4.2358	4.6209	5.1088	5.725	5.2515	5.3784	6.0665	5.3437	6.0709	5.6614	5.9421	5.9037	5.5259	6.1995
metab_8994	ADP	C10H15N5O10P2	1.4113	Purine nucleotides	4.8397	4.7178	4.8235	4.1392	4.5489	3.9033	3.8052	3.4548	3.4588	4.0046	4.6313	5.0027	4.7353	5.3659	3.8199	5.9266	4.8811	5.2677
metab_9022	Uridine monophosphate (UMP)	C9H13N2O9P	1.6912	-	6.0353	6.0385	6.0858	6.4485	6.2983	6.326	6.205	6.053	6.1327	6.1192	6.1341	6.0129	5.6822	5.9014	5.8854	5.6237	5.8704	5.6837
metab_9023	Daucic acid	C7H8O7	1.6965	Hydroxy acids and derivatives	5.5078	5.5239	5.5712	5.155	5.56	5.6265	5.6648	5.9329	5.5427	5.4907	5.3712	5.2745	5.5457	5.5993	5.8848	5.1581	5.3648	5.3153
metab_9033	Gamma-delta-Dioxovaleric acid	C5H6O4	1.8171	Keto acids and derivatives	6.9914	7.0248	7.0505	7.2341	7.1461	7.0968	7.2431	7.0525	7.1854	7.1019	6.8634	6.9947	6.7792	6.9419	6.8761	6.8646	7.0372	6.8824
metab_9044	4-Hydroxy-2-oxoglutaric acid	C5H6O6	1.914	Keto acids and derivatives	5.0013	5.0497	5.042	4.7136	4.8965	4.914	4.9256	5.1843	5.0289	5.0881	5.112	5.0789	4.9774	5.0163	5.1116	5.0749	5.0905	5.1588
metab_9076	Lipoamide	C8H15NOS2	2.1576	Dithiolanes	5.3008	5.3391	5.3448	5.3543	5.3801	5.3446	5.25	5.2993	5.3166	5.2611	5.4508	5.3664	5.5094	5.3956	5.5679	5.2938	5.1184	5.2583
metab_9096	Dimethadione	C5H7NO3	2.3	Azolidines	5.0839	5.1043	5.1358	5.3407	5.3162	5.306	5.2804	5.2253	5.2398	5.1602	5.1017	5.0989	4.9271	5.0859	5.1323	4.6938	4.9864	4.9495
metab_9099	Tetrahydrodipicolinate	C7H9NO4	2.3199	Carboxylic acids and derivatives	4.7615	4.7768	4.8435	5.0041	4.9753	4.9841	5.002	4.8768	4.9288	4.8514	4.8018	4.7938	4.6268	4.7704	4.7987	4.5563	4.6855	4.6737
metab_9106	Guanidylic acid (guanosine monophosphate)	C10H14N5O8P	2.4008	-	6.2181	6.2404	6.2356	6.6671	6.599	6.526	6.485	6.3219	6.4779	6.2209	6.104	6.1589	5.8544	5.9673	6.072	5.745	5.9625	5.8003
metab_9111	Leucyl-Aspartate	C10H18N2O5	2.4821	Carboxylic acids and derivatives	5.2133	5.2048	5.2075	5.6279	5.4383	5.5344	5.3319	5.261	5.2975	5.1676	5.1501	5.1112	4.9538	5.1084	4.8877	4.9932	5.0109	4.8701
metab_9126	1,2-Disinapoylgentiobiose	C34H42O19	2.5573	Cinnamic acids and derivatives	5.528	5.5099	5.4741	5.5418	5.6157	5.7964	5.5601	5.6324	5.3314	5.3604	5.8182	5.3813	5.3279	5.3486	5.5159	5.2413	5.3158	5.0577
metab_9128	Xanthopterin	C6H5N5O2	2.5658	Pteridines and derivatives	4.6988	4.7306	4.7378	4.7077	4.7973	4.849	4.5532	4.4888	4.5588	4.6292	4.6926	4.8007	4.723	4.6874	4.663	4.7843	4.6772	4.8124
metab_9135	Mevalonic acid	C6H12O4	2.5903	Fatty Acyls	5.3737	5.3917	5.3868	5.5117	5.3731	5.3902	5.1382	5.2871	5.1329	5.2945	5.3637	5.3948	5.4672	5.5047	5.453	5.5497	5.4721	5.3346
metab_9141	L-alpha-glutamyl-L-hydroxyproline	C10H16N2O6	2.6189	Carboxylic acids and derivatives	4.713	4.7211	4.7266	4.888	4.7166	4.8637	4.6684	4.6051	4.598	4.8513	4.8007	4.5889	4.828	4.6423	4.6892	4.6832	4.8281	4.6195
metab_9159	Etodolac acyl glucuronide	C23H29NO9	2.669	Organooxygen compounds	4.8803	4.8622	4.8688	4.2789	4.682	4.405	5.0699	5.0316	5.014	5.0028	4.8231	4.8309	4.8674	4.7572	4.8322	5.0495	4.975	4.7652
metab_9195	Prolyl-Cysteine	C8H14N2O3S	2.7425	Carboxylic acids and derivatives	5.2337	5.2469	5.25	5.9702	4.9616	5.5403	4.6817	4.5932	4.7472	5.0367	5.235	5.3029	5.0982	5.1924	4.8318	4.8827	4.9782	5.0586
metab_9199	N-Acetylgalactosamine	C8H15NO6	2.7521	Organooxygen compounds	4.6858	4.6894	4.7119	4.5713	4.7702	4.7265	4.8209	4.7905	4.7825	4.7837	4.8844	4.8526	4.6557	4.576	4.6619	4.7947	4.6146	4.7174
metab_9228	Desloratadine	C19H19ClN2	2.8041	Benzocycloheptapyridines	4.4999	4.5484	4.5424	4.8133	4.9643	4.7836	4.3208	4.4406	4.3138	4.3158	4.4051	4.5818	4.9136	4.2452	4.5078	4.2335	4.2801	4.3105
metab_9229	4-Hydroxyphenytoin glucuronide	C21H20N2O9	2.8041	Azolidines	4.9075	4.9332	4.8982	5.0292	5.2645	5.0227	4.9057	4.9728	4.8988	5.0641	4.4866	5.2257	4.8262	4.7	4.4088	5.06	5.0816	5.0311
metab_9240	Meta-O-Dealkylated flecainide	C15H19F3N2O3	2.8152	Benzene and substituted derivatives	4.6915	4.7271	4.7549	4.5601	4.6689	4.4534	5.1036	5.0699	4.7852	4.5594	4.9327	4.6911	4.743	4.7193	4.9678	4.8435	4.6307	4.5616
metab_9242	5-Aminolevulinic acid	C5H9NO3	2.8212	Carboxylic acids and derivatives	3.8723	3.946	3.9545	3.6831	4.3455	3.7739	4.0627	4.1626	4.0028	3.9641	4.2074	4.3371	3.6405	3.4985	3.6067	3.721	3.5298	3.9432
metab_9277	Normetanephrine	C9H13NO3	2.848	Phenols	5.7076	5.7227	5.7257	5.9502	5.9456	5.9695	5.919	6.1067	5.7318	5.7543	5.6488	5.6589	5.5969	5.8275	5.7026	5.302	5.4501	5.2342
metab_9288	3-Methoxytyrosine	C10H13NO4	2.8549	Carboxylic acids and derivatives	4.255	4.1584	4.2288	4.2679	4.3175	4.3269	4.402	4.527	4.2602	4.2236	4.1504	4.1386	3.9901	4.3128	4.1717	3.7838	3.9039	3.577
metab_9292	Monomethyl glutaric acid	C6H10O4	2.8618	Fatty Acyls	6.7083	6.812	6.8057	6.7426	6.7727	6.8004	6.9468	6.9734	6.765	6.8397	6.8189	6.6944	7.0049	6.8576	6.844	6.3003	6.3794	6.6955
metab_9293	Serylproline	C8H14N2O4	2.8618	Carboxylic acids and derivatives	3.8443	3.9789	3.8182	4.2921	3.9714	4.1895	4.0545	3.7427	4.6011	3.8608	4.0614	3.862	3.5321	3.067	3.7385	3.6985	3.7042	2.8027
metab_9299	1,7-Dimethylguanosine	C12H17N5O5	2.8767	Purine nucleosides	4.5356	4.5581	4.5403	4.7567	4.674	4.7311	4.5295	4.4333	4.5903	4.6837	4.7288	4.5883	4.2286	4.5073	4.4265	4.3024	4.4204	4.5788
metab_9343	Domesticoside	C15H20O9	2.9707	Organooxygen compounds	4.0073	4.0259	4.1231	4.1733	3.6629	4.281	2.6608	2.6667	3.5026	5.2045	2.9646	3.1766	3.97	3.1436	4.2735	2.5766	3.0179	3.635
metab_9355	PISCIDIC ACID	C11H12O7	2.9924	Phenylpropanoic acids	6.0944	6.1995	6.1936	6.2141	5.5156	6.2242	6.5192	6.235	5.898	5.9668	6.5152	6.3167	6.3227	6.2467	6.2519	5.4189	5.3066	5.8911
metab_9363	2,4,6-Trihydroxybenzoic acid	C7H6O5	3.0093	Benzene and substituted derivatives	4.1409	4.2685	4.2834	4.334	4.1711	4.2478	4.1425	4.3216	4.8217	4.3379	4.3591	4.28	4.1434	4.1817	4.1629	4.1283	4.1779	4.1864
metab_9384	Tryptophyl-Aspartate	C15H17N3O5	3.0375	Carboxylic acids and derivatives	4.5357	4.6307	4.6233	4.9434	4.7692	4.9046	4.701	4.5167	4.6537	4.6571	4.6805	4.5528	4.4116	4.5309	4.4281	4.3718	4.5613	4.3887
metab_9434	3'-Glucosyl-2',4',6'-trihydroxyacetophenone	C14H18O9	3.1312	-	4.636	4.6803	4.647	4.1763	4.6289	5.2168	3.8744	3.352	3.6875	5.6919	5.0384	4.235	3.7547	3.9231	5.1079	3.7164	4.2161	4.3032
metab_9436	Ethyl 2-furanacrylate	C9H10O3	3.1394	Fatty Acyls	4.5261	4.6032	4.644	4.6759	4.601	4.7816	4.4762	4.549	4.6764	4.6696	4.6541	4.6461	4.6693	4.688	4.7966	4.4991	4.4779	4.4688
metab_9450	3,5-dimethoxybenzene-1,2-diol	C8H10O4	3.1793	-	4.1337	4.186	4.1858	4.2663	4.2897	4.49	4.2793	4.1844	4.27	4.3112	4.255	4.2444	3.9867	4.0194	4.1596	4.2339	4.1032	3.9202
metab_9466	N-Acetyl-6-O-L-fucosyl-D-glucosamine	C14H25NO10	3.2027	Fatty Acyls	4.3655	4.3621	4.3539	4.2525	4.653	2.1299	2.8016	3.2051	2.2949	2.551	5.1102	4.4016	5.0192	5.0585	3.7339	4.7624	2.4685	1.9407
metab_9476	Isovaleric acid	C5H10O2	3.2199	Fatty Acyls	4.2624	4.3405	4.3345	4.8345	4.5493	4.6703	4.2154	4.2403	4.3787	4.3138	4.2106	4.0136	3.8737	4.1757	4.2219	4.2399	3.9671	4.0415
metab_9500	Glutamylmethionine	C10H18N2O5S	3.258	Carboxylic acids and derivatives	4.3706	4.4356	4.452	4.7841	4.5885	4.6365	4.4718	4.4315	4.346	4.6425	4.5498	4.4135	4.1175	4.2578	4.0989	4.0538	4.3448	4.0082
metab_9524	ALANYL-dl-PHENYLALANINE	C12H16N2O3	3.2998	-	4.4284	4.462	4.5145	5.0522	4.815	4.8183	4.8345	4.7334	4.7282	4.3082	4.1851	4.2281	4.1051	4.3306	4.0451	4.1096	3.9155	3.7759
metab_9553	3,4,5-trihydroxy-6-[(2-methylpropanoyl)oxy]oxane-2-carboxylic acid	C10H16O8	3.3404	-	5.0028	5.0035	5.0294	5.2095	5.1286	5.3054	4.5815	4.8105	4.9891	5.1858	4.9611	5.1036	4.9461	4.9231	5.0606	4.9995	4.8622	4.2165
metab_9586	3-Hydroxymelatonin	C13H18N2O3	3.41	Indoles and derivatives	3.3742	3.3816	3.4472	2.751	2.817	2.5686	2.2074	2.9119	2.8314	2.3188	2.5595	2.1867	4.7595	3.17	2.2862	2.1218	2.1218	2.0749
metab_9594	Valyl-Isoleucine	C11H22N2O3	3.4367	Carboxylic acids and derivatives	4.9162	4.9045	4.9698	5.4674	5.2528	5.2205	5.2658	5.1439	5.124	4.8105	4.6471	4.7002	4.4845	4.6066	4.3539	4.4817	4.4614	4.2796
metab_9655	Flavine mononucleotide (FMN)	C17H21N4O9P	3.5783	-	4.7777	4.6997	4.6474	5.1373	5.1142	5.1299	5.0953	5.0434	5.0229	4.9737	5.0335	5.014	4.8879	4.5381	4.632	4.7565	4.74	4.5304
metab_9661	2',4',6'-Trihydroxyacetophenone	C8H8O4	3.6037	-	4.5553	4.5561	4.593	4.4667	4.3799	4.3106	4.3599	4.3879	4.6941	4.5336	4.7317	4.5299	4.494	4.326	4.535	4.8394	4.6226	4.9946
metab_9671	Isolindleyin	C23H26O11	3.6305	Organooxygen compounds	5.5417	5.4917	5.4627	5.2606	5.1028	5.6665	5.447	5.4866	5.4209	5.0967	5.1028	5.3356	5.7081	5.6966	5.4908	5.0921	5.2334	5.4667
metab_9672	Seryltryptophan	C14H17N3O4	3.6339	Carboxylic acids and derivatives	4.7155	4.6827	4.6539	4.9225	4.8692	4.8512	4.7553	4.7111	4.7098	4.7447	4.7436	4.6554	4.5219	4.5319	4.5541	4.4284	4.6141	4.4424
metab_9676	2-METHOXYRESORCINOL	C7H8O3	3.6457	Phenols	3.9162	3.944	3.9695	3.8106	3.6039	3.8069	3.7146	4.0464	3.7526	4.0503	3.9559	3.6869	4.0904	4.0262	3.8794	3.6732	3.6466	3.8562
metab_9692	Tyrosyl-Hydroxyproline	C14H18N2O5	3.7034	Carboxylic acids and derivatives	5.3073	5.252	5.2668	5.3749	5.1418	5.391	5.1802	5.4074	5.0411	5.2839	5.3664	5.2261	5.3807	5.4921	5.0577	4.7624	5.0018	4.8773
metab_9705	10-Acetoxyoleuropein	C27H34O15	3.7275	Tropones	5.3518	5.2703	5.2795	5.2634	5.3032	5.4422	5.1488	5.05	4.9068	5.1866	5.2877	4.9746	5.4468	5.4411	5.5287	4.9456	4.9159	4.8109
metab_9711	Nigellic acid	C15H20O5	3.7518	Prenol lipids	5.0564	5.0268	5.0323	5.1439	5.3239	5.3744	5.0822	4.959	5.3872	4.8995	5.3384	4.8328	4.687	4.9433	4.9788	4.7672	4.4572	4.5631
metab_9777	N1-(2-Hydroxyethyl)flurazepam	C18H16ClFN2O2	3.888	Benzodiazepines	4.5308	4.6111	4.6064	4.691	4.7253	3.8763	4.4586	3.5909	4.3467	4.1341	4.6167	4.2705	4.0111	4.2348	4.3666	3.8346	3.7433	3.9116
metab_9780	Norfentanyl	C14H20N2O	3.8915	Benzene and substituted derivatives	4.0139	3.9736	3.9722	4.5575	4.5194	4.4089	4.0446	4.3109	4.3285	3.9031	3.6561	3.4657	3.1568	3.925	3.9765	2.2088	2.7102	2.9018
metab_9796	(1S,2S,4R,8S)-p-Menthane-1,2,8,9-tetrol 2-glucoside	C16H30O9	3.9257	Prenol lipids	5.0781	5.0819	5.111	5.3176	5.1583	5.4058	5.087	5.0865	5.0848	4.9648	5.6271	4.869	4.8765	4.9173	5.1444	4.8451	4.7595	4.7114
metab_9803	5''-(4-Hydroxy-(E)-cinnamoyl) alpha-L-arabinofuranosyl-(1->3)-beta-D-xylopyranosyl-(1->4)-D-xylopyranoside	C24H32O15	3.9342	-	5.656	5.5641	5.5695	5.5212	5.5664	5.7078	5.817	5.6569	5.8481	5.6382	5.5074	5.4774	5.4433	5.4861	5.5425	5.5641	5.4819	5.5291
metab_9832	(+/-)-Camphoric acid	C10H16O4	4.051	Carboxylic acids and derivatives	4.523	4.4564	4.4803	4.5525	4.6143	4.649	4.4424	4.6777	4.2848	4.1937	4.332	4.5056	4.2636	4.2958	4.4048	4.642	4.3676	4.2455
metab_9848	6''-Malonylapiin	C29H30O17	4.0832	-	5.0525	4.875	4.828	4.695	4.6525	4.6515	4.7527	5.5267	3.9792	4.419	4.9501	4.6352	5.0921	4.8053	4.9785	4.1161	4.3664	4.4617
metab_9871	Isoleucyl-Isoleucine	C12H24N2O3	4.1299	Carboxylic acids and derivatives	4.4176	4.4243	4.4236	4.8672	4.8141	4.7144	4.697	4.708	4.588	4.2425	4.2825	4.1407	3.9344	4.034	3.8837	3.8952	3.921	3.7158
metab_9875	3-{[3,4-dihydroxy-5-(hydroxymethyl)oxolan-2-yl]oxy}-5,7-dihydroxy-2-(4-hydroxy-3-methoxyphenyl)-3,4-dihydro-2H-1-benzopyran-4-one	C21H22O11	4.1478	-	6.2659	6.2163	6.1948	6.1839	6.14	6.0799	6.089	6.1007	5.885	6.0216	5.9632	6.0732	6.3937	6.2233	6.4519	5.6073	5.79	5.997
metab_9879	Tryptophyl-Threonine	C15H19N3O4	4.1597	Carboxylic acids and derivatives	4.7463	4.8168	4.8136	5.0711	4.7238	4.9309	4.6679	4.707	4.8029	4.8834	4.8967	4.8667	4.8136	4.7115	4.7332	4.6788	4.6003	4.548
metab_9881	5,7-dihydroxy-2-(4-hydroxyphenyl)-3-[(3,4,5-trihydroxy-6-{[(3,4,5-trihydroxy-6-methyloxan-2-yl)oxy]methyl}oxan-2-yl)oxy]-1lambda?-chromen-1-ylium	C27H31O14+	4.1597	-	5.8213	5.9224	5.9022	5.7158	5.7866	5.6616	5.7579	5.6353	5.9186	5.9528	5.9758	6.0637	5.989	5.7062	5.8906	5.7102	5.7526	5.6872
metab_9924	9,13-Dihydroxy-4-megastigmen-3-one 9-glucoside	C19H32O8	4.262	Fatty Acyls	5.2535	5.1736	5.1661	4.9825	5.1285	5.3267	5.3385	5.4272	5.1586	5.074	5.3981	5.0275	5.224	4.8445	4.8959	4.8917	5.0902	5.0011
metab_9927	5-Phenyl-1,3-oxazinane-2,4-dione	C10H9NO3	4.2659	Benzene and substituted derivatives	6.5525	6.4722	6.487	6.6693	6.7456	4.9397	5.3231	4.8093	5.0838	5.8973	6.9521	6.5434	7.0454	7.0064	6.1252	6.9559	4.7199	4.6766
metab_9936	3-Hydroxy-2-methylglutarate	C7H12O5	4.2811	Fatty Acyls	4.8772	4.9512	4.9592	4.9212	4.9445	4.835	5.0602	5.0704	5.0013	4.717	4.6556	4.845	4.8467	5.0079	4.9602	5.1179	5.0493	5.0615
metab_9937	Glutamylisoleucine	C11H20N2O5	4.2847	Carboxylic acids and derivatives	5.0044	4.9637	4.952	5.2608	5.1159	5.1619	4.9672	4.9332	4.9214	5.1655	5.036	4.9056	4.7981	4.7172	4.7584	4.5669	4.8166	4.6706
metab_9973	3-HYDROXYCOUMARIN	C9H6O3	4.3845	Coumarins and derivatives	5.0316	5.0638	5.0952	5.2395	4.4518	4.4733	4.5686	4.5433	4.7084	4.9032	4.9608	4.6979	5.5282	5.4366	5.788	4.898	4.8733	4.3908
metab_9985	Trans-o-Coumaric acid 2-glucoside	C15H18O8	4.412	Organooxygen compounds	4.2804	4.3291	4.346	4.9792	4.5863	3.0687	4.5207	4.4432	4.757	4.6231	3.4918	3.466	4.3772	2.4936	4.0308	4.3099	4.1085	4.11
metab_9999	Cis-4-Hydroxycyclohexylacetic acid	C8H14O3	4.4588	Organooxygen compounds	4.1366	4.27	4.2955	4.6884	4.4893	4.6354	4.3364	4.3312	4.198	4.328	4.0081	4.0669	4.1319	4.1873	4.3107	3.9115	3.9279	3.9241
metab_10048	2-Pyridylacetic acid	C7H7NO2	4.5703	Pyridines and derivatives	5.3452	5.4292	5.4403	5.5022	5.4185	5.6369	5.2422	5.2582	5.6255	5.3166	5.5171	5.4567	5.6159	5.3251	5.1868	5.0879	5.1583	5.2928
metab_10052	Suberylglycine	C10H17NO5	4.5785	Carboxylic acids and derivatives	4.5185	4.5538	4.5248	4.6871	4.6886	4.6112	4.4338	4.3991	4.3488	4.2801	4.3178	4.2758	4.6663	4.488	4.7219	4.0805	4.2463	4.2618
metab_10058	3-Deoxy-D-glycero-D-galacto-2-nonulosonic acid	C9H16O9	4.5993	Organooxygen compounds	4.6521	4.6866	4.6992	4.697	4.1572	4.3981	3.3274	3.7483	4.3785	5.1435	4.8275	4.657	4.7323	5.1076	5.1362	4.2181	4.5502	3.9404
metab_10070	3,4,5-trihydroxy-6-{2-[(3-methylbut-2-enoyl)oxy]-2-{9-[(3-methylbut-2-enoyl)oxy]-2-oxo-2H,8H,9H-furo[2,3-h]chromen-8-yl}propoxy}oxane-2-carboxylic acid	C30H34O14	4.6329	-	5.0697	4.9913	4.9542	5.4009	5.4439	5.3608	4.2673	4.3253	5.1293	4.339	4.3091	4.849	4.3244	5.2567	4.3898	4.944	4.8826	4.5324
metab_10081	FISETINIDOL	C15H14O5	4.654	-	4.6256	4.5967	4.626	4.7952	4.2459	4.6356	4.5222	4.4343	4.3069	4.6348	4.4286	4.4374	5.0852	4.6952	4.6674	4.0714	4.2394	3.8786
metab_10114	4-Hydroxystachydrine	C7H13NO3	4.7668	Carboxylic acids and derivatives	4.4844	4.432	4.4506	3.9097	3.8844	4.5487	4.8621	3.7691	3.5246	3.844	3.0629	4.2338	4.8778	4.5041	4.1552	3.3037	3.3585	3.4905
metab_10115	3-(3,4-Dihydroxyphenyl)lactic acid	C9H10O5	4.7707	Phenylpropanoic acids	4.7832	4.7687	4.7783	4.3802	4.3304	4.8503	5.1736	4.2793	4.1071	4.3005	4.077	4.6057	5.1628	4.8454	4.5228	4.1357	4.1052	4.139
metab_10137	Sterebin D	C18H30O3	4.8308	Prenol lipids	3.4274	3.4356	3.3924	1.7134	0.8457	1.1234	0.0059	0.3554	3.6705	0.7321	0.6033	0.0056	0.0056	0.0055	0.0055	0.0048	0.0048	0.0043
metab_10142	Estrone glucuronide	C24H30O8	4.8433	Steroids and steroid derivatives	5.5667	5.48	5.4563	5.2752	4.9942	5.188	5.2172	5.3018	5.381	5.4242	5.5971	5.5547	5.4861	5.3858	5.5975	5.4337	5.2636	5.3233
metab_10163	2-(1,2-dihydroxypropan-2-yl)-9-hydroxy-2H,3H,7H-furo[3,2-g]chromen-7-one	C14H14O6	4.8924	-	4.5369	4.4356	4.5339	4.4897	3.3659	3.3714	5.3452	3.318	3.322	3.2902	3.3008	5.7188	4.9779	4.6426	4.8468	4.2773	3.2277	3.1805
metab_10189	6-({5,14-dimethoxy-8,17-dioxatetracyclo[8.7.0.0?,?.0??,??]heptadeca-2(7),3,5,11(16),12,14-hexaen-6-yl}oxy)-3,4,5-trihydroxyoxane-2-carboxylic acid	C23H24O11	4.9481	-	4.6526	4.6877	4.6753	4.8392	4.375	4.534	4.458	4.5022	4.1003	4.6416	4.4275	4.6251	5.2593	4.8094	4.7696	4.0855	4.3503	4.01
metab_10191	3,7-DIHYDROXYFLAVONE	C15H10O4	4.9522	-	5.049	5.04	5.0199	5.1061	4.6771	5.1501	4.8647	4.7461	4.7592	4.9802	5.0607	5.0049	5.1269	5.1827	5.249	4.7406	4.7653	4.735
metab_10194	3,4,5-trihydroxy-6-[(2-pentyl-3-phenyloxiran-2-yl)methoxy]oxane-2-carboxylic acid	C20H28O8	4.9633	-	5.1786	5.132	5.1047	4.9438	3.9125	5.4125	4.9052	4.8351	5.2689	4.8718	5.1302	5.0527	5.3729	5.4171	5.4205	5.0447	4.6344	4.6074
metab_10241	12-(3,4-dihydroxyphenyl)-8,13-dihydroxy-6-(4-hydroxy-3-methoxyphenyl)-3,11-dioxatricyclo[8.4.0.0?,?]tetradeca-1(10),2(7),8-trien-4-one	C25H22O9	5.0592	-	4.5128	4.4736	4.5177	2.7333	2.6726	2.7329	3.066	3.1304	3.8475	3.9997	4.1383	3.9877	4.91	5.0035	5.2955	4.545	4.0572	3.7439
metab_10253	Phenylpyruvic acid	C9H8O3	5.11	Benzene and substituted derivatives	4.9397	5.012	5.0469	5.0428	4.9712	5.2748	4.8322	4.5821	4.6449	4.3954	4.5429	5.2371	4.8622	4.5576	4.7646	5.0662	4.9758	4.9677
metab_10261	(R)-Heraclenol	C16H16O6	5.1152	Coumarins and derivatives	5.7967	5.744	5.7459	5.8228	5.5765	5.8476	5.6297	5.4942	5.7288	5.7059	5.7428	5.6646	5.8702	5.8119	5.9155	5.6717	5.5962	5.6123
metab_10274	3-Oxododecanoic acid	C12H22O3	5.1549	Keto acids and derivatives	5.4003	5.3775	5.3932	5.6985	5.6809	5.6988	5.3059	5.2616	5.3619	5.6029	5.5586	5.4126	5.1181	5.367	5.2274	5.0875	5.2012	4.9487
metab_10290	Dihydromaleimide beta-D-glucoside	C10H15NO7	5.2045	Organooxygen compounds	5.9843	5.933	5.9309	6.5033	5.9852	6.1742	5.0214	5.9702	5.5001	5.5115	5.963	5.9321	6.0142	5.9917	6.0552	5.7847	5.7688	5.4437
metab_10294	6-(2,4-dihydroxyphenyl)-2-(2,6-dihydroxyphenyl)-4-methylcyclohex-3-ene-1-carboxylic acid	C20H20O6	5.2123	-	4.9999	4.9435	4.9665	4.9834	4.8329	5.3047	5.2134	5.1607	5.0165	5.1794	5.2175	4.7842	4.6879	4.88	4.8782	4.6575	4.8905	4.5687
metab_10315	Norizalpinin	C15H10O5	5.2749	Flavonoids	4.8109	4.8722	4.8552	4.7644	4.5555	4.7329	4.7877	4.6455	4.7766	4.8015	4.8216	4.9478	4.8262	4.9176	4.9426	4.4592	4.6218	4.6829
metab_10340	Scoparin 2''-xyloside	C27H30O15	5.342	-	5.8029	5.7499	5.7439	5.9419	5.7325	5.9734	5.3103	5.4441	5.6508	5.4911	5.7934	5.6932	5.5871	5.6356	5.7789	5.556	5.6225	4.9206
metab_10391	Starch acetate	C12H18O9	5.4576	Carboxylic acids and derivatives	4.653	4.6273	4.6387	4.6313	4.0624	4.5571	4.5781	4.3999	4.3421	4.1621	4.4885	4.5907	4.805	4.9606	5.0029	4.1915	3.8797	4.1308
metab_10403	Isopentenyl acetate	C7H12O2	5.4822	Carboxylic acids and derivatives	5.4312	5.5023	5.537	5.2785	5.6543	5.5147	5.7403	5.6425	5.496	5.6002	5.6134	5.6336	5.2561	5.1698	5.1859	5.5781	5.4442	5.3894
metab_10405	Hexyl glucoside	C12H24O6	5.4861	Fatty Acyls	5.2378	5.224	5.2497	5.5712	5.6076	5.5604	5.4003	5.279	5.3573	5.4781	5.2838	5.2086	4.7923	5.1958	5.1325	4.6251	4.9394	4.7194
metab_10411	Melongoside P	C51H86O23	5.5189	Steroids and steroid derivatives	5.3387	5.3232	5.293	5.6771	5.351	5.2254	5.567	5.4667	5.4858	5.2223	5.3705	5.4698	5.1996	5.3819	5.2644	4.9159	5.0837	5.003
metab_10439	Osmundalactone	C6H8O3	5.5928	Pyrans	4.1747	4.1609	4.2378	2.6223	2.5617	3.1599	4.2864	3.6244	3.1687	2.541	2.5516	4.2309	4.6178	4.9029	3.7036	2.4787	2.4787	2.4316
metab_10465	2,3-Heptanedione	C7H12O2	5.6435	Organooxygen compounds	5.3399	5.4118	5.4386	5.238	5.5918	5.3925	5.6052	5.4881	5.495	5.4586	5.516	5.5143	5.2136	5.161	5.1215	5.5666	5.3916	5.3345
metab_10516	2-methoxy-4-(prop-2-en-1-yl)phenyl 2-hydroxybenzoate	C17H16O4	5.7398	-	5.2436	5.2488	5.1903	5.4861	5.199	5.7073	4.4499	4.9968	4.4797	5.1234	4.6771	4.3626	4.7756	4.2869	5.0504	5.1803	5.6183	4.8172
metab_10561	Undecylenic acid	C11H20O2	5.8423	Fatty Acyls	5.8228	5.8383	5.8204	6.1732	6.1177	6.0665	6.0899	5.9438	5.8278	5.9075	5.8301	5.8727	5.523	5.8726	5.6417	5.4072	5.7268	5.5399
metab_10581	Eucaglobulin	C23H30O12	5.8778	Saccharolipids	4.6519	4.6477	4.6009	3.4866	3.0592	3.9989	4.5956	4.3173	3.0703	3.0385	3.7471	4.4452	4.8599	5.24	5.3186	3.8219	3.943	4.4272
metab_10586	Citalopram aldehyde	C18H14FNO2	5.8812	Isocoumarans	4.6008	4.5555	4.4512	4.2554	3.4051	4.3505	3.8002	4.1574	4.0741	5.1824	4.6925	4.3888	3.6118	4.0123	4.7572	2.8758	2.8758	4.8737
metab_10595	5-hydroxy-8-(2-hydroxypropan-2-yl)-4-(1-hydroxypropyl)-2H,8H,9H-furo[2,3-h]chromen-2-one	C17H20O6	5.898	-	4.6096	4.5864	4.5725	2.6138	2.6243	2.512	2.8541	2.4588	4.6255	4.7978	4.3941	4.0424	4.8449	5.389	3.7906	4.9406	5.599	2.7193
metab_10676	Hovenidulcioside B1	C44H70O16	6.0127	Prenol lipids	6.9032	6.9247	6.8819	6.9138	7.3213	6.9064	6.9028	7.0473	6.1287	6.5299	7.1019	6.8162	6.8111	6.798	6.6892	6.5102	6.5822	6.6015
metab_10677	6-[3,5-dihydroxy-4-(3-methylbut-2-en-1-yl)-2-[3-(2,4,5-trihydroxyphenyl)propanoyl]phenoxy]-3,4,5-trihydroxyoxane-2-carboxylic acid	C26H30O13	6.0157	-	4.923	4.9938	4.8707	4.9899	4.7385	5.082	4.7615	4.1446	5.1117	4.9711	4.9326	5.0095	4.5471	4.7479	5.0261	4.6959	4.6349	4.865
metab_10701	4-Hydroxycinnamyl aldehyde	C9H8O2	6.0525	Cinnamaldehydes	3.7356	3.7773	3.8108	3.489	3.1513	2.7712	3.9367	3.6482	3.5254	3.123	3.4794	3.64	4.0475	4.1303	3.7167	3.3246	3.2641	3.3688
metab_10702	Ethyl phenylacetate	C10H12O2	6.0525	Benzene and substituted derivatives	5.3477	5.3654	5.3703	4.7589	4.2696	4.4393	5.5549	5.1013	4.7856	4.1854	4.7729	5.2119	5.6618	5.8132	5.3747	4.2604	4.4118	4.4962
metab_10704	Albendazole S-oxide	C12H15N3O3S	6.0525	Benzimidazoles	4.5313	4.6285	4.5034	5.1187	5.3416	4.5834	4.5134	5.2547	3.4984	4.9306	3.6158	3.9504	4.7387	3.9682	4.9574	4.0446	3.9075	3.6953
metab_10749	6''-Acetylliquiritin	C23H24O10	6.097	-	4.413	4.4605	4.5175	4.5965	3.7958	4.5998	4.4752	4.3599	4.2984	4.2991	4.2002	4.625	5.0957	4.7136	4.5337	4.0074	4.1324	4.0451
metab_10765	3-hydroxy-6-[(E)-2-methoxyethenyl]-7-methyl-2H-chromen-2-one	C13H12O4	6.1109	-	3.9711	4.0879	4.057	4.3025	2.7677	3.6269	3.0449	3.4163	3.7515	3.9274	3.887	3.7666	3.8757	4.8487	4.5966	3.4304	3.5055	3.2439
metab_10793	5-Hydroxysulfamethoxazole	C10H11N3O4S	6.1317	Benzene and substituted derivatives	4.8544	4.852	4.8934	4.97	4.5224	4.7845	4.826	4.6476	4.9921	4.8731	4.9005	4.5117	4.9727	5.1261	5.1386	4.7664	4.5983	4.7124
metab_10803	3,4,5-trihydroxy-6-[(14-hydroxy-3-methyl-1,7-dioxo-3,4,5,6,7,8,9,10-octahydro-1H-2-benzoxacyclotetradecin-16-yl)oxy]oxane-2-carboxylic acid	C24H30O11	6.1402	-	4.5962	4.7585	4.7008	3.693	3.6322	4.522	4.5987	4.6223	3.6433	4.8224	4.0775	4.5173	4.9382	4.9551	5.172	4.0293	3.549	5.168
metab_10831	3,4-Methylenesebacic acid	C12H18O4	6.164	Fatty Acyls	4.4302	4.4274	4.4843	4.6806	4.6574	4.6195	4.5724	4.5401	4.6165	4.5611	4.378	4.425	4.2285	4.4205	4.3864	4.2389	4.3347	4.2918
metab_10842	2-(2,4-dihydroxy-5-methoxyphenyl)-3-(3,7-dimethylocta-2,6-dien-1-yl)-5,7-dihydroxy-6-(3-methylbut-2-en-1-yl)-3,4-dihydro-2H-1-benzopyran-4-one	C31H38O7	6.1675	-	4.6262	4.6696	4.6662	4.7579	4.7305	4.9867	4.1793	5.0265	4.7585	4.5001	4.2439	4.5197	4.9355	4.9416	4.8849	4.7349	4.4116	4.3075
metab_10844	CAY10616	C17H18O4	6.1744	-	3.6759	3.7344	3.6701	2.8287	2.6329	2.6932	2.9997	3.8362	2.6439	3.9839	3.2147	2.615	3.968	3.8278	3.9625	2.5648	2.5498	3.6114
metab_10872	Phaseolic acid	C12H22O6	6.1889	Keto acids and derivatives	5.1739	5.1909	5.242	5.3299	5.4574	5.512	5.5404	5.4045	5.2288	5.4243	5.0808	5.1978	5.0232	5.1278	5.0947	4.7966	4.9828	4.8131
metab_10885	Pulmatin	C21H20O9	6.1958	Anthracenes	4.885	4.9076	4.9547	4.5607	4.6394	4.8502	5.1871	5.413	5.4187	4.4728	4.6522	4.9698	5.1267	4.8416	5.0394	5.0315	5.0618	4.9121
metab_10896	Sanguisorbin E	C43H68O13	6.2027	Prenol lipids	6.3679	6.3995	6.4303	6.4484	6.6286	6.529	6.3443	6.6718	6.0864	5.941	6.4033	6.2483	6.2849	6.3308	6.2085	6.1707	6.0447	6.0988
metab_10903	Ginsenoside Rh6	C36H62O11	6.2091	Prenol lipids	5.7659	5.8009	5.8244	5.9189	6.2902	5.9998	5.4503	6.1989	4.7323	4.964	5.8741	5.2818	4.9049	5.6059	5.5014	4.3514	4.3514	4.9492
metab_10907	2,3-dinor, 6-keto-PGF1alpha	C18H30O6	6.216	Fatty Acyls	6.2359	6.2177	6.2469	6.539	6.6653	6.6383	6.3734	6.4893	6.375	6.3707	5.964	6.1218	6.0552	6.221	6.0703	5.288	5.626	5.4165
metab_10916	Acetyljujuboside B	C54H86O22	6.2229	Prenol lipids	4.5939	4.5087	4.5176	4.8795	5.0589	4.934	5.0998	4.8519	5.1521	4.7575	4.1896	4.5948	3.2221	4.4141	4.3655	3.3215	4.2398	3.8956
metab_10941	Hoduloside I	C48H78O19	6.25	Prenol lipids	6.1396	6.1013	6.0869	5.9825	5.9758	5.6632	6.0878	5.7946	5.9043	6.4005	6.4103	6.3829	6.0715	6.1276	6.0964	5.9263	6.044	6.4031
metab_10954	6-(3,4-dihydroxy-6-methyl-5-oxooxan-2-yl)-5,7-dihydroxy-2-(3-hydroxyphenyl)-4H-chromen-4-one	C21H18O9	6.2698	-	5.2553	5.2263	5.2005	5.1746	5.0857	5.1025	5.282	5.2819	5.3245	5.2385	5.2374	5.2711	5.2256	5.21	5.1991	5.3811	5.336	5.3763
metab_10960	Cyclohexyl acetate	C8H14O2	6.2767	Carboxylic acids and derivatives	4.6091	4.5446	4.5741	3.9701	4.6668	4.6891	4.4705	4.5541	4.3397	4.7871	3.2571	4.7325	5.0422	4.5301	4.3723	2.7608	2.8283	2.7136
metab_10967	5,6-Dihydroxyprostaglandin F1a	C20H36O7	6.2831	Fatty Acyls	5.2083	5.2368	5.2378	5.3514	5.4284	5.4204	5.3261	5.016	5.2498	5.0748	5.4991	5.384	5.117	5.1628	5.1308	5.2173	5.3571	5.3708
metab_10988	5,7-dihydroxy-2-(3-methoxyphenyl)-3,4-dihydro-2H-1-benzopyran-4-one	C16H14O5	6.296	-	4.0695	4.0436	4.1077	3.6342	2.8311	3.8867	2.8323	2.8382	3.6719	4.023	3.7477	3.6634	5.0044	4.5438	5.0353	4.1971	3.1019	2.7008
metab_10998	13,14-Dihydro PGF-1a	C20H38O5	6.3028	Fatty Acyls	4.7698	4.8564	4.79	5.2491	5.1768	5.1564	4.79	4.8708	5.2289	4.7254	4.7166	4.8304	4.6602	4.6085	4.5288	4.4179	4.5001	4.4645
metab_11025	2-Ethyl-1-hexanol sulfate	C8H18O4S	6.3211	Organic sulfuric acids and derivatives	4.2178	4.2595	4.2815	4.6011	4.7806	4.2294	4.0502	4.0902	4.0516	3.9782	4.1403	4.0073	4.1813	4.1745	4.0986	3.87	3.9416	3.9092
metab_11029	1-O-E-Cinnamoyl-(6-arabinosylglucose)	C20H26O11	6.3211	Cinnamic acids and derivatives	5.8336	5.7902	5.802	5.3607	3.5606	5.0216	5.4031	5.2853	5.8367	5.5582	5.7823	5.8492	6.3894	6.1718	6.5151	6.082	5.6344	5.2773
metab_11045	16-Hydroxy-10-oxohexadecanoic acid	C16H30O4	6.3348	Fatty Acyls	4.1892	4.2991	4.117	3.362	4.0915	4.3393	4.1232	4.098	3.2561	4.3828	3.2405	4.1975	4.8559	4.1392	4.2269	3.0335	3.0388	2.9973
metab_11050	7-HYDROXY-2'-METHOXYISOFLAVONE	C16H12O4	6.3417	-	6.0566	6.0113	6.0496	6.1568	5.8217	6.0367	6.1603	5.9681	6.0931	5.9786	6.0005	5.9894	6.109	6.1428	6.1573	5.9164	5.9668	5.8121
metab_11052	6-(3,4-dihydroxyphenyl)-8,13-dihydroxy-12-(4-hydroxy-3-methoxyphenyl)-3,11-dioxatricyclo[8.4.0.0?,?]tetradeca-1(10),2(7),8-trien-4-one	C25H22O9	6.3417	-	4.9368	4.88	4.9145	4.9997	3.4529	3.5133	3.7104	4.0913	5.165	4.8827	4.8082	4.8277	5.4333	5.398	5.9079	5.1419	5.0754	4.7584
metab_11060	6-({4,5-dihydroxy-2-methyl-6-[(3,4,5,6-tetrahydroxyoxan-2-yl)methoxy]oxan-3-yl}oxy)-3,4,5-trihydroxyoxane-2-carboxylic acid	C18H30O16	6.3491	-	4.5557	4.6373	4.7396	4.0553	3.5162	5.05	3.5726	3.5233	4.6351	5.1043	4.8456	4.6527	4.9608	4.8994	5.7183	4.9139	4.7031	3.3858
metab_11066	Momorcharaside B	C36H62O10	6.356	Steroids and steroid derivatives	5.7229	5.8395	5.8341	5.752	6.2797	6.1006	5.5659	6.2558	5.187	4.7994	6.0045	5.2428	5.1231	5.7125	5.4332	4.3275	4.7592	5.1071
metab_11067	Thromboxane B3	C20H32O6	6.356	Fatty Acyls	6.8219	6.912	6.9059	6.8206	7.4632	6.9794	6.3198	7.3552	5.5801	5.8088	7.0136	6.3327	6.212	6.6897	6.2685	3.8018	5.9253	6.3193
metab_11075	Cynarasaponin H	C47H74O18	6.3629	Prenol lipids	5.2299	5.3657	5.2585	5.4997	5.6327	5.5971	4.9168	5.5627	4.5801	4.5525	5.4917	5.0075	5.3926	5.1509	5.3159	5.0484	4.4858	5.0119
metab_11100	Tyrosyl-Valine	C14H20N2O4	6.3903	Carboxylic acids and derivatives	4.1006	4.3964	4.1893	4.4379	3.6876	4.6074	4.1909	4.2791	4.3656	4.0257	3.8044	4.2895	4.5336	4.5675	4.4837	3.308	3.4991	4.1794
metab_11107	N-Nonanoylglycine	C11H21NO3	6.4041	Carboxylic acids and derivatives	4.6338	4.6062	4.604	4.3679	4.3607	4.2708	4.6572	4.5791	4.5858	4.3197	4.5901	4.6846	4.5663	4.6065	4.4842	4.6741	4.748	4.6977
metab_11119	Deoxydihydro-artemisinin	C15H24O4	6.4178	Dioxolopyrans	4.6258	4.5914	4.548	4.7686	4.9251	4.9056	4.6229	4.7609	4.7954	4.7987	4.3344	4.6414	4.5532	4.6386	4.5555	4.2726	4.3845	4.258
metab_11131	Cis-3-Hexenyl lactate	C9H16O3	6.4326	Carboxylic acids and derivatives	5.1951	5.2245	5.2648	5.0912	5.0277	5.0058	5.2128	5.133	5.2062	5.1624	5.2406	5.301	5.1878	5.2538	5.1481	5.3471	5.3189	5.3498
metab_11147	1,11-Undecanedicarboxylic acid	C13H24O4	6.4624	Fatty Acyls	5.1092	5.1454	5.1521	4.9837	4.9739	4.9413	5.0992	5.1131	5.1277	5.0673	5.1017	5.1331	5.1211	5.1794	5.1519	5.2154	5.2105	5.208
metab_11172	Descladinose roxithromycin	C33H62N2O12	6.4841	Organooxygen compounds	5.5812	5.5742	5.571	5.5393	6.0541	5.9587	4.6634	5.8207	5.2725	5.1635	5.4897	4.9339	4.921	5.2241	5.7001	3.6592	3.6592	4.802
metab_11183	[4-(3-hydroxybutyl)-2-methoxyphenyl]oxidanesulfonic acid	C11H16O6S	6.4979	-	4.5043	4.4133	4.4415	4.6473	4.1052	4.2419	4.1432	4.0876	4.4635	4.5883	4.5557	4.5833	4.5139	4.96	4.9726	4.4547	4.5153	4.0671
metab_11189	7(14)-Bisabolene-2,3,10,11-tetrol	C15H28O4	6.5048	Prenol lipids	4.5066	4.4449	4.5508	4.9502	4.8347	4.8384	4.489	4.5013	4.6974	4.6665	4.595	4.446	4.1463	4.5124	4.455	3.7837	4.1967	4.0296
metab_11206	Lansioside C	C35H56O7	6.5192	Organooxygen compounds	5.2487	5.1989	5.2317	5.5032	5.3776	5.4013	5.9276	5.7764	4.2454	5.4572	4.8743	5.2402	4.0556	4.4306	4.7611	3.3248	3.484	3.9578
metab_11211	Alliosterol 1-rhamnoside 16-galactoside	C39H66O13	6.5256	Steroids and steroid derivatives	4.9476	4.9193	4.9998	4.5139	5.8148	5.4501	3.4299	5.2327	4.0578	4.2261	4.61	3.4109	3.4088	4.323	4.4417	3.3455	3.3455	3.2983
metab_11219	1-Octen-3-yl glucoside	C14H26O6	6.536	Fatty Acyls	4.2906	4.4105	4.3589	3.2339	3.033	3.0934	3.0341	3.04	3.0441	3.0122	3.0228	3.0151	4.9906	5.2882	5.5247	2.9498	2.9498	2.9026
metab_11224	Prostaglandin F2a	C20H34O5	6.5428	Fatty Acyls	4.1236	4.0271	4.1152	4.521	4.9393	4.6242	3.245	4.553	3.2549	3.2231	3.2337	3.226	3.224	3.3281	3.2157	3.1607	3.1607	3.1134
metab_11234	12S-HHTrE	C17H28O3	6.5541	-	4.6627	4.6122	4.7405	4.7593	4.9448	5.1846	5.002	4.8463	4.2118	4.924	4.3596	4.4735	4.8307	4.5418	4.5065	3.007	4.1105	3.5967
metab_11253	PS(14:0/18:2(9Z,12Z))	C38H70NO10P	6.5928	Glycerophospholipids	4.575	4.4172	4.4574	4.7443	4.6568	5.2206	3.6859	4.4113	3.543	2.8683	3.8111	3.1549	3.5006	2.7665	3.3244	3.7148	2.6784	3.4898
metab_11256	Garcinone B	C23H22O6	6.5978	Benzopyrans	4.8115	4.9819	5.0134	5.0329	4.878	5.1138	4.9687	4.965	4.898	5.0398	4.8158	4.6552	4.7439	4.909	4.9082	4.1591	4.6077	4.1618
metab_11273	N-Lauroylglycine	C14H27NO3	6.6355	Carboxylic acids and derivatives	4.814	4.8165	4.8758	4.3689	4.2445	4.1525	4.1885	4.3358	4.2239	4.5875	5.0948	4.6798	4.3738	4.2486	4.4274	4.2917	4.3708	4.4973
metab_11276	3-?Methyl-?5-?propyl-2-?furantridecanoic acid	C21H36O3	6.6404	Fatty Acyls	4.8516	4.7426	4.7372	5.2651	5.1645	5.2434	4.8806	4.7851	5.0037	4.9969	4.78	4.7706	3.7746	4.5705	4.6708	3.68	4.3247	4.2392
metab_11281	13-Hydroxy-9-methoxy-10-oxo-11-octadecenoic acid	C19H34O5	6.6542	Fatty Acyls	5.2243	5.1273	5.148	5.5158	5.3899	5.4915	5.0993	5.1982	4.9663	5.0498	5.2159	4.8672	4.9357	4.9674	4.9248	4.2613	4.8411	4.6225
metab_11282	Gartanin	C23H24O6	6.6542	Benzopyrans	5.0284	5.0956	5.1127	5.2614	5.1133	5.2665	5.0225	5.1191	4.9632	5.0639	5.1976	4.8593	4.9446	5.0062	4.9238	4.2219	4.8184	4.6227
metab_11326	Myristoylglycine	C16H31NO3	6.757	Carboxylic acids and derivatives	4.3567	4.183	4.1482	3.7226	3.5707	3.018	3.6532	3.493	3.1523	3.8744	4.6092	3.874	3.972	3.8742	3.84	3.663	3.8192	3.9934
metab_11336	Xi-10-Hydroxyoctadecanoic acid	C18H36O3	6.7783	Fatty Acyls	4.3444	4.22	4.1392	3.8256	3.9163	3.9504	3.7213	4.3563	3.66	3.5376	4.931	3.4536	3.4802	3.233	3.1791	3.2375	3.1179	3.7698
metab_11360	Blumenol C O-[rhamnosyl-(1->6)-glucoside]	C25H42O11	6.8344	Fatty Acyls	4.9643	4.9586	5.015	3.8808	3.7099	3.7704	4.5232	4.5112	4.3174	4.5217	4.652	4.7588	4.9826	4.8969	4.881	5.2049	4.8756	5.1982
metab_11406	1-(11Z,14Z-eicosadienoyl)-glycero-3-phosphate	C23H43O7P	6.9366	Glycerophospholipids	6.2653	6.1929	6.1969	6.5301	6.3862	6.533	6.3196	6.3465	6.3054	6.0149	6.0244	6.0215	6.1378	6.2323	6.2039	5.7089	5.8851	6.0006
metab_11422	Prostaglandin G2 2-glyceryl Ester	C23H38O8	6.9774	Fatty Acyls	5.1569	5.143	5.0653	5.4276	5.1301	5.2686	5.5246	5.2817	5.3678	4.8575	4.8956	4.8927	4.4496	4.7901	4.7077	4.7747	4.262	4.595
metab_11443	DL-2-hydroxy stearic acid	C18H36O3	7.0289	-	5.1325	5.1798	5.1288	5.2891	5.2376	5.2491	5.4936	5.1709	4.9604	5.3342	5.0988	5.1453	4.9584	5.0475	5.046	4.7799	5.1017	4.8817
metab_11448	Tyr His Asp Asp	C23H28N6O10	7.0415	-	5.9303	5.8826	5.857	6.2822	6.2164	6.536	6.57	6.3807	6.3594	6.1578	5.9256	6.3054	6.0766	5.9431	5.8943	5.2525	5.0126	5.315
metab_11461	1-Palmitoylglycerophosphoinositol	C25H49O12P	7.108	Glycerophospholipids	5.3718	5.2992	5.1771	5.1348	5.5584	5.633	5.2067	5.3567	5.1811	5.4376	5.3537	5.464	5.4707	5.0536	5.2239	5.1908	5.2674	5.1727
metab_11469	Physapubescin	C30H42O8	7.1217	Fatty Acyls	5.9142	5.8503	5.7821	6.0205	5.8546	5.9214	5.8846	5.8676	5.7109	5.6061	5.6536	5.573	5.5692	5.699	5.5837	5.3975	5.4648	5.3801
metab_11470	Asticolorin A	C33H30O7	7.1286	Benzopyrans	5.8107	5.7547	5.7123	6.2593	6.1341	6.2148	6.1696	6.0087	5.9507	5.7832	5.8228	5.7177	5.7064	5.859	5.7625	5.4159	5.5351	5.429
metab_11482	PE(18:3(6Z,9Z,12Z)/18:3(6Z,9Z,12Z))	C41H70NO8P	7.1781	Glycerophospholipids	5.4196	5.3186	5.3542	4.9586	4.9239	4.4237	3.9065	3.9125	4.286	5.0468	5.3528	5.1232	5.0697	5.1484	5.2361	6.0157	6.0371	5.4487
metab_11489	Glyceryl lactooleate	C24H44O6	7.2051	Fatty Acyls	5.3723	5.2975	5.2797	3.6117	3.5509	4.0604	3.5521	5.3918	3.562	3.5302	5.0404	3.5704	5.6861	5.963	5.9734	4.694	4.3998	5.8037
metab_11512	Withanolide A	C28H38O6	7.256	Steroids and steroid derivatives	5.878	5.8215	5.7419	6.0593	5.9032	6.1515	6.2054	6.0895	5.9291	5.6985	5.6866	5.794	5.6381	5.4464	5.385	4.8946	4.7043	4.9019
metab_11520	GPEtn(18:2/18:3)	C41H72NO8P	7.2904	Glycerophospholipids	6.1376	6.0045	6.0258	5.694	5.6598	5.4448	5.3016	5.1208	5.3658	5.8641	6.121	5.9071	5.814	5.9179	5.9613	6.4999	6.5355	6.2277
metab_11521	PS(18:2(9Z,12Z)/18:2(9Z,12Z))	C42H74NO10P	7.2904	Glycerophospholipids	5.0281	4.8136	4.8016	4.0897	4.3758	4.0894	4.0301	4.036	4.04	4.4479	5.0125	4.5883	4.5551	4.5327	4.8501	5.5028	5.5765	5.2367
metab_11528	2(R)-hydroxydocosanoic acid	C22H44O3	7.3242	Fatty Acyls	5.1585	5.1565	5.1738	5.461	5.2014	5.228	5.4241	5.058	5.1653	5.1748	5.2973	5.2545	4.9529	4.9977	5.1162	5.239	5.3617	5.1645
metab_11550	PA(16:0/22:0)	C41H81O8P	7.4327	Glycerophospholipids	5.1812	4.984	4.9505	5.1964	4.7927	5.1656	5.2657	5.34	5.2168	5.1747	5.0561	5.0773	4.6084	4.556	4.9738	4.0299	4.4496	4.9321
metab_11580	PA(16:0/18:3(6Z,9Z,12Z))	C37H67O8P	7.6105	Glycerophospholipids	3.9173	3.8151	3.8078	4.4932	5.9618	4.9091	4.022	4.3669	3.8084	5.5998	3.9096	3.7794	3.7774	3.7682	3.7691	3.7141	3.714	3.6668
metab_11595	PC(18:3(6Z,9Z,12Z)/18:3(6Z,9Z,12Z))	C44H76NO8P	7.7618	Glycerophospholipids	6.2907	6.1741	6.1396	5.598	5.2518	4.8244	4.1958	4.2017	4.6259	5.8595	6.0513	5.6248	5.4469	6.0423	5.9658	6.7848	6.8014	6.2287
metab_11618	PA(20:3(8Z,11Z,14Z)/18:2(9Z,12Z))	C41H71O8P	7.9541	Glycerophospholipids	5.9157	5.6994	5.8077	3.8259	3.7645	5.0987	3.7312	5.9384	3.7411	3.778	5.5622	4.2834	5.9584	6.4871	6.3586	5.6283	5.6963	6.1448
metab_11634	PI(16:0/16:0)	C41H79O13P	8.1774	Glycerophospholipids	7.1615	7.0539	7.018	6.6367	6.7136	6.7145	6.7985	6.9066	6.822	7.1193	7.135	7.1866	7.1446	6.9727	7.1267	7.3136	7.2593	7.1135
metab_11636	PC(18:2(9Z,12Z)/18:3(6Z,9Z,12Z))	C44H78NO8P	8.1946	Glycerophospholipids	6.7634	6.6578	6.6075	6.0096	5.7299	5.1604	3.8655	3.329	4.9034	6.2627	6.5452	6.1419	6.0233	6.395	6.4771	7.1853	7.2309	6.9046
metab_11637	PA(20:2(11Z,14Z)/18:2(9Z,12Z))	C41H73O8P	8.2174	Glycerophospholipids	5.9389	5.8102	5.9121	3.7927	3.7105	4.9128	3.7117	6.0245	3.7216	3.6898	5.6469	4.5467	6.1067	6.5114	6.5028	5.5519	5.6755	6.3392
metab_11640	PA(18:0/16:0)	C37H73O8P	8.2793	Glycerophospholipids	5.6579	5.4848	5.4955	3.6878	3.627	4.4098	3.6281	5.6323	3.7394	3.9969	5.4159	3.698	5.6923	6.2873	6.1895	5.3032	5.3533	5.7918
metab_12286	PC(18:1(11Z)/18:3(6Z,9Z,12Z))	C44H80NO8P	8.716	Glycerophospholipids	5.8247	5.6827	5.7556	3.9976	3.9368	3.9973	3.938	3.9439	3.9479	3.9317	5.5712	4.2884	3.917	4.5541	4.7995	6.5851	6.7119	6.553
metab_12352	DG(20:5(5Z,8Z,11Z,14Z,17Z)/22:6(4Z,7Z,10Z,13Z,16Z,19Z)/0:0)	C45H66O5	8.1453	Glycerolipids	7.7869	7.7185	7.6862	7.7126	7.6837	7.7915	7.9371	7.7312	7.7913	7.853	7.8179	7.9562	7.7843	7.7664	7.7459	7.5957	7.5772	7.4417
metab_12373	PA(16:0/18:2(9Z,12Z))	C37H69O8P	7.8799	Glycerophospholipids	6.3968	6.3554	6.2061	6.5991	6.4314	6.2746	6.5652	6.3433	6.5631	6.2758	6.3061	6.2181	6.0527	6.048	6.1019	6.2399	6.355	6.1436
metab_12378	GPA(18:1/18:2)	C39H71O8P	7.8538	-	5.9154	5.7712	5.6808	5.9081	5.664	5.3978	6.0571	5.7448	6.0288	5.7238	5.7825	5.7737	5.5436	5.6454	5.6138	5.8535	5.9318	5.7968
metab_12402	GPA(16:0/18:3)	C37H67O8P	7.6757	-	6.4502	6.3991	6.2902	6.6628	6.4619	6.31	6.631	6.3691	6.5911	6.3385	6.3758	6.3288	6.0954	6.1897	6.1973	6.3719	6.4357	6.1861
metab_12416	PE(18:1(11Z)/18:2(9Z,12Z))	C41H76NO8P	7.5845	Glycerophospholipids	5.2694	5.0394	5.1282	4.0623	4.0015	4.062	4.0027	4.0086	4.0126	4.6093	5.2018	4.9973	5.0639	5.1218	5.244	5.7984	5.6579	5.8078
metab_12434	GPA(18:2/18:3)	C39H67O8P	7.492	-	6.8302	6.7727	6.6743	7.0092	6.807	6.7415	6.9802	6.7825	6.9979	6.7242	6.7232	6.6784	6.5206	6.628	6.616	6.7324	6.8221	6.6093
metab_12439	Sorbitan stearate	C24H46O6	7.4669	Fatty Acyls	4.3941	4.3033	4.4237	3.6498	3.589	3.6495	3.5902	4.8833	3.6001	3.5683	4.0679	3.5712	4.6914	5.4938	5.2322	3.5058	3.5058	4.3899
metab_12443	PE(16:0/18:3(6Z,9Z,12Z))	C39H72NO8P	7.4532	Glycerophospholipids	6.1261	5.9691	6.0247	5.9959	5.8688	5.9185	5.7782	5.9459	5.9457	6.1487	6.1941	6.0716	6.0427	6.1781	6.1336	6.4261	6.3746	6.2145
metab_12450	PE(18:1(11Z)/18:3(6Z,9Z,12Z))	C41H74NO8P	7.4189	Glycerophospholipids	6.2575	6.1051	6.1102	5.7123	5.6057	5.5417	5.4377	5.3099	5.5078	5.9282	6.1917	6.043	5.9719	5.9773	6.1139	6.5155	6.49	6.448
metab_12462	GPA(18:3/18:3)	C39H65O8P	7.3639	-	6.3612	6.3379	6.2372	6.6464	6.416	6.3564	6.5619	6.2766	6.5562	6.2443	6.2637	6.1916	6.054	6.1382	6.1377	6.3999	6.4218	6.0928
metab_12488	Terretonin	C26H32O9	7.256	Steroids and steroid derivatives	6.0219	5.9992	5.9753	6.6003	6.4875	6.7354	6.8411	6.5566	6.4705	6.2929	6.1052	6.2758	6.0682	5.9412	5.8995	5.2056	5.149	5.0817
metab_12501	LysoPC(17:0)	C25H52NO7P	7.2359	Glycerophospholipids	5.0195	5.029	4.9414	5.0993	5.1235	5.0349	5.1598	4.8504	5.1884	5.0492	5.2382	4.9448	4.6715	4.8873	4.9854	4.2217	4.7834	4.5496
metab_12512	Sorbitan palmitate	C22H42O6	7.1987	Fatty Acyls	5.7948	5.7142	5.6968	5.2251	5.102	5.8202	5.3257	6.1456	5.2484	4.9207	5.595	5.0257	5.8981	6.386	6.2803	4.9599	5.2384	5.863
metab_12559	Sambacin	C26H36O12	7.0289	Organooxygen compounds	4.7904	4.7227	4.911	3.6507	3.5899	5.2005	3.6845	5.7141	3.601	3.5691	4.861	3.9878	5.5811	5.9378	5.8555	4.4229	4.1427	5.5322
metab_12584	1-Oleoyl Lysophosphatidic Acid (sodium salt)	C21H41O7P	6.9774	-	5.7178	5.609	5.6249	5.5976	5.4578	5.5021	6.0574	5.811	5.9652	5.6865	5.6372	5.7325	5.4517	5.5179	5.6631	5.462	5.4239	5.5138
metab_12587	12-hydroxyheptadecanoic acid	C17H34O3	6.9638	Fatty Acyls	4.2125	4.4872	4.3207	4.1982	4.4415	4.5484	4.8674	4.4494	3.719	4.532	3.6496	3.9701	3.4059	3.8853	4.1179	3.3426	3.4414	3.7801
metab_12589	PG(a-13:0/18:2(9Z,11Z))	C37H69O10P	6.957	Glycerophospholipids	5.8225	5.8215	5.7487	6.2385	6.4305	6.236	5.9662	5.8966	6.0894	6.138	5.6587	5.5985	5.4146	5.4515	5.5146	5.2648	5.6344	5.1863
metab_12634	PE(20:1/0:0)	C25H50NO7P	6.8826	-	6.0232	5.9572	5.9391	5.6393	5.4287	5.5136	5.9436	5.8814	5.8208	5.7618	5.9472	5.8514	5.9774	5.8531	5.9918	5.8974	5.7122	6.0282
metab_12641	3a,7b,21-Trihydroxy-5b-cholanoic acid	C24H40O6	6.862	Steroids and steroid derivatives	5.6382	5.6497	5.7003	4.1249	4.5674	5.6165	4.2563	6.0141	3.9269	3.4384	5.3972	4.3795	5.8579	6.2741	6.2165	5.2711	5.4163	5.8822
metab_12642	3a,7a,12b-Trihydroxy-5b-cholanoic acid	C24H40O5	6.8551	-	6.1026	6.0855	6.0738	6.3851	6.2228	6.4043	6.4753	6.2678	6.3827	6.0714	5.9443	6.2488	6.0429	6.0704	5.9504	5.5673	5.5394	5.4564
metab_12658	1-Stearoylglycerophosphoserine	C24H48NO9P	6.8344	Glycerophospholipids	5.6764	5.5483	5.6077	5.067	4.9207	4.9531	5.241	5.2956	5.2669	5.277	5.4582	5.3706	5.643	5.5376	5.6095	5.7423	5.5324	5.7634
metab_12661	PE(18:1(9Z)/0:0)	C23H46NO7P	6.8275	-	6.7081	6.6505	6.6775	6.3319	6.2229	6.2735	6.4952	6.4545	6.4269	6.4382	6.6156	6.5346	6.7349	6.6742	6.7105	6.7933	6.617	6.8524
metab_12676	3-Oxohexadecanoic acid	C16H30O3	6.803	Fatty Acyls	4.7725	4.7846	4.71	4.9542	4.789	4.9298	5.0972	5.0887	4.9383	4.832	4.6146	4.4808	4.751	4.5116	4.7729	3.8798	4.1225	4.1479
metab_12700	Dehydroisoandrosterone 3-glucuronide	C25H36O8	6.7646	Steroids and steroid derivatives	5.0836	4.8887	4.9684	5.2555	5.1686	5.1455	5.1285	5.1169	5.2525	4.8055	4.7467	4.7886	4.439	4.7943	4.7615	4.7868	4.7777	4.4792
metab_12701	1-(6Z,9Z,12Z-octadecatrienoyl)-glycero-3-phosphate	C21H37O7P	6.757	Glycerophospholipids	6.157	6.0998	6.0827	6.3794	6.3063	6.3076	6.3098	6.2173	6.3625	6.0547	5.9717	6.0408	5.8648	6.0009	5.9504	5.9694	5.934	5.7629
metab_12743	PE(15:1/0:0)	C20H40NO7P	6.6808	-	5.0313	5.0619	5.0091	5.1352	5.0046	5.1143	4.8084	4.9085	4.8974	4.7043	5.0442	4.8658	4.9549	4.9671	4.8588	4.7475	4.8294	4.6867
metab_12759	(R)-Laudanidine	C20H25NO4	6.6542	Isoquinolines and derivatives	4.5932	4.7927	4.658	4.9354	4.7384	4.9063	4.6747	4.7552	4.4684	4.7351	4.9415	4.5842	4.5834	4.5898	4.5985	3.696	4.4856	4.2532
metab_12766	Hovenidulcigenin A	C32H48O7	6.6473	Prenol lipids	5.9482	5.9177	5.8832	5.8096	5.7039	5.8205	5.9444	5.8378	5.8889	5.6667	5.6361	5.6781	5.7383	5.8445	5.8527	5.8538	5.8013	5.6009
metab_12783	3-(5,6,6-Trimethylbicyclo[2.2.1]hept-1-yl)cyclohexanol	C16H28O	6.6072	Prenol lipids	4.5902	4.5744	4.578	4.8156	4.9359	5.0574	4.7235	4.5493	4.0689	4.9367	4.4588	4.4234	4.5001	4.3355	4.4531	3.6136	4.2085	3.7595
metab_12794	Tsugarioside B	C37H60O7	6.5928	Prenol lipids	5.9101	5.8881	5.9379	6.0504	6.0376	6.3226	5.7617	6.1068	5.0555	5.0681	5.8646	5.2813	5.4908	5.4145	5.6445	4.4172	4.7976	5.4168
metab_12796	15-Deoxy-d-12,14-PGJ2	C20H28O3	6.5928	Fatty Acyls	4.9829	5.0137	5.0949	5.2913	5.0959	5.2322	5.0352	4.9764	4.952	4.9796	4.9163	4.7418	4.8803	5.0012	4.9482	4.3225	4.7682	4.3185
metab_12817	5-Nonyltetrahydro-2-oxo-3-furancarboxylic acid	C14H24O4	6.561	Lactones	4.1918	4.2109	4.2416	2.9929	3.803	4.1989	3.3993	3.2632	3.5442	4.1421	4.4766	3.9496	3.6566	3.8981	4.0163	3.5711	4.8282	3.9001
metab_12819	(+/-)12,13-DiHOME	C18H34O4	6.5541	-	6.1558	6.148	6.1967	6.3662	6.3853	6.4683	6.067	6.1782	6.2568	6.2053	6.1759	6.0457	5.9761	6.062	6.135	5.692	5.8827	6.0269
metab_12825	Avocadene	C17H34O3	6.5492	Fatty Acyls	4.4123	4.4051	4.3904	4.1127	4.3671	4.3999	4.6722	4.7223	4.1237	4.6082	4.0197	4.3929	4.4285	4.6354	4.5149	3.0118	3.8426	3.6054
metab_12853	Sanchinoside B1	C36H62O9	6.5192	Prenol lipids	4.5009	4.5934	4.5732	4.477	5.2568	5.3754	4.3299	5.1311	3.7004	3.6686	4.7076	3.6714	3.6694	4.3802	4.4579	3.6061	3.6061	3.5588
metab_12858	(3b,22a)-12-Oleanene-3,22,24,29-tetrol 3-[arabinosyl-(1->3)-arabinoside]	C40H66O12	6.5123	Prenol lipids	6.1383	6.1002	6.1205	6.0522	6.7827	6.4528	5.4282	6.4829	4.3866	4.898	6.0448	5.1592	5.0371	5.6991	5.8594	4.2302	4.2302	5.1746
metab_12884	9(S)-HpOTrE	C18H30O4	6.4979	-	6.7634	6.7738	6.8006	7.0933	7.0457	7.1294	6.9194	6.8895	6.8303	6.8839	6.8036	6.7077	6.6803	6.7489	6.6981	6.1729	6.4291	6.2244
metab_12892	Lysyl-Hydroxyproline	C11H21N3O4	6.491	Carboxylic acids and derivatives	4.8989	4.7876	4.7891	4.8867	4.327	5.0056	4.7298	4.5851	4.3408	5.125	4.7524	4.7877	5.0786	4.9083	5.0212	4.3115	4.5418	4.7927
metab_12934	(2E,4E)-2,4-Octadien-1-ol	C8H14O	6.4624	Fatty Acyls	5.215	5.241	5.2414	5.1756	5.5297	5.7227	5.2164	5.1697	4.8708	5.3749	4.8763	5.2381	5.3873	5.1385	5.1841	4.3409	4.7103	4.9028
metab_12938	1-Acetoxy-2-hydroxy-16-heptadecen-4-one	C19H34O4	6.4584	Fatty Acyls	5.3225	5.3812	5.3856	5.4258	5.9513	5.5738	5.0214	5.7634	4.651	4.5618	5.2762	4.7132	4.6294	4.9846	4.7435	3.8367	4.0926	4.3135
metab_12939	(1(10)E,4a,5E)-1(10),5-Germacradiene-12-acetoxy-4,11-diol	C17H28O4	6.4584	Prenol lipids	4.8675	4.8524	4.8539	4.8727	5.1413	5.2163	5.0225	5.0148	4.5423	5.1485	4.3543	4.7923	4.9784	4.7678	4.8312	3.9521	4.1501	4.1355
metab_12958	CDP-DG(16:0/16:0)	C44H81N3O15P2	6.4291	Glycerophospholipids	5.2621	5.3094	5.3251	5.5566	4.7137	4.259	4.6446	4.7028	3.8733	6.3078	5.4335	5.7357	5.3315	4.9805	4.4625	4.8397	4.1528	5.4438
metab_12982	(Z)-3-Oxo-2-(2-pentenyl)-1-cyclopenteneacetic acid	C12H16O3	6.4109	Organooxygen compounds	4.4881	4.4222	4.4427	4.2954	4.1941	4.3068	4.4893	4.386	4.5328	4.4871	4.3501	4.4989	4.4416	4.4808	4.499	4.5158	4.553	4.5429
metab_12983	3-Sulfinoalanine	C3H6NO4S	6.4109	Carboxylic acids and derivatives	4.4374	4.4592	4.4671	4.2981	4.2351	4.1887	4.4519	4.4268	4.4871	4.4088	4.4174	4.4684	4.443	4.4655	4.4517	4.5627	4.5751	4.5962
metab_12991	SQDG(2:0/26:2)	C37H66O12S	6.3972	-	6.048	6.0396	6.0702	6.1263	6.6053	6.0783	5.4684	6.745	3.6779	5.2475	6.0591	5.4731	5.4021	5.9369	5.2742	3.5836	5.1678	5.5401
metab_13001	Corchorifatty acid D	C18H28O4	6.3903	Fatty Acyls	5.8995	5.9063	5.9225	6.3281	6.2932	6.3017	5.9774	5.9581	6.0956	6.0161	5.9067	5.8259	5.6876	5.8509	5.8264	5.2143	5.4586	5.3168
metab_13010	Theaspirane	C13H22O	6.3835	Tetrahydrofurans	4.3901	4.4731	4.4869	4.9408	5.0658	5.0209	4.1469	4.3316	4.3038	4.4015	4.6093	4.318	4.6717	4.3485	4.2021	3.983	4.061	4.1216
metab_13020	9,10,13-TriHOME	C18H34O5	6.3766	Fatty Acyls	7.6321	7.6849	7.695	7.861	7.82	7.85	7.6484	7.6246	7.7322	7.6946	7.7791	7.6856	7.5297	7.6692	7.641	7.432	7.5948	7.5209
metab_13030	Tragopogonsaponin L	C50H74O15	6.3629	Prenol lipids	6.3871	6.4918	6.4638	6.5751	6.7587	6.6424	6.1652	6.6235	5.6519	6.0632	6.5239	6.3142	6.4963	6.3905	6.47	6.2747	6.0723	6.2908
metab_13032	Soyasaponin III	C42H68O14	6.3629	Prenol lipids	4.7855	4.9966	4.8796	5.0107	5.2264	5.0552	3.9889	5.5999	3.5996	3.5678	5.3366	4.0422	3.86	4.6504	4.2466	3.5053	4.0709	4.7778
metab_13035	DEOXYSAPPANONE B 7,3'-DIMETHYL ETHER	C18H18O5	6.3629	-	3.4999	3.6149	3.5617	3.5415	3.4807	3.5411	3.4818	3.4878	3.4918	3.46	3.4706	3.4628	4.3184	4.9547	4.9588	3.3975	3.3975	3.3503
metab_13039	Elatoside E	C46H74O16	6.356	Prenol lipids	5.6771	5.7439	5.7713	5.9013	6.1193	5.9692	5.4223	5.9569	4.3016	5.1512	5.8265	5.4999	5.7689	5.5946	5.7381	5.4682	5.1591	5.4827
metab_13040	1b-Furanoeudesm-4(15)-en-1-ol acetate	C17H22O3	6.356	Prenol lipids	5.6288	5.7165	5.7027	5.8157	6.0903	5.9464	5.2814	5.9602	3.9597	4.8117	5.7822	5.4791	5.7567	5.616	5.6508	5.4893	4.8784	5.3426
metab_13042	Torvoside D	C38H62O13	6.356	Steroids and steroid derivatives	4.6594	4.5053	4.4425	4.1391	4.793	3.787	3.3426	4.6972	4.838	3.3207	4.0026	3.8735	3.3216	3.3124	3.3133	3.2583	3.2583	3.211
metab_13049	PS(15:0/16:1(9Z))	C37H70NO10P	6.3491	Glycerophospholipids	5.0978	5.2023	5.183	4.5394	5.7289	5.0702	4.3033	5.476	3.7936	3.7617	5.1668	4.5367	3.7626	5.2239	3.9089	3.6993	3.6993	4.0771
metab_13053	Enokipodin D	C15H18O4	6.3491	Prenol lipids	4.4195	4.3773	4.3398	3.5046	3.4901	2.9831	4.6161	4.3329	4.5239	5.3956	2.9126	2.9799	4.0604	4.6899	5.3407	4.2847	3.68	2.7924
metab_13068	Vinaginsenoside R1	C44H74O15	6.3348	Prenol lipids	6.2488	6.3083	6.3039	6.338	6.4597	6.6553	6.2286	6.3976	5.3762	5.8129	6.3321	6.031	6.3032	6.1201	6.4006	6.2332	5.9502	6.0458
metab_13086	11-Oxohexadecanoic acid	C16H30O3	6.328	Fatty Acyls	5.3739	5.4294	5.4473	5.5067	5.6163	5.7651	5.4685	5.2706	5.2594	5.5507	5.3119	5.397	5.5549	5.4624	5.509	4.7649	5.0842	5.0261
metab_13095	Corchorifatty acid F	C18H32O5	6.3211	Fatty Acyls	7.4612	7.5077	7.5152	7.8004	7.8272	7.8017	7.524	7.5014	7.5772	7.589	7.543	7.4993	7.4037	7.4901	7.385	7.1592	7.2821	7.0434
metab_13105	2-{2,6-dihydroxy-4-[6-hydroxy-7-(3-methylbut-2-en-1-yl)-1-benzofuran-2-yl]phenyl}-6-(2,4-dihydroxyphenyl)-4-methylcyclohex-3-ene-1-carboxylic acid	C33H32O8	6.3142	-	6.0248	6.0615	6.0592	6.0083	5.5826	5.7755	5.9241	5.8118	5.9169	6.059	5.9882	6.0133	6.3032	6.5353	6.613	5.6532	5.8732	5.6223
metab_13120	MG(0:0/14:1(9Z)/0:0)	C17H32O4	6.3097	Glycerolipids	6.9362	6.8869	6.905	7.0034	7.0776	7.2102	7.0117	6.9794	6.7848	7.0056	6.7477	6.8327	6.9304	6.9821	6.9871	6.2578	6.5711	6.4641
metab_13122	(S)-Pinocembrin	C15H12O4	6.3097	Flavonoids	5.8933	5.8416	5.8623	5.9904	5.0557	5.3536	5.4051	5.2719	5.6024	5.2858	5.4676	5.5071	6.2537	6.4082	6.5963	5.2902	5.245	4.9932
metab_13144	3,5-dihydroxy-2-[(2E)-3-(4-hydroxyphenyl)prop-2-enoyl]cyclohexa-2,5-diene-1,4-dione	C15H10O6	6.296	-	4.0225	4.0402	4.0654	2.9814	2.8095	2.8699	2.9991	3.2	3.9634	3.663	3.9832	4.0716	4.7074	4.4978	4.9464	4.4079	4.0373	3.4036
metab_13145	2,2'-(3-methylcyclohexane-1,1-diyl)diacetic acid	C11H18O4	6.296	-	4.8521	4.8798	4.8437	5.0602	5.1627	5.0735	4.8757	4.8096	4.9405	4.9158	4.8606	4.8592	4.6665	4.8333	4.7688	4.593	4.8233	4.6478
metab_13157	Tetranor 12-HETE	C16H26O3	6.29	Fatty Acyls	4.1265	4.0917	4.1671	4.2854	4.6596	4.6092	4.3411	4.2263	4.152	4.3284	3.6383	4.0746	4.2132	4.1098	3.9391	2.9543	3.3384	2.7139
metab_13191	Valyl-Glutamine	C10H19N3O4	6.2698	Carboxylic acids and derivatives	5.2483	5.2609	5.2526	5.4609	5.4487	5.4332	5.2445	5.1443	5.3855	5.3347	5.2596	5.3597	5.2332	5.2231	5.0333	5.1731	5.084	5.0674
metab_13212	Kudzusaponin SA2	C47H76O19	6.25	Prenol lipids	6.916	6.8933	6.8753	7.0359	7.1209	7.0496	6.7833	7.033	6.1593	6.6425	6.9291	6.6173	6.8197	6.8072	6.9369	6.756	6.7283	6.7288
metab_13221	Azukisaponin I	C42H68O13	6.2431	Prenol lipids	5.5223	5.5924	5.533	5.7121	5.9045	5.7611	5.3896	5.7131	4.8215	5.184	5.6304	5.2499	5.5274	5.5348	5.6271	5.4258	5.4214	5.3613
metab_13222	(3b,16a,20R)-25-Acetoxy-3,16,20,22-tetrahydroxy-5-cucurbiten-11-one 3-glucoside	C38H62O12	6.2431	Steroids and steroid derivatives	6.2677	6.2847	6.2543	6.5468	6.6711	6.3561	5.9579	6.7247	5.9773	5.9012	6.4218	6.0525	5.4919	6.0685	6.005	5.2496	5.594	5.5573
metab_13226	2'-METHOXYFORMONETIN	C17H14O5	6.2431	-	4.2864	4.2116	4.255	3.4885	2.9698	3.0302	3.5078	2.9769	4.1602	4.2009	4.166	3.6483	5.2942	4.6176	5.1471	4.6017	3.7776	3.2192
metab_13232	Hebevinoside XII	C43H70O13	6.2298	Prenol lipids	6.8594	6.9119	6.8659	6.9266	7.2271	7.0498	6.7321	7.066	6.208	6.4611	6.8899	6.6274	6.8452	6.8265	6.9457	6.7442	6.691	6.6815
metab_13234	19-Hydroxy-PGE2	C20H32O6	6.2298	Fatty Acyls	4.7727	4.687	4.7587	5.0245	4.8327	5.0036	4.075	5.182	3.5742	3.8281	5.2626	4.4194	3.7733	4.5463	4.6191	2.9301	3.8252	4.352
metab_13241	4-Pyridoxic acid	C8H9NO4	6.2298	Pyridines and derivatives	4.3844	4.2892	4.3747	4.3133	4.0425	4.1098	4.3705	4.2569	4.4896	4.419	4.3493	4.3923	4.3721	4.4509	4.352	4.6332	4.6175	4.5335
metab_13253	Cynarasaponin J	C47H74O19	6.216	Prenol lipids	5.9981	6.0222	6.0376	6.0898	6.1965	6.0283	5.9474	6.3208	5.1883	5.7944	6.0516	5.794	5.8651	5.9875	5.8558	5.8274	5.7072	5.7686
metab_13265	KOPARIN 2'-METHYL ETHER	C17H14O6	6.216	-	5.7027	5.6941	5.7371	5.7698	5.0475	5.5012	4.6718	4.2124	5.3	6.6163	6.0057	5.6346	5.2395	5.3617	6.4085	5.3629	5.2237	5.824
metab_13268	Licoricesaponin A3	C48H72O21	6.2091	Prenol lipids	6.1489	6.1955	6.2151	6.3482	6.5672	6.2426	5.9514	6.4433	4.4088	5.7211	6.2414	5.9161	6.029	6.0971	6.0319	6.0174	5.8164	5.8012
metab_13270	Polypodosaponin	C39H62O13	6.2091	Steroids and steroid derivatives	6.8698	6.9056	6.9407	7.0288	7.3422	7.0594	6.6077	7.3034	6.3099	6.2152	6.9906	6.4682	6.1266	6.6688	6.6255	4.9027	5.783	6.1381
metab_13275	Tauro-b-muricholic acid	C26H45NO7S	6.2091	Steroids and steroid derivatives	5.7007	5.5171	5.6012	3.4391	3.6447	3.575	4.0567	4.111	3.8968	3.8554	4.1138	3.921	4.2006	3.8217	3.6712	4.059	4.1384	3.8936
metab_13276	6''-O-Acetyldaidzin	C23H22O10	6.2091	-	6.1596	6.2409	6.2509	5.888	6.1642	6.1617	6.6072	6.784	6.5921	5.9337	5.9678	6.3278	6.3215	6.2836	6.2654	6.162	6.2066	6.1545
metab_13299	Asiaticoside B	C48H78O20	6.1889	Prenol lipids	5.7463	5.6269	5.6063	5.8427	5.6323	5.4231	5.5478	5.1809	5.3418	5.9585	5.9071	5.8918	5.6437	5.459	5.5978	5.5561	5.5655	6.0408
metab_13307	3,4,5-trihydroxy-6-{4-[(E)-2-{2,3,5-trihydroxy-4-[(1E)-3-methylbut-1-en-1-yl]phenyl}ethenyl]phenoxy}oxane-2-carboxylic acid	C25H28O10	6.1889	-	4.0662	4.0712	4.0136	3.0792	3.0185	3.0789	3.0197	3.0256	3.6958	3.2183	3.7277	3.0007	3.5516	4.5974	5.1071	3.9219	2.9354	2.8882
metab_13308	(-)-Usnic acid	C18H16O7	6.1889	-	4.2906	4.1542	4.283	4.3848	3.4035	4.9528	3.6411	3.1713	2.8648	4.8253	4.5221	3.7109	3.5565	3.2243	5.3551	2.7893	2.7706	3.2905
metab_13344	Beta-Damascenone	C13H18O	6.1744	Organooxygen compounds	3.8584	3.8435	3.9499	4.1342	4.2852	4.1059	4.0959	3.7723	4.0144	4.013	3.6652	3.6922	3.6361	3.895	3.6683	3.2691	3.6082	3.6666
metab_13373	Undecanoic acid	C11H22O2	6.1585	Fatty Acyls	4.4381	4.4785	4.5285	4.8721	4.4812	4.6755	4.6821	4.6146	4.5064	4.6312	4.5331	4.4316	4.2232	4.3832	4.3351	4.2271	4.5439	4.3357
metab_13410	Anonaine	C17H15NO2	6.1317	Aporphines	4.3459	4.401	4.3451	4.2068	3.8312	4.1355	4.3144	4.2561	4.4282	4.1867	4.1282	4.1475	4.5776	4.7567	4.5273	3.961	4.0721	4.5157
metab_13432	Ethyl 7-epi-12-hydroxyjasmonate glucoside	C20H32O9	6.1248	Fatty Acyls	4.9218	4.9024	4.8536	5.1135	5.0328	5.0025	4.6594	4.9565	4.8773	5.1266	5.0872	4.9068	5.1651	4.8061	5.1674	4.844	4.6523	4.7642
metab_13470	2-Propenyl 2,4-hexadienoate	C9H12O2	6.097	Fatty Acyls	4.7628	4.8161	4.8014	4.2139	3.6989	3.3899	4.736	4.8776	3.6768	4.4987	4.1668	3.9105	5.5294	5.1896	4.847	3.5011	3.9222	3.4148
metab_13489	(+/-)Abscisic Acid	C15H20O4	6.0814	-	5.1072	5.1306	5.1356	4.4001	4.7112	4.1814	5.0877	4.7933	4.8714	5.2086	5.5126	5.4129	4.5643	4.3243	4.724	5.2768	5.1954	5.3954
metab_13523	(S)-Spinacine	C7H9N3O2	6.0525	Carboxylic acids and derivatives	5.3426	5.3671	5.3804	4.7225	4.2334	4.4919	5.561	5.1147	4.7965	4.152	4.7759	5.2152	5.6627	5.8193	5.3856	4.2785	4.394	4.4635
metab_13559	Notoginsenoside J	C42H74O16	6.0127	Coumarins and derivatives	6.3603	6.4022	6.3661	6.3937	6.8017	6.3612	6.3817	6.5285	5.4176	5.9618	6.5898	6.2896	6.2707	6.2785	6.1666	5.9355	6.0557	6.0799
metab_13565	2-n-Propyl-4-oxopentanoic acid	C8H14O3	6.0092	Keto acids and derivatives	5.7588	5.8229	5.8461	6.0062	5.6204	6.1564	5.667	5.1077	5.1259	4.3665	4.6171	5.2745	5.1908	4.9716	5.9149	5.1906	4.9962	5.6011
metab_13574	Polyethylene, oxidized	C12H20O5	5.9981	Keto acids and derivatives	5.2749	5.3347	5.3336	5.6037	5.6705	5.52	5.352	5.3573	5.5051	5.2644	5.2376	5.2612	5.0548	5.2381	5.289	4.9197	5.087	5.0982
metab_13585	Phenylalanyl-Lysine	C15H23N3O3	5.9846	Carboxylic acids and derivatives	4.2078	4.1586	4.2165	4.7434	4.7027	4.5658	4.318	4.0999	4.5908	4.5486	3.8039	4.1878	3.3309	3.7094	4.1181	2.3912	3.4976	3.4563
metab_13601	(S)-9-Hydroxy-10-undecenoic acid	C11H20O3	5.9637	Hydroxy acids and derivatives	5.3523	5.4145	5.4097	5.4278	5.5521	5.5009	5.3247	5.2181	5.289	5.4775	5.5811	5.5002	5.1302	5.2802	5.2828	5.3761	5.4482	5.404
metab_13654	2-Hydroxyundecanoate	C11H22O3	5.898	Fatty Acyls	4.7374	4.7494	4.7308	4.767	4.7847	4.6018	4.3618	4.7958	4.6896	4.2475	4.3725	4.4479	4.8476	4.6903	5.009	4.9425	4.8788	4.7872
metab_13665	Citronellyl beta-sophoroside	C22H40O11	5.8812	Prenol lipids	5.4497	5.4991	5.481	5.7966	5.7291	5.7431	5.3463	5.6014	5.6332	5.4801	5.3466	5.4796	5.3398	5.4024	5.4107	5.1501	5.2348	5.3858
metab_13671	6-[4-(3-{3-[(3,3-dimethyloxiran-2-yl)methyl]-2,4,6-trihydroxyphenyl}-3-oxopropyl)-3-hydroxyphenoxy]-3,4,5-trihydroxyoxane-2-carboxylic acid	C26H30O13	5.8778	-	4.5912	4.5591	4.5296	4.6045	4.4879	4.5933	5.0056	5.4233	4.8588	4.4078	4.5115	4.6498	3.8969	4.4919	4.3162	4.3324	4.1713	3.533
metab_13674	Shikimic acid	C7H10O5	5.8778	Organooxygen compounds	4.4854	4.4984	4.5355	4.3427	3.9406	3.8367	3.7252	4.1442	4.2797	4.5261	4.3562	4.0989	4.9519	4.8696	5.2786	4.2581	4.3697	3.9395
metab_13677	Cucurbic acid	C12H20O3	5.8727	Fatty Acyls	4.1442	4.1436	4.1722	4.3608	4.3978	4.4646	3.7649	3.8943	4.1641	4.1807	4.2454	4.2391	4.1893	4.0954	4.2139	3.7403	3.64	3.6364
metab_13718	Menthyl ethylene glycol carbonate	C13H24O4	5.7979	Prenol lipids	4.8279	4.8842	4.8963	4.9022	5.2347	5.3586	4.9225	4.7843	5.0131	4.6728	4.7355	4.8237	4.9683	4.7763	4.8742	4.4064	4.3971	4.7667
metab_13748	3,4,5-trihydroxy-6-{[4-(7-methoxy-2-oxo-2H-chromen-6-yl)-2-oxobut-3-en-1-yl]oxy}oxane-2-carboxylic acid	C20H20O11	5.7318	-	5.546	5.4554	5.4024	5.4667	5.226	5.5463	5.7623	6.2436	4.8851	4.5541	5.7317	5.3064	5.2377	5.3239	5.5062	4.7677	4.8663	4.9161
metab_13750	Methyl 5-(1-Propynyl)-2-thiophenepropanoate	C11H12O2S	5.7318	Fatty Acyls	5.5989	5.5662	5.5258	5.5167	5.3452	5.731	5.4564	5.3967	5.4357	5.4259	5.5496	5.5767	5.7257	5.743	5.7338	5.4169	5.3941	5.4296
metab_13784	3,4-Dihydroxymandelaldehyde	C8H8O4	5.6767	Benzene and substituted derivatives	4.2484	4.3396	4.3803	4.477	4.1088	4.1775	4.1017	4.0468	4.1578	4.4408	4.4071	4.2591	4.2775	4.5311	4.9604	4.1446	4.2327	4.1515
metab_13873	Aflatoxin B1	C17H12O6	5.4861	Coumarins and derivatives	4.6702	4.6747	4.6987	4.6885	4.4375	4.5874	4.5873	4.4511	4.5118	4.635	4.6224	4.789	4.6799	4.7227	4.6868	4.273	4.4878	4.522
metab_13874	Pelargonidin	C15H10O5	5.4861	Flavonoids	6.0493	6.0398	6.0611	6.0691	5.8433	5.9952	5.9645	5.8539	5.8949	6.0244	6.0025	6.1308	5.998	6.0677	6.0333	5.7099	5.839	5.8674
metab_13890	Diosmetin	C16H12O6	5.4621	Flavonoids	5.9148	5.8945	5.9204	5.9124	5.4517	5.8448	5.8094	5.7194	5.695	5.5744	5.7821	5.8697	6.0528	6.1757	6.2174	5.5632	5.3119	5.4606
metab_13903	Pyridinoline	C18H28N4O8	5.4309	Carboxylic acids and derivatives	4.8054	4.7204	4.7433	4.9443	4.2229	5.0274	4.6608	3.9596	4.6563	4.587	4.6134	4.0655	5.0775	5.3373	4.9864	4.1165	4.1797	4.2319
metab_13908	MUCRONULATOL((+/-))	C17H18O5	5.4268	-	4.4011	4.3726	4.3806	4.5491	3.8496	4.6294	4.3125	3.6836	4.2943	4.2535	4.2518	3.8214	4.6891	4.9138	4.6214	3.819	3.7966	3.8903
metab_13930	9-Oxo-nonanoic acid	C9H16O3	5.3818	Fatty Acyls	4.9676	5.0287	5.0835	5.5977	5.3141	5.1825	4.9193	5.049	4.9723	5.0334	4.7684	4.8455	4.865	5.0073	5.005	4.7117	4.8347	4.7904
metab_13995	8-(1,2-dihydroxypropan-2-yl)-5-hydroxy-4-propyl-2H,8H,9H-furo[2,3-h]chromen-2-one	C17H20O6	5.2312	-	5.4494	5.4152	5.41	3.8026	3.9048	3.2527	4.0072	3.3469	5.3991	5.0086	5.1292	4.768	5.9328	6.0709	4.4777	5.7895	6.3565	3.75
metab_14001	5-hydroxy-8-(2-hydroxypropan-2-yl)-4-propyl-2H,8H,9H-furo[2,3-h]chromen-2-one	C17H20O5	5.2123	-	4.667	4.6217	4.6297	4.6554	4.4289	4.9787	4.9098	4.8537	4.7131	4.8375	4.8973	4.4419	4.3054	4.5523	4.5721	4.3346	4.5125	4.2142
metab_14006	Marasmal	C15H20O6	5.2045	Naphthofurans	5.2577	5.2166	5.2241	5.7761	5.233	5.4543	4.2552	5.2516	4.7462	4.7711	5.2566	5.2017	5.2976	5.3211	5.3469	5.06	5.0693	4.7113
metab_14007	7-hydroxy-6-(hydroxymethyl)-2H-chromen-2-one	C10H8O4	5.2045	-	5.8819	5.9388	5.9784	6.0317	6.0074	6.2294	5.7945	5.9704	6.0453	6.0225	5.9515	5.7515	6.0884	5.9539	6.2583	5.6228	5.5789	5.6769
metab_14014	12-Hydroxydodecanoic acid	C12H24O3	5.1869	Hydroxy acids and derivatives	4.6349	4.629	4.6338	4.9121	4.8234	4.9881	4.1875	4.451	4.5378	4.6863	4.8218	4.6476	4.548	4.597	4.5881	4.2372	4.2771	4.146
metab_14026	4-hydroxy Nonenal Glutathione	C19H33N3O8S	5.1516	Carboxylic acids and derivatives	4.9558	4.9421	4.9696	5.1551	5.1186	5.1622	4.4761	4.7655	5.0684	4.86	4.6786	4.6311	4.6796	4.7931	4.9456	4.6316	4.885	4.9241
metab_14047	Coumestrol	C15H8O5	5.1152	Isoflavonoids	4.906	4.7977	4.8088	4.9005	4.5903	4.9146	4.6683	4.5066	4.738	4.7536	4.7977	4.7017	5.0069	4.8967	5.012	4.7022	4.6833	4.6662
metab_14049	2-HYDROXYXANTHONE	C13H8O3	5.1152	Benzopyrans	4.8694	4.8099	4.7844	4.9158	4.5568	4.9082	4.5935	4.4283	4.7219	4.7021	4.7762	4.6744	5.0032	4.8842	4.9984	4.6713	4.5734	4.6053
metab_14058	6-(1-benzofuran-4-yloxy)-3,4,5-trihydroxyoxane-2-carboxylic acid	C14H14O8	5.0968	-	4.2571	4.1669	4.249	4.0211	4.2257	4.4859	3.8823	2.5396	3.0426	2.5119	2.6391	4.8102	2.5127	2.5036	2.5045	4.3837	4.3496	4.1844
metab_14061	Didymin	C28H34O14	5.0718	Flavonoids	5.2681	5.204	5.1472	5.3351	5.237	5.3539	5.3595	5.2578	5.3087	5.1698	5.5115	5.1927	4.7808	4.8894	5.0716	4.938	5.0547	5.1118
metab_14080	3,4,5-trihydroxy-6-{4-[3-oxo-3-(2,4,6-trihydroxyphenyl)propyl]phenoxy}oxane-2-carboxylic acid	C21H22O11	5.0389	-	4.9129	4.8361	4.8075	4.3439	4.6204	4.8005	4.6056	4.3928	5.4042	4.7857	5.1135	4.7859	4.6935	4.7351	4.7362	5.2002	4.9631	5.1851
metab_14082	2-(3-methoxyphenyl)-3,4-dihydro-2H-1-benzopyran-3,5,7-triol	C16H16O5	5.0389	-	4.7776	4.7209	4.694	4.4647	4.5866	4.656	4.6667	4.5599	4.2344	4.843	4.8799	4.5825	4.9592	4.7737	4.752	4.0893	4.1536	4.3976
metab_14086	Undecanedioic acid	C11H20O4	5.0319	Fatty Acyls	4.3324	4.384	4.3937	4.8327	4.7764	4.8412	4.5272	4.3404	4.3187	4.5591	3.8051	4.2342	3.9806	4.4114	4.4495	4.0617	4.011	3.7977
metab_14132	Musabalbisiane A	C23H28O12	4.9481	Prenol lipids	5.2747	5.3034	5.2944	5.393	5.0038	5.1466	5.128	5.1254	4.8744	5.302	5.1023	5.3186	5.7924	5.3983	5.3502	4.761	5.0376	4.7838
metab_14142	Enterolactone	C18H18O4	4.9269	Furanoid lignans	4.6101	4.5907	4.568	4.2671	4.0228	4.4342	4.4801	4.2645	4.2366	4.41	4.4794	4.8641	4.8126	4.4923	4.7567	5.0646	4.4136	4.5499
metab_14144	Sucrose 1',4'-(4,4'-dihydroxy-3,3'-dimethoxy-b-truxinate)	C32H38O17	4.9217	-	5.4008	5.2579	5.2335	5.5726	5.678	5.5774	5.1122	5.3105	5.6824	4.9903	5.2425	5.4144	4.963	5.2826	5.1522	5.3006	4.8867	5.0416
metab_14204	(+/-)-2'-Hydroxydihydrodaidzein	C15H12O5	4.8098	-	4.137	4.2008	4.2267	4.312	3.6995	3.4843	3.1901	3.6666	3.8249	4.425	3.9655	3.858	4.5077	4.649	4.9796	3.5417	3.8864	3.602
metab_14239	Vulgaxanthin I	C14H17N3O7	4.7367	Carboxylic acids and derivatives	5.3773	5.2475	5.1779	5.124	4.8144	5.2898	5.1177	5.7406	4.6321	5.2487	5.1786	5.3668	5.2968	5.0159	5.4886	5.0591	5.0072	4.7338
metab_14240	(2R)-6,8-Diglucopyranosyl-4',5,7-trihydroxyflavanone	C27H32O15	4.7367	-	5.6292	5.5381	5.4992	5.7169	5.7216	5.5906	5.2424	5.5166	5.2332	5.5527	5.303	4.9909	5.6694	5.3615	5.559	5.0718	5.405	4.7094
metab_14285	6-(3,4-Methylenedioxyphenyl)-3,5-hexadien-2-one	C13H12O3	4.6225	Benzodioxoles	3.5504	3.6157	3.7262	1.6948	1.6353	1.6945	1.6365	1.6423	3.3968	1.6151	1.6254	1.6179	4.506	4.9414	4.3787	1.5543	3.3959	1.5084
metab_14297	6-[(E)-2-(3,4-dihydroxyphenyl)ethenyl]-4-methoxy-2H-pyran-2-one	C14H12O5	4.5953	-	4.4372	4.4689	4.487	4.4679	3.9153	4.1426	3.0832	3.1989	4.2229	4.8898	4.5507	4.3983	4.6621	5.0879	4.9718	3.9385	4.3356	3.6484
metab_14307	Glucoobtusifolin	C22H22O10	4.5669	Anthracenes	6.3252	6.2445	6.2141	6.2426	5.9548	6.3799	5.9701	5.807	6.0742	6.116	6.2494	6.2022	6.4493	6.3708	6.435	6.1775	6.0609	6.1532
metab_14357	2'-(E)-Feruloyl-3-(arabinosylxylose)	C20H26O12	4.4588	-	5.3743	5.3033	5.3094	5.164	4.9994	5.6619	5.3958	5.3372	5.5904	5.0814	5.5024	5.5313	5.2564	5.2272	4.9284	5.2151	5.1235	5.0385
metab_14372	Rosuvastatin 5 S-lactone	C22H26FN3O5S	4.4249	Diazines	5.6949	5.7813	5.805	5.8985	5.7116	5.8082	5.6246	5.4831	5.3884	5.7624	5.8527	5.8035	6.0237	5.826	5.9758	5.3054	5.1101	5.4165
metab_14374	Phloridzin	C21H24O10	4.4202	Flavonoids	5.8659	5.7975	5.8102	5.8932	5.7204	5.7968	5.664	5.5125	5.3824	5.8463	5.8977	5.8156	6.0271	5.7908	5.9641	5.2739	5.1511	5.4196
metab_14380	Taraxacoside	C18H22O10	4.3961	Organooxygen compounds	4.7675	4.6651	4.6544	4.4863	4.4727	4.2714	4.9408	4.8179	4.9106	4.8309	4.5673	4.9921	4.4628	4.3435	4.3316	4.725	4.5821	4.5414
metab_14399	12-Oxo-20-trihydroxy-leukotriene B4	C20H30O7	4.362	Fatty Acyls	4.9487	4.9112	4.8557	4.8951	4.8161	5.0288	5.0266	5.0553	4.7591	4.8057	4.3401	5.048	4.6602	4.5902	4.5669	4.9945	4.7947	4.7307
metab_14425	Apigenin 7-O-glucoside	C21H20O10	4.3089	Flavonoids	5.6748	5.5603	5.5197	5.4916	5.5374	5.7675	5.4176	5.2413	5.7035	5.5678	5.2371	5.5023	5.5426	5.7507	5.5141	5.1514	5.2027	5.1875
metab_14428	Liqcoumarin	C12H10O4	4.2962	Coumarins and derivatives	4.6189	4.7771	4.7682	4.8508	4.8128	4.7992	4.3443	4.6483	4.7224	4.9181	4.8145	4.8398	5.0714	5.0003	4.8524	4.5809	4.65	4.1354
metab_14446	Osmaronin	C11H17NO6	4.2659	Fatty Acyls	4.7213	4.8244	4.8345	4.7914	4.6045	4.7237	4.5405	4.7981	4.5654	4.8159	4.9895	4.9018	4.8854	4.8943	4.8417	4.7704	4.7134	4.3001
metab_14478	Isopropyl beta-D-glucoside	C9H18O6	4.2102	Organooxygen compounds	5.096	5.2895	5.3101	4.9731	5.3411	5.3558	5.3863	5.2497	5.3988	5.3532	5.4988	5.2704	5.1694	4.9551	5.0869	5.0816	4.9036	5.3705
metab_14482	Plantaginin	C21H20O11	4.1994	-	4.8632	4.7526	4.69	4.8144	4.549	5.0291	4.3964	4.171	5.0463	4.6769	4.3674	4.65	4.6825	4.9094	4.6683	4.265	4.1853	4.4074
metab_14499	1-Hydroxy-3-methoxy-7-primeverosyloxyxanthone	C25H28O14	4.1597	Benzopyrans	6.0174	5.9123	5.8769	5.7383	5.7993	5.6971	5.7986	5.6736	5.927	5.9918	5.9779	6.0702	5.9944	5.6907	5.8833	5.6619	5.7654	5.6865
metab_14502	2-Methyl-4-pentenoic acid	C6H10O2	4.156	Fatty Acyls	4.4176	4.4143	4.3715	4.5288	4.8389	4.654	4.8643	4.7832	4.3732	4.3236	4.44	4.3049	4.1498	4.1248	4.5146	4.1633	4.0339	4.0398
metab_14504	3,4,5-trihydroxy-6-[1-(4-methoxy-1-benzofuran-5-yl)ethoxy]oxane-2-carboxylic acid	C17H20O9	4.1521	-	5.8154	5.7414	5.7182	5.9386	5.7399	6.013	5.8086	5.8584	5.6167	5.7795	5.6112	5.5726	5.7383	5.7863	5.5458	5.2887	5.5569	5.2309
metab_14509	6-O-Oleuropeoylsucrose	C22H36O13	4.1299	Saccharolipids	4.8862	4.8156	4.7668	4.4819	4.8428	4.7615	4.3309	4.8703	4.9658	5.0019	5.0133	4.8755	4.6847	4.3722	4.4917	4.5512	4.3071	4.4565
metab_14520	3,3-Dimethylglutaric acid	C7H12O4	4.1108	Fatty Acyls	4.5893	4.602	4.6275	5.0074	4.9868	5.2427	4.4454	4.5134	4.4614	4.4981	4.5163	4.2869	4.601	4.5712	4.5035	4.4736	4.2419	4.3118
metab_14523	Gamma-Glutamyltryptophan	C16H19N3O5	4.1067	Carboxylic acids and derivatives	5.5937	5.4882	5.4908	5.629	5.1989	5.4177	5.4062	5.3726	5.3976	5.6525	5.6254	5.5714	5.5331	5.7561	5.4187	5.4091	5.7645	5.1832
metab_14563	M-Coumaric acid	C9H8O3	4.0066	Cinnamic acids and derivatives	4.933	4.9459	4.9556	5.0517	4.9625	5.1157	5.0009	4.9117	4.8814	4.8797	5.029	4.878	4.9908	4.9188	4.9133	4.688	4.6314	4.6674
metab_14571	3-Methyladipic acid	C7H12O4	3.9996	Fatty Acyls	5.1504	5.1835	5.1923	5.5766	5.4095	5.3261	5.5446	5.2911	5.0687	5.1743	5.2629	5.0806	5.0533	5.2091	4.9993	5.1863	5.0037	4.8617
metab_14574	5-[2-(3-hydroxyphenyl)ethyl]benzene-1,3-diol	C14H14O3	3.9885	-	4.9755	4.9363	4.9468	5.0436	4.7003	5.1807	4.7849	4.4989	4.8412	5.0054	4.9227	4.7936	5.0776	5.0237	5.1912	4.584	4.5852	4.7413
metab_14575	6-{3,5-dihydroxy-2-[3-(3-hydroxyphenyl)propanoyl]-6-[3,4,5-trihydroxy-6-(hydroxymethyl)oxan-2-yl]phenoxy}-3,4,5-trihydroxyoxane-2-carboxylic acid	C27H32O16	3.985	-	4.9647	4.804	4.7921	4.361	4.603	4.802	4.6347	4.4931	5.4776	4.6259	4.9878	4.6547	4.5231	4.924	4.671	5.2754	4.9198	5.1515
metab_14596	Isoleucyl-Leucine	C12H24N2O3	3.9376	Carboxylic acids and derivatives	4.7362	4.7108	4.7303	5.3239	5.1047	5.0928	5.0401	4.9736	4.919	4.5845	4.33	4.467	4.2073	4.35	4.0234	4.1731	4.1559	3.9768
metab_14611	Isoscopoletin	C10H8O4	3.9133	-	3.812	3.795	3.872	3.6611	3.1052	3.1411	2.9615	3.681	3.7507	3.7136	3.7775	3.9696	4.5732	3.9087	3.8826	3.4882	3.473	3.2798
metab_14638	Sonchuionoside C	C19H30O8	3.858	Prenol lipids	4.6111	4.7741	4.8117	5.1677	5.1313	5.2501	4.9693	4.7557	4.8301	5.0429	4.5473	4.6658	4.7109	4.6989	4.9311	3.2648	3.9205	3.891
metab_14694	Corchoionoside B	C19H28O9	3.7592	Fatty Acyls	4.7681	4.7328	4.7389	4.9107	4.6274	4.8006	4.7595	4.8142	4.7679	4.7032	5.0215	4.4784	4.4722	4.6025	4.6165	4.9148	4.9807	4.2627
metab_14749	Musabalbisiane B	C23H30O12	3.6305	Prenol lipids	5.4994	5.4442	5.4176	5.2492	5.0709	5.6402	5.4124	5.3297	5.3954	5.0828	5.0838	5.2458	5.7078	5.6746	5.4544	5.0696	5.1671	5.4207
metab_14776	Deoxyinosine	C10H12N4O4	3.564	Purine nucleosides	4.09	4.0477	4.0776	3.9224	3.7028	3.965	4.1208	3.7809	3.9463	3.777	4.0106	3.6953	4.1048	3.6611	3.8026	3.0813	2.6962	3.3346
metab_14804	(3,4,5,6-tetrahydroxyoxan-2-yl)methyl 4-hydroxybenzoate	C13H16O8	3.4956	-	6.0373	6.0112	6.0139	5.6827	6.1155	5.9123	5.6199	5.7374	6.2099	6.1056	6.2167	6.3462	5.9496	5.8127	5.634	5.5569	5.819	5.7375
metab_14807	Pantetheine	C11H22N2O4S	3.4915	Carboxylic acids and derivatives	4.2057	4.2748	4.2185	4.3119	3.8195	4.3174	4.3024	4.6836	4.7401	3.725	4.1518	4.2941	4.1924	4.3586	4.3301	3.79	3.8691	3.7747
metab_14826	4-Hydroxy-4-(3-pyridyl)-butanoic acid	C9H11NO3	3.4522	Pyridines and derivatives	3.7309	3.7903	3.8376	2.4838	2.7356	2.6305	0.4689	2.511	0.4755	3.3802	2.3021	3.1097	4.0579	4.7106	4.29	2.2901	2.6539	2.1702
metab_14841	Phytosulfokine a	C33H46N6O16S2	3.4311	Carboxylic acids and derivatives	5.2998	5.2626	5.2634	5.0715	4.9604	5.1424	4.6922	5.2305	4.9637	5.3497	5.3168	5.3781	5.385	4.5653	5.3622	4.7204	5.0835	5.202
metab_14845	(+/-)-3-Hydroxynonanoic acid	C9H18O3	3.4218	Hydroxy acids and derivatives	4.0474	4.0737	4.1171	4.8949	4.2863	4.4235	3.81	4.3075	3.8219	3.4673	3.6358	3.1327	4.1629	3.9249	4.0572	3.9626	3.9268	3.6237
metab_14907	1-(3-Methylbutanoyl)-6-apiosylglucose	C16H28O11	3.3271	Fatty Acyls	4.8387	4.847	4.7934	4.8698	5.0439	4.5737	4.0418	4.4284	4.3512	4.2302	4.445	4.3003	5.0401	3.977	4.2476	4.0768	4.2848	3.7673
metab_14919	Threoninyl-Phenylalanine	C13H18N2O4	3.3078	Carboxylic acids and derivatives	4.7648	4.7771	4.7803	5.2723	5.1604	5.0927	5.0525	4.9397	4.9446	4.8159	4.6052	4.6686	4.2512	4.6128	4.3306	4.4151	4.4389	4.1409
metab_14920	Hydroxysafflor yellow A	C27H32O16	3.3043	Cinnamic acids and derivatives	4.9833	4.9923	4.97	5.1759	4.9497	4.7998	4.5389	4.7954	4.9034	4.3167	4.6866	4.6444	4.9904	5.1676	4.9924	4.6218	4.4875	4.6208
metab_14937	Endalin	C9H12FN3O3	3.2853	Pyrimidine nucleosides	4.4386	4.454	4.4656	4.718	4.28	4.6207	4.1628	4.6775	4.6356	4.9783	4.262	4.5412	3.7042	4.1218	4.1172	4.3816	4.7845	4.0662
metab_14997	Asparaginyl-Phenylalanine	C13H17N3O4	3.2027	Carboxylic acids and derivatives	4.5361	4.5504	4.563	4.9231	4.8712	4.769	4.8711	4.7761	4.73	4.5798	4.3558	4.4335	4.0803	4.3461	4.3328	4.1106	4.2514	3.9557
metab_15004	Serylphenylalanine	C12H16N2O4	3.1905	Carboxylic acids and derivatives	4.8458	4.8472	4.8686	5.2688	5.1612	5.0547	5.1461	5.0433	5.0283	4.8916	4.6749	4.7315	4.453	4.661	4.4977	4.5191	4.5856	4.311
metab_15068	4-Hydroxycyclohexylcarboxylic acid	C7H12O3	3.0698	Organooxygen compounds	5.2437	5.2688	5.2823	5.2786	5.4703	5.323	5.434	5.3199	5.4911	5.248	5.2803	5.316	5.2829	5.2334	5.0973	5.1509	5.1592	5.1073
metab_15073	Threoninyl-Isoleucine	C10H20N2O4	3.062	Carboxylic acids and derivatives	4.9004	4.8977	4.896	5.2577	5.2517	5.1556	5.2074	5.1035	5.0386	4.9078	4.7825	4.8027	4.5447	4.7869	4.7258	4.544	4.5947	4.3777
metab_15100	Bicine	C6H13NO4	3.0208	Carboxylic acids and derivatives	5.1642	5.2442	5.2438	5.213	5.1798	5.2773	5.5637	5.3908	5.2862	5.3547	5.3228	5.2534	5.1349	5.2797	5.2914	5.2104	5.122	4.935
metab_15107	Hydroxyprolyl-Lysine	C11H21N3O4	3.0137	Carboxylic acids and derivatives	4.7733	4.8419	4.8415	5.2232	5.1703	5.0466	5.2273	5.0762	5.0526	4.7552	4.6772	4.7118	4.4214	4.6391	4.6746	4.4453	4.5077	4.2258
metab_15118	Asparaginyl-Isoleucine	C10H19N3O4	2.9924	Carboxylic acids and derivatives	4.8112	4.8346	4.8284	5.2204	5.165	5.0288	5.1767	5.0535	5.0234	4.8839	4.7082	4.7849	4.5355	4.7062	4.7131	4.4663	4.5649	4.3063
metab_15123	Tetrahydrofurfuryl acetate	C7H12O3	2.988	Tetrahydrofurans	4.2755	4.3789	4.3929	4.2432	4.5224	4.3271	4.56	4.5175	4.4278	4.7255	4.5876	4.5401	4.3368	4.3252	4.2205	4.2393	4.1873	4.3883
metab_15136	Glycylleucine	C8H16N2O3	2.9661	Carboxylic acids and derivatives	4.8353	4.8431	4.8748	5.1503	5.0811	5.0433	5.0226	4.9339	4.9098	4.9336	4.8816	4.8138	4.6507	4.8476	4.7576	4.6234	4.7826	4.6826
metab_15139	3,4,5-trihydroxy-6-(3-methoxyphenoxy)oxane-2-carboxylic acid	C13H16O8	2.9562	-	5.0437	5.0524	5.109	4.3931	4.5592	5.3236	4.3844	3.7921	4.4077	4.9529	4.7336	4.6179	4.8921	6.1766	4.8313	4.4645	4.4247	4.4759
metab_15184	Serylisoleucine	C9H18N2O4	2.8843	Carboxylic acids and derivatives	4.8338	4.8814	4.8652	5.0995	5.043	5.036	5.0454	4.9146	4.9348	4.8888	4.8964	4.8275	4.6644	4.7958	4.7481	4.625	4.7687	4.6946
metab_15190	Levoglucosan	C6H10O5	2.8687	Oxepanes	4.0394	4.0786	4.1407	4.004	3.9327	4.0369	4.3767	4.4248	4.0385	4.2364	4.1651	3.8231	4.5921	4.2363	4.1028	2.8157	3.1298	3.8651
metab_15197	(+/-)-Glycerol 1,2-diacetate	C7H12O5	2.8549	Glycerolipids	4.9422	4.8969	4.925	5.2014	5.0036	5.0608	4.9258	4.6065	4.8914	4.5109	4.7006	4.7567	5.5531	4.8413	4.6499	4.4977	4.5119	4.7193
metab_15198	Gamma-Glutamylphenylalanine	C14H18N2O5	2.8549	Carboxylic acids and derivatives	4.5735	4.5426	4.5821	5.0443	4.9048	4.9288	4.865	4.6915	4.7427	4.6228	4.4937	4.4454	4.315	4.4788	4.2532	4.2849	4.3024	4.4149
metab_15210	3,3'-Thiobispropanoic acid	C6H10O4S	2.848	-	4.7149	4.7848	4.7573	4.8285	4.3689	4.7143	4.8912	4.4699	4.7969	4.505	4.8039	4.7941	4.7999	4.4628	4.6263	3.9046	3.5042	4.3668
metab_15221	(3,4,5,6-tetrahydroxyoxan-2-yl)methyl (2E)-3-(3,4-dihydroxyphenyl)prop-2-enoate	C15H18O9	2.8411	-	4.655	4.6231	4.6138	3.8911	4.3372	4.6986	2.4102	2.416	2.4201	4.3884	4.6668	2.3912	4.9189	2.38	3.5668	4.0597	3.9174	2.2791
metab_15229	Tyrosyl-Glycine	C11H14N2O4	2.8411	Carboxylic acids and derivatives	3.9455	3.955	3.9282	1.5744	1.6939	2.0796	2.019	1.4517	1.4556	1.4249	1.4351	3.8706	4.2837	4.9353	4.2979	1.3649	2.0094	1.3198
metab_15291	L-Leucyl-L-Alanine	C9H18N2O3	2.8118	Carboxylic acids and derivatives	4.1549	4.1847	4.2067	4.7429	4.5303	4.5687	4.5227	4.3789	4.3735	4.064	3.999	3.9367	3.9852	3.8973	3.7563	3.9833	3.8803	3.7809
metab_15313	2-Hydroxyestrone sulfate	C18H22O6S	2.7815	Steroids and steroid derivatives	6.3654	6.3518	6.3257	6.4596	6.4362	6.5758	6.5122	6.4917	6.208	6.2874	6.5998	6.2711	6.3458	6.1799	6.4804	6.2407	6.2164	5.9986
metab_15320	Galactose-beta-1,4-xylose	C11H20O10	2.7781	Organooxygen compounds	5.0204	5.0093	5.0075	5.0096	4.6196	4.9085	4.5955	4.6888	4.813	4.9839	4.9151	5.0062	5.2343	5.0037	5.1511	5.4709	5.353	4.7768
metab_15336	6-{[2,4-dihydroxy-2,5-bis(hydroxymethyl)oxolan-3-yl]oxy}-3,4,5-trihydroxyoxane-2-carboxylic acid	C12H20O12	2.7563	-	5.2099	5.2343	5.2523	5.0179	4.326	4.8847	4.6529	4.0742	4.6145	5.3237	5.1878	5.1343	5.5138	5.3491	5.2792	5.7327	5.5598	5.236
metab_15358	Homocarnosine	C10H16N4O3	2.7206	Peptidomimetics	4.9857	4.9571	4.942	3.034	2.3676	2.4278	3.4754	2.8439	3.0897	2.4322	2.6776	4.9373	5.3053	5.8036	5.4693	2.2848	2.3861	2.2378
metab_15366	Galactosylglycerol	C9H18O8	2.712	Glycerolipids	4.7464	4.7107	4.7161	4.8509	4.8828	4.9976	4.5884	4.9772	4.619	4.6386	4.6192	4.593	4.7914	4.8363	4.7068	4.5582	4.4294	4.4456
metab_15368	2-Acetyl-1-ethylpyrrole	C8H11NO	2.7065	Organooxygen compounds	3.9121	3.9087	3.914	2.171	2.1107	2.188	2.5014	2.1177	2.5094	2.184	2.2323	3.8265	4.2797	4.9005	4.3257	2.0282	2.4161	2.8542
metab_15372	Stachyose	C24H42O21	2.698	Organooxygen compounds	6.0639	6.0145	6.0164	5.9423	6.0525	6.272	5.7778	6.1046	6.0277	5.8997	6.135	6.0086	6.0349	5.9191	5.9592	5.7868	5.7636	5.7812
metab_15379	Imidazoleacetic acid ribotide	C10H15N2O9P	2.6855	Purine nucleosides	5.0041	4.9924	4.9993	5.3001	5.2508	5.2585	4.9945	4.8318	4.9854	5.0136	5.1288	4.9662	4.9593	4.6548	4.6382	4.7845	4.9719	4.5892
metab_15383	Etoposide glucuronide	C35H40O19	2.674	Diazines	6.1113	6.0485	6.0364	6.1477	6.1096	6.316	6.1035	6.2388	5.9827	6.0781	6.1386	5.994	5.9329	5.997	6.1399	5.8859	5.8928	5.6417
metab_15388	(2S,3'S)-alpha-Amino-2-carboxy-5-oxo-1-pyrrolidinebutanoic acid	C9H14N2O5	2.669	-	4.4078	4.3958	4.4071	4.6325	4.9776	4.5822	4.2903	4.4232	4.6399	4.5127	4.4783	4.4826	4.2386	4.3511	4.4764	3.6282	4.0748	4.1558
metab_15391	Val-Abu-OH	C14H18N2O6	2.6476	-	4.6298	4.6685	4.7034	4.9737	4.9238	4.9525	4.8281	4.7618	4.7091	4.733	4.6442	4.5995	4.4135	4.6112	4.4711	4.394	4.4783	4.4572
metab_15395	3,4,5-trihydroxy-6-({7,8,15-trihydroxy-16,17-dimethoxy-9-oxotricyclo[12.3.1.1?,?]nonadeca-1(17),2,4,6(19),14(18),15-hexaen-3-yl}oxy)oxane-2-carboxylic acid	C27H32O13	2.6442	-	4.2581	4.3336	4.3837	3.7229	4.1566	3.9872	3.8914	3.8685	3.6656	3.8059	4.155	3.9456	4.1031	4.1398	3.9651	5.4963	4.2731	3.7375
metab_15411	Adenosine 3'-monophosphate	C10H14N5O7P	2.6189	-	5.7781	5.7838	5.7617	6.1265	6.0839	6.1052	5.9574	5.7826	5.9549	5.7347	5.7971	5.7267	5.385	5.5864	5.5966	5.405	5.587	5.3952
metab_15412	Ribose 1-phosphate	C5H11O8P	2.6189	Organooxygen compounds	4.6345	4.6113	4.6272	4.9855	4.9522	4.9586	4.8093	4.6103	4.8128	4.6128	4.6535	4.5637	4.2407	4.4344	4.4622	4.2627	4.4738	4.3123
metab_15424	3-Oxoadipic acid	C6H8O5	2.5658	Keto acids and derivatives	6.075	6.0691	6.0851	5.9746	5.9691	5.8867	5.9975	5.973	6.1146	6.1421	6.185	6.0739	6.3424	6.117	6.15	5.9527	5.9846	6.0323
metab_15427	6-Methylnicotinamide	C8H10N2O	2.5613	Pyridines and derivatives	4.7824	4.7835	4.7616	2.4088	2.3483	2.4085	2.6818	2.3553	2.5905	2.8424	2.3382	4.4375	4.847	5.4942	5.764	2.2655	2.8558	2.5247
metab_15450	N4-Acetylaminobutanal	C6H11NO2	2.4303	Organooxygen compounds	5.2098	5.2193	5.2222	5.309	5.253	5.3128	5.3243	5.2782	5.2056	5.3887	5.3195	5.241	5.1211	5.2616	5.2082	5.0868	5.0912	5.0663
metab_15452	Nicotinamide adenine dinucleotide (NAD)	C21H27N7O14P2	2.3978	-	5.4785	5.5307	5.4876	5.4211	5.5132	5.2575	5.2362	5.0407	5.0235	5.1163	5.3506	5.5152	5.5354	5.4115	5.2707	5.8598	5.5528	5.5954
metab_15453	Adenosine diphosphate ribose	C15H23N5O14P2	2.3898	Purine nucleotides	6.2446	6.2707	6.266	6.1659	6.245	6.0269	6.0143	5.8172	5.8432	5.9217	6.1401	6.2587	6.311	6.1847	6.054	6.5927	6.3085	6.3773
metab_15460	Fructosamine	C6H13NO5	2.3159	Organooxygen compounds	5.234	5.2436	5.2699	5.5091	5.4713	5.4739	5.443	5.3682	5.3538	5.2912	5.239	5.2074	5.036	5.1749	5.2569	4.6607	5.0661	5.0328
metab_15472	Threoninyl-Cysteine	C7H14N2O4S	2.2523	Carboxylic acids and derivatives	6.135	6.1664	6.1712	6.0405	5.8021	6.095	5.6943	5.7867	5.845	5.989	6.3575	6.0845	6.3357	6.3351	6.0037	6.0716	6.202	6.2528
metab_15474	Glycylproline	C7H12N2O3	2.2459	Carboxylic acids and derivatives	5.1985	5.2321	5.2342	5.0251	5.0812	4.7629	5.1756	5.0168	4.8897	4.7994	5.1196	5.9184	5.195	5.24	5.2052	4.7531	4.6873	4.7879
metab_15475	L-glycyl-L-hydroxyproline	C7H12N2O4	2.239	-	5.5646	5.5978	5.6073	5.4694	5.2472	5.5194	5.1327	5.2323	5.2928	5.4347	5.7889	5.5301	5.758	5.7685	5.4543	5.5128	5.6373	5.6814
metab_15480	Ethyl hydrogen fumarate	C6H8O4	2.2146	Fatty Acyls	5.2753	5.2928	5.311	5.1061	5.1966	5.2977	5.2465	5.2731	5.2624	5.4219	5.3823	5.3655	5.278	5.3188	5.4874	5.2958	5.3284	5.354
metab_15488	Ribonolactone	C5H8O5	2.1576	Organooxygen compounds	5.9796	6.0243	6.0361	6.1422	6.1969	6.2481	6.1731	6.0697	6.0763	5.9542	5.8967	6.0711	5.834	5.9788	5.8788	5.9852	6.0384	6.1124
metab_15570	Methionine sulfoxide	C5H11NO3S	1.4593	Carboxylic acids and derivatives	4.5684	4.5983	4.6295	5.1111	4.6369	5.2057	2.7624	4.107	2.9314	3.8043	4.7165	4.3544	4.7768	4.8634	4.495	4.6046	4.2763	4.8672
metab_15574	Hydroxyprolyl-Glutamine	C10H17N3O5	1.4455	Carboxylic acids and derivatives	5.4441	5.4932	5.513	5.306	5.3195	5.3507	4.9883	4.9634	5.2558	5.1624	5.7863	5.5461	5.7253	5.5784	5.371	5.1351	5.2398	5.5892
metab_15579	2-Hydroxyadenine	C5H5N5O	1.4318	Imidazopyrimidines	5.0672	5.121	5.1179	5.5137	5.4164	5.42	5.3532	5.3401	5.2644	5.1645	5.1642	5.0208	4.9118	5.0755	5.1008	4.6356	4.9223	4.8444
metab_15604	Oxoglutaric acid	C5H6O5	1.3155	Keto acids and derivatives	6.1799	6.203	6.2161	6.3368	6.25	6.3163	5.8729	5.8949	5.9818	5.9356	6.3337	6.0378	6.5069	6.4954	6.4243	6.158	6.2712	6.2414
metab_15646	Nicotinamide riboside	C11H15N2O5+	1.0218	Organooxygen compounds	5.1466	5.1102	5.1553	5.2734	5.5842	5.3501	5.2762	5.1714	5.2748	5.2451	5.2039	5.2556	5.1985	5.0129	5.1045	4.7844	4.5883	4.6244
metab_15655	1-Kestose	C18H32O16	1.0081	Organooxygen compounds	7.1245	7.1295	7.1345	6.5627	6.4535	6.7886	6.5733	6.8816	6.7656	6.8877	7.089	7.055	7.3615	7.2758	7.2573	7.5328	7.36	7.4472
metab_15673	Serylvaline	C8H16N2O4	0.9806	Carboxylic acids and derivatives	5.3438	5.3754	5.4077	5.6173	5.5599	5.5812	5.4685	5.4219	5.4682	5.5185	5.3435	5.4243	5.3638	5.3056	5.3463	5.1335	5.0264	4.9569
metab_15674	1-Methylinosine	C11H14N4O5	0.9738	Purine nucleosides	5.7207	5.6667	5.6694	5.5672	5.4279	5.6902	5.6176	5.6544	5.6722	5.6397	5.7586	5.7741	5.8066	5.492	5.6652	5.4742	5.498	5.5519
metab_15685	6-Phosphogluconic acid	C6H13O10P	0.9669	Organooxygen compounds	5.0938	5.0914	4.9579	4.4933	4.8198	4.0634	4.4791	3.5098	4.0954	4.9872	4.0142	5.3317	4.0979	5.1993	3.4745	5.8004	5.9328	5.3834
metab_15686	UDP-glucose	C15H24N2O17P2	0.9601	Pyrimidine nucleotides	5.4762	5.5049	5.3361	3.979	4.7164	3.9787	4.0058	3.9253	4.3508	5.0016	5.645	5.2915	5.2601	5.5177	4.9046	5.9707	5.4998	5.719
metab_15690	6-ethoxy-3,4,5-trihydroxyoxane-2-carboxylic acid	C8H14O7	0.9601	-	5.8483	5.8555	5.8622	5.931	5.9068	5.9825	5.8945	5.8776	5.9097	5.833	5.927	5.9448	5.9199	5.7155	5.9089	5.7042	5.704	5.7097
metab_15710	Erythronic acid	C4H8O5	0.9533	Organooxygen compounds	6.2121	6.2427	6.2443	6.3495	6.4218	6.5358	6.4551	6.4369	6.4426	6.2742	6.1482	6.1727	6.1456	6.3602	6.209	6.0929	6.1445	6.1775
metab_15827	Quebrachidine	C21H24N2O3	0.8093	Corynanthean-type alkaloids	5.0643	5.0827	5.0647	5.0256	4.8544	4.9977	5.1181	5.1416	4.9174	4.5581	5.1535	4.9737	4.8518	5.0159	4.7962	5.3393	5.2854	5.1692
metab_16014	Adenosine monophosphate	C10H14N5O7P	1.4593	Purine nucleotides	5.6936	5.6611	5.6916	5.4035	5.4542	5.2524	5.0124	4.8621	5.3671	5.3533	5.3505	5.6648	5.6937	5.8566	5.3259	6.0653	5.5926	5.6872
metab_16016	Amylose	C2H6.[C12H20O11]n	2.6442	Organooxygen compounds	5.9152	5.9403	5.9332	6.3939	6.1633	6.4287	5.5603	5.8243	5.3561	4.9982	5.5814	5.115	6.1214	5.923	5.9604	5.1781	5.4164	5.6568
metab_16017	Androsterone glucuronide	C25H38O8	6.8551	Steroids and steroid derivatives	5.3317	5.2172	5.2191	5.5266	5.3292	5.2999	5.4823	5.431	5.5741	5.0296	5.0017	5.0947	4.9533	4.9331	5.095	4.8124	4.8824	4.8327
metab_16019	D-Glucose	C6H12O6	0.9053	Organooxygen compounds	5.7308	5.7723	5.7658	5.7203	5.7232	5.7499	5.8423	5.9424	5.8606	5.789	5.7368	5.785	5.7742	5.8749	5.7125	5.668	5.7068	5.7889
metab_16020	Dehydroascorbic acid	C6H6O6	1.8226	Lactones	7.3129	7.3341	7.3597	7.5676	7.4673	7.4149	7.5714	7.3648	7.5027	7.4143	7.1507	7.2981	7.072	7.2379	7.1667	7.148	7.339	7.1691
metab_16022	Dodecanedioic acid	C12H22O4	6.2367	Fatty Acyls	5.4974	5.4869	5.5182	5.674	5.6539	5.6693	5.702	5.6404	5.5579	5.8327	5.5162	5.4957	5.1956	5.4927	5.4988	5.2656	5.4301	5.2601
metab_16023	Dulcitol	C6H14O6	0.8984	Organooxygen compounds	4.9957	4.9997	5.0216	4.6405	4.6473	4.7577	4.7497	4.7616	4.8688	4.9747	4.9909	5.0355	5.233	5.0763	4.9872	5.2873	5.1279	5.3715
metab_16025	Glycogen	C24H42O21	2.2523	Organooxygen compounds	5.463	5.4379	5.4293	4.021	3.4446	4.5244	3.4734	3.8106	3.4369	4.6273	5.2652	5.203	5.7412	5.5451	5.7513	6.0293	5.7033	5.7698
metab_16027	Homocysteine	C4H9NO2S	0.9396	Carboxylic acids and derivatives	4.3006	4.4549	4.4407	4.6642	4.1185	4.4981	4.5557	4.6217	4.1246	4.1157	4.4324	4.2022	4.4697	4.6796	4.7742	3.747	3.8103	4.0881
metab_16028	LysoPC(18:0)	C26H54NO7P	7.2187	Glycerophospholipids	5.996	5.9409	5.905	5.9869	5.9572	5.8798	6.0235	5.8746	6.0052	5.9214	6.0743	5.9173	5.779	5.8841	5.826	5.6659	5.7885	5.6248
metab_16029	Malic acid	C4H6O5	1.0696	Hydroxy acids and derivatives	8.0658	8.1003	8.1153	7.9676	8.1004	8.0513	8.0846	8.1543	8.1505	8.1783	8.1055	8.1831	8.0161	7.9739	8.0289	8.1609	8.225	8.1768
metab_16032	SN-38	C22H20N2O5	2.475	Camptothecins	5.829	5.7879	5.7942	5.4355	5.6217	5.4708	5.4813	5.6249	5.693	5.8005	5.8996	5.7849	5.937	5.8519	5.8583	5.8593	5.9336	5.9792

## Sheet: Table S3
Table S3 Distribution of the compounds in different subclusters
	subcluster1	subcluster2	subcluster3
Compounds	587	185	297
Carboxylic acids and derivatives	82	28	17
Fatty Acyls	81	23	13
Prenol lipids	52	12	7
Organooxygen compounds	27	22	22
Glycerophospholipids	24	4	24
Steroids and steroid derivatives	18	4	2
Purine nucleosides	8	2	3
Benzene and substituted derivatives	7	8	3
Flavonoids	7	5	0
Isoflavonoids	0	3	1
Keto acids and derivatives	5	2	1
Hydroxy acids and derivatives	5	1	1
Glycerolipids	5	1	1
Benzopyrans	4	2	0
Phenols	4	4	0
Peptidomimetics	3	1	1
Cinnamic acids and derivatives	3	4	1
Pyrimidine nucleosides	3	1	1
Imidazopyrimidines	3	0	1
Pyridines and derivatives	3	3	3
Azolidines	3	1	0
Indoles and derivatives	2	3	2
Coumarins and derivatives	2	7	0
Pyrrolidines	2	0	1
Diazines	2	1	0
Purine nucleotides	2	0	3
Lactones	1	0	3
Pteridines and derivatives	1	0	3
Anthracenes	0	3	1
Saccharolipids	1	2	0
Others	227	150	70

## Sheet: Table S4
Table S4 Statistics of transcriptome assembly results
Type	Unigene	Transcript
Total number	97829	186639
Total base	88005451	196150087
Largest length (bp)	15840	15840
Smallest length (bp)	201	201
Average length (bp)	899.58	1050.96
N50 length (bp)	1598	1777
E90N50 length (bp)	2884	2351
Fragment mapped percent(%)	58.075	74.354
GC percent (%)	38.76	39.1
TransRate score	0.20353	0.27314
BUSCO score	C:65.7%[S:63%;D:2.7%]	C:86.7%[S:48.3%;D:38.4%]

## Sheet: Table S5
Table S5 Summary of RNA-seq data and sequence alignment of the samples
Sample	Raw reads	Clean reads	Pair reads	Mapped reads	Mapped ratio	Q30(%)	GC content(%)
Oct.31_1	51100438	49816822	24908411	18068119	0.7254	92.52	43.73
Oct.31_2	54412718	52563572	26281786	19137860	0.7282	91.88	43.69
Oct.31_3	47300786	45590374	22795187	16496987	0.7237	91.55	43.59
Nov.08_1	51253566	49628136	24814068	18155188	0.7316	92.16	43.49
Nov.08_2	50266896	48679814	24339907	18012707	0.74	91.93	43.64
Nov.08_3	47237480	45796252	22898126	16894268	0.7378	92.35	43.63
Nov.15_1	49064896	47546072	23773036	17427443	0.7331	91.52	43.5
Nov.15_2	52695852	51161296	25580648	19053276	0.7448	92.4	43.87
Nov.15_3	54276002	52486808	26243404	19120760	0.7286	91.83	43.45
Nov.22_1	66472128	64507750	32253875	24236433	0.7514	92.3	43.52
Nov.22_2	67280728	65542448	32771224	24466933	0.7466	92.48	43.55
Nov.22_3	44521688	43271254	21635627	16099525	0.7441	92.82	43.49
Dec.01_1	51011122	49266722	24633361	17860486	0.7251	91.36	43.37
Dec.01_2	75550984	72963680	36481840	27046653	0.7414	92.18	43.32
Dec.01_3	49420706	47953456	23976728	17448072	0.7277	91.75	43.44

## Sheet: Table S6
Table S6 GO and KEGG enrichment analysis of DEGs in the five subclusters
	Number	GO ID	Term Type	Description	Rich factor	P-value	Number	Pathway id	Description	Rich factor	P-value	Second Category
Subcluster 1	49	GO:0034357	CC	photosynthetic membrane	0.215859	3.83912e-18	25	map00195	Photosynthesis	0.316456	6.7461e-15	Energy metabolism
	49	GO:0042651	CC	thylakoid membrane	0.215859	3.83912e-18	10	map00591	Linoleic acid metabolism	0.25641	7.978e-06	Lipid metabolism
	48	GO:0009535	CC	chloroplast thylakoid membrane	0.219178	4.36023e-18	7	map00196	Photosynthesis - antenna proteins	0.411765	5.74146e-06	Energy metabolism
	48	GO:0055035	CC	plastid thylakoid membrane	0.218182	5.30809e-18	10	map00941	Flavonoid biosynthesis	0.169492	0.000341515	Biosynthesis of other secondary metabolites
	29	GO:0015979	BP	photosynthesis	0.298969	3.00817e-15	15	map00040	Pentose and glucuronate interconversions	0.116279	0.000922117	Carbohydrate metabolism
	82	GO:0005576	CC	extracellular region	0.12462	5.26312e-14	14	map00710	Carbon fixation in photosynthetic organisms	0.104478	0.00368848	Energy metabolism
	52	GO:0042170	CC	plastid membrane	0.150289	2.04217e-12	14	map00052	Galactose metabolism	0.104478	0.00368848	Carbohydrate metabolism
	7	GO:0009538	CC	photosystem I reaction center	0.875	6.27118e-09	30	map04075	Plant hormone signal transduction	0.0787402	0.00327368	Signal transduction
	14	GO:0009521	CC	photosystem	0.297872	4.64525e-08	8	map00860	Porphyrin and chlorophyll metabolism	0.133333	0.00618714	Metabolism of cofactors and vitamins
	11	GO:0009523	CC	photosystem II	0.37931	7.74732e-08	13	map00480	Glutathione metabolism	0.0984848	0.0082269	Metabolism of other amino acids
	43	GO:0005618	CC	cell wall	0.116216	4.52616e-07	4	map00945	Stilbenoid, diarylheptanoid and gingerol biosynthesis	0.2	0.0122162	Biosynthesis of other secondary metabolites
	43	GO:0030312	CC	external encapsulating structure	0.113158	8.00102e-07	7	map00910	Nitrogen metabolism	0.12963	0.011832	Energy metabolism
	10	GO:0009522	CC	photosystem I	0.3125	2.40966e-06	7	map04712	Circadian rhythm - plant	0.111111	0.0259336	Environmental adaptation
	29	GO:0031226	CC	intrinsic component of plasma membrane	0.126087	5.67328e-06	2	map00902	Monoterpenoid biosynthesis	0.25	0.0498131	Metabolism of terpenoids and polyketides
	30	GO:0048046	CC	apoplast	0.114943	2.58751e-05	8	map00280	Valine, leucine and isoleucine degradation	0.091954	0.0481445	Amino acid metabolism
	220	GO:0016491	MF	oxidoreductase activity	0.0686213	2.68841e-06
	7	GO:0009765	BP	photosynthesis, light harvesting	0.411765	1.01869e-05
	6	GO:0009768	BP	photosynthesis, light harvesting in photosystem I	0.5	1.15779e-05
	10	GO:0048511	BP	rhythmic process	0.263158	1.33822e-05
	7	GO:0009654	CC	photosystem II oxygen evolving complex	0.333333	5.09616e-05
Subcluster 2	19	GO:0044550	BP	secondary metabolite biosynthetic process	0.283582	4.41733e-13	38	map00940	Phenylpropanoid biosynthesis	0.154472	1.04052e-14	Biosynthesis of other secondary metabolites
	12	GO:0009813	BP	flavonoid biosynthetic process	0.3	4.49083e-09	18	map00941	Flavonoid biosynthesis	0.305085	8.10612e-13	Biosynthesis of other secondary metabolites
	10	GO:0016210	MF	naringenin-chalcone synthase activity	0.434783	1.33182e-09	14	map00592	alpha-Linolenic acid metabolism	0.159091	2.09787e-06	Lipid metabolism
	22	GO:0019748	BP	secondary metabolic process	0.148649	5.19573e-09	6	map00945	Stilbenoid, diarylheptanoid and gingerol biosynthesis	0.3	4.58095e-05	Biosynthesis of other secondary metabolites
	77	GO:0006082	BP	organic acid metabolic process	0.0681416	6.36823e-09	10	map04712	Circadian rhythm - plant	0.15873	6.15204e-05	Environmental adaptation
	12	GO:0009812	BP	flavonoid metabolic process	0.285714	8.35454e-09	8	map00910	Nitrogen metabolism	0.148148	0.000541538	Energy metabolism
	74	GO:0043436	BP	oxoacid metabolic process	0.0665468	2.61176e-08	17	map04016	MAPK signaling pathway - plant	0.0809524	0.00118048	Signal transduction
	7	GO:0009695	BP	jasmonic acid biosynthetic process	0.583333	3.20139e-08	6	map00908	Zeatin biosynthesis	0.157895	0.00191096	Metabolism of terpenoids and polyketides
	72	GO:0019752	BP	carboxylic acid metabolic process	0.0671016	3.56513e-08	6	map00943	Isoflavonoid biosynthesis	0.15	0.00250467	Biosynthesis of other secondary metabolites
	54	GO:0044283	BP	small molecule biosynthetic process	0.074896	5.03046e-08	24	map04075	Plant hormone signal transduction	0.0629921	0.00415267	Signal transduction
	7	GO:0030639	BP	polyketide biosynthetic process	0.538462	6.73439e-08	11	map00630	Glyoxylate and dicarboxylate metabolism	0.0827068	0.00708876	Carbohydrate metabolism
	7	GO:0030638	BP	polyketide metabolic process	0.5	1.30768e-07	6	map00360	Phenylalanine metabolism	0.109091	0.0121854	Amino acid metabolism
	61	GO:0003700	MF	DNA-binding transcription factor activity	0.0695553	1.06429e-07	8	map00280	Valine, leucine and isoleucine degradation	0.091954	0.0111667	Amino acid metabolism
	44	GO:0016705	MF	oxidoreductase activity, acting on paired donors, with incorporation or reduction of molecular oxygen	0.0804388	1.15544e-07	4	map00904	Diterpenoid biosynthesis	0.153846	0.0120717	Metabolism of terpenoids and polyketides
	11	GO:0009699	BP	phenylpropanoid biosynthetic process	0.234043	3.31202e-07	5	map00670	One carbon pool by folate	0.128205	0.0111585	Metabolism of cofactors and vitamins
	105	GO:0044281	BP	small molecule metabolic process	0.0556734	3.73243e-07	8	map00900	Terpenoid backbone biosynthesis	0.0851064	0.0172388	Metabolism of terpenoids and polyketides
	38	GO:0032787	BP	monocarboxylic acid metabolic process	0.0835165	4.76314e-07	3	map00750	Vitamin B6 metabolism	0.1875	0.0170409	Metabolism of cofactors and vitamins
	43	GO:0016053	BP	organic acid biosynthetic process	0.0777577	4.95266e-07	21	map01240	Biosynthesis of cofactors	0.0572207	0.0192397	Global and overview maps
	20	GO:0016298	MF	lipase activity	0.125	4.66566e-07	6	map00130	Ubiquinone and other terpenoid-quinone biosynthesis	0.09375	0.0242673	Metabolism of cofactors and vitamins
	41	GO:0020037	MF	heme binding	0.0788462	5.09678e-07	7	map00240	Pyrimidine metabolism	0.0843373	0.0262199	Nucleotide metabolism
Subcluster 3	3032	GO:0110165	CC	cellular anatomical entity	0.0909171	1.16372e-30	22	map00380	Tryptophan metabolism	0.30137	8.43869e-08	Amino acid metabolism
	3111	GO:0005575	CC	cellular_component	0.0887678	2.48605e-24	73	map01240	Biosynthesis of cofactors	0.158038	2.59584e-06	Global and overview maps
	120	GO:0005576	CC	extracellular region	0.182371	1.9924e-18	14	map03030	DNA replication	0.160494	3.89955e-05	Replication and repair
	243	GO:0044281	BP	small molecule metabolic process	0.128844	5.83392e-15	14	map00360	Phenylalanine metabolism	0.254545	0.000147083	Amino acid metabolism
	476	GO:0043229	CC	intracellular organelle	0.051504	1.63224e-14	21	map00071	Fatty acid degradation	0.205882	0.000109656	Lipid metabolism
	476	GO:0043226	CC	organelle	0.0514762	1.65673e-14	61	map00500	Starch and sucrose metabolism	0.151203	0.000118082	Carbohydrate metabolism
	45	GO:0009451	BP	RNA modification	0.139319	5.12011e-14	14	map00100	Steroid biosynthesis	0.26	0.000200159	Lipid metabolism
	359	GO:0016491	MF	oxidoreductase activity	0.111978	1.17437e-12	11	map00591	Linoleic acid metabolism	0.282051	0.000283511	Lipid metabolism
	420	GO:0043227	CC	membrane-bounded organelle	0.0511447	4.61159e-12	24	map00330	Arginine and proline metabolism	0.2	0.000338824	Amino acid metabolism
	418	GO:0043231	CC	intracellular membrane-bounded organelle	0.0511065	5.46842e-12	28	map00260	Glycine, serine and threonine metabolism	0.190476	0.000468285	Amino acid metabolism
	149	GO:0006629	BP	lipid metabolic process	0.134355	6.61453e-11	15	map00410	beta-Alanine metabolism	0.21875	0.000786764	Metabolism of other amino acids
	68	GO:0006974	BP	cellular response to DNA damage stimulus	0.0892388	7.48115e-11	11	map00511	Other glycan degradation	0.3	0.000613515	Glycan biosynthesis and metabolism
	1119	GO:0031224	CC	intrinsic component of membrane	0.0910274	1.42446e-10	26	map00561	Glycerolipid metabolism	0.181034	0.00069242	Lipid metabolism
	107	GO:0044283	BP	small molecule biosynthetic process	0.148405	1.55695e-10	10	map00062	Fatty acid elongation	0.27027	0.000772711	Lipid metabolism
	86	GO:0016705	MF	oxidoreductase activity, acting on paired donors, with incorporation or reduction of molecular oxygen	0.157221	5.26917e-10	14	map00350	Tyrosine metabolism	0.212121	0.00108502	Amino acid metabolism
	47	GO:0051213	MF	dioxygenase activity	0.20524	8.30687e-10	29	map00040	Pentose and glucuronate interconversions	0.170543	0.00119561	Carbohydrate metabolism
	1107	GO:0016021	CC	integral component of membrane	0.0905077	8.51937e-10	6	map00604	Glycosphingolipid biosynthesis - ganglio series	0.571429	0.00146306	Glycan biosynthesis and metabolism
	193	GO:0005975	BP	carbohydrate metabolic process	0.121003	1.13313e-09	40	map00940	Phenylpropanoid biosynthesis	0.142276	0.00168634	Biosynthesis of other secondary metabolites
	64	GO:0005618	CC	cell wall	0.172973	1.96733e-09	23	map00053	Ascorbate and aldarate metabolism	0.174757	0.0024364	Carbohydrate metabolism
	63	GO:0006281	BP	DNA repair	0.0849057	3.94316e-09	8	map00950	Isoquinoline alkaloid biosynthesis	0.266667	0.00282319	Biosynthesis of other secondary metabolites
Subcluster 4	131	GO:0004674	MF	protein serine/threonine kinase activity	0.0929078	2.29961e-24	23	map04016	MAPK signaling pathway - plant	0.109524	6.63546e-08	Signal transduction
	167	GO:0004672	MF	protein kinase activity	0.0808325	3.57336e-24	23	map04626	Plant-pathogen interaction	0.0934959	1.14239e-06	Environmental adaptation
	175	GO:0016773	MF	phosphotransferase activity, alcohol group as acceptor	0.0751395	9.06251e-22	12	map00040	Pentose and glucuronate interconversions	0.0930233	0.000441842	Carbohydrate metabolism
	86	GO:0003700	MF	DNA-binding transcription factor activity	0.0980616	1.02438e-17	24	map04075	Plant hormone signal transduction	0.0629921	0.000426695	Signal transduction
	90	GO:0140110	MF	transcription regulator activity	0.0876339	1.90167e-15	17	map00520	Amino sugar and nucleotide sugar metabolism	0.0752212	0.000408194	Carbohydrate metabolism
	204	GO:0016301	MF	kinase activity	0.060177	1.24186e-14	9	map00053	Ascorbate and aldarate metabolism	0.0873786	0.00343448	Carbohydrate metabolism
	274	GO:0140096	MF	catalytic activity, acting on a protein	0.0528651	1.10335e-12	4	map00740	Riboflavin metabolism	0.173913	0.00427119	Metabolism of cofactors and vitamins
	121	GO:0005886	CC	plasma membrane	0.067036	7.48143e-12	5	map00908	Zeatin biosynthesis	0.131579	0.00495933	Metabolism of terpenoids and polyketides
	58	GO:0016310	BP	phosphorylation	0.0797799	8.3185e-09	9	map00052	Galactose metabolism	0.0671642	0.0180536	Carbohydrate metabolism
	50	GO:0006468	BP	protein phosphorylation	0.0844595	1.2463e-08	9	map00480	Glutathione metabolism	0.0681818	0.0165213	Metabolism of other amino acids
	48	GO:0030246	MF	carbohydrate binding	0.0839161	2.95002e-08	2	map00524	Neomycin, kanamycin and gentamicin biosynthesis	0.25	0.0216988	Biosynthesis of other secondary metabolites
	519	GO:0016021	CC	integral component of membrane	0.0424332	8.70972e-08	18	map01240	Biosynthesis of cofactors	0.0490463	0.0252247	Global and overview maps
	519	GO:0031224	CC	intrinsic component of membrane	0.0422191	1.74614e-07	13	map00940	Phenylpropanoid biosynthesis	0.0528455	0.031504	Biosynthesis of other secondary metabolites
	24	GO:0008037	BP	cell recognition	0.116505	2.84086e-07
	24	GO:0048544	BP	recognition of pollen	0.116505	2.84086e-07
	6	GO:0016847	MF	1-aminocyclopropane-1-carboxylate synthase activity	0.6	3.36318e-07
	52	GO:0043565	MF	sequence-specific DNA binding	0.0747126	3.53842e-07
	45	GO:0106310	MF	protein serine kinase activity	0.0767918	1.10126e-06
	435	GO:0016740	MF	transferase activity	0.0422043	4.5053e-06
	8	GO:0010200	BP	response to chitin	0.275862	4.87342e-06
Subcluster 5	5	GO:0038202	BP	TORC1 signaling	0.714286	5.36505e-06	20	map03008	Ribosome biogenesis in eukaryotes	0.101523	0.00174443	Translation
	5	GO:0016242	BP	negative regulation of macroautophagy	0.714286	5.36505e-06	9	map04712	Circadian rhythm - plant	0.142857	0.00353468	Environmental adaptation
	6	GO:0031929	BP	TOR signaling	0.5	9.6854e-06	9	map04136	Autophagy - other	0.136364	0.00485117	Transport and catabolism
	8	GO:0001558	BP	regulation of cell growth	0.32	1.64321e-05	16	map00564	Glycerophospholipid metabolism	0.0981595	0.0066541	Lipid metabolism
	6	GO:0030307	BP	positive regulation of cell growth	0.461538	1.724e-05	7	map00906	Carotenoid biosynthesis	0.122807	0.0212534	Metabolism of terpenoids and polyketides
	6	GO:0009895	BP	negative regulation of catabolic process	0.428571	2.89178e-05	23	map03040	Spliceosome	0.071875	0.0449633	Transcription
	6	GO:0031330	BP	negative regulation of cellular catabolic process	0.428571	2.89178e-05
	5	GO:0010116	BP	positive regulation of abscisic acid biosynthetic process	0.555556	2.96353e-05
	5	GO:1901654	BP	response to ketone	0.555556	2.96353e-05
	5	GO:1901355	BP	response to rapamycin	0.555556	2.96353e-05
	5	GO:0046889	BP	positive regulation of lipid biosynthetic process	0.555556	2.96353e-05
	5	GO:1902932	BP	positive regulation of alcohol biosynthetic process	0.555556	2.96353e-05
	5	GO:1902659	BP	regulation of glucose mediated signaling pathway	0.555556	2.96353e-05
	5	GO:1902661	BP	positive regulation of glucose mediated signaling pathway	0.555556	2.96353e-05
	5	GO:0050687	BP	negative regulation of defense response to virus	0.555556	2.96353e-05
	5	GO:0009745	BP	sucrose mediated signaling	0.555556	2.96353e-05
	5	GO:0045995	BP	regulation of embryonic development	0.555556	2.96353e-05
	5	GO:0040019	BP	positive regulation of embryonic development	0.555556	2.96353e-05
	5	GO:0045828	BP	positive regulation of isoprenoid metabolic process	0.555556	2.96353e-05
	5	GO:0045472	BP	response to ether	0.555556	2.96353e-05

## Sheet: Table S7
Table S7 qRT-PCR data for genes
Sample	18S mean	Scrk						Sample	18S mean	AMY						Sample	18S mean	CYP707A						Sample	18S mean	GID2
		CT	ΔCT	ΔCT mean	ΔΔCT	2-ΔΔCT				CT	ΔCT	ΔCT mean	ΔΔCT	2-ΔΔCT				CT	ΔCT	ΔCT mean	ΔΔCT	2-ΔΔCT				CT	ΔCT	ΔCT mean	ΔΔCT	2-ΔΔCT
Oct.31_1	15.105	22.9268	7.82184	7.84657	-0.0247296	1.01729		Oct.31_1	15.105	27.9218	12.8168	12.6344	0.182446	0.881208		Oct.31_1	15.105	22.9888	7.88388	7.89625	-0.0123732	1.00861		Oct.31_1	15.105	23.7769	8.67198		-0.041244	1.029
Oct.31_2		22.969	7.86407		0.0174991	0.987944		Oct.31_2		27.5434	12.4384		-0.19598	1.1455		Oct.31_2		23.0297	7.9247		0.0284556	0.980469		Oct.31_2		23.9107	8.80578		0.0925526	0.937862
Oct.31_3		22.9588	7.8538		0.00723187	0.995		Oct.31_3		27.7529	12.6479		0.0135273	0.990667		Oct.31_3		22.9851	7.88017		-0.016081	1.01121		Oct.31_3		23.7669	8.66192	8.71322	-0.0513072	1.0362
Nov.08_1	15.9806	24.1874	8.20681		0.360242	0.779034		Nov.08_1	15.9806	28.3329	12.3523		-0.28206	1.21593		Nov.08_1	15.9806	22.9194	6.93881		-0.957442	1.94186		Nov.08_1	15.9806	24.1197	8.13912		-0.574104	1.48875
Nov.08_2		24.1499	8.16929		0.322721	0.799561		Nov.08_2		27.9337	11.9532		-0.681226	1.6035		Nov.08_2		22.9337	6.95311		-0.943142	1.92271		Nov.08_2		24.2731	8.29258		-0.420644	1.33853
Nov.08_3		24.1354	8.15478		0.308217	0.807639		Nov.08_3		27.3622	11.3816		-1.2528	2.38303		Nov.08_3		22.946	6.96545		-0.930803	1.90634		Nov.08_3		24.1163	8.13572		-0.577505	1.49227
Nov.15_1	15.2084	24.0188	8.81045		0.963884	0.512675		Nov.15_1	15.2084	27.2479	12.0395		-0.594886	1.51035		Nov.15_1	15.2084	22.8554	7.647		-0.249248	1.18859		Nov.15_1	15.2084	23.3397	8.13131		-0.581916	1.49684
Nov.15_2		24.0423	8.83387		0.987299	0.504421		Nov.15_2		26.4872	11.2788		-1.35556	2.55897		Nov.15_2		22.6737	7.46532		-0.430929	1.3481		Nov.15_2		23.3879	8.17955		-0.533673	1.44761
Nov.15_3		23.9916	8.78317		0.936603	0.522461		Nov.15_3		26.8936	11.6852		-0.949176	1.93077		Nov.15_3		22.7938	7.58544		-0.31081	1.2404		Nov.15_3		23.2955	8.08711		-0.626109	1.5434
Nov.22_1	15.3646	25.1911	9.82645		1.97989	0.25351		Nov.22_1	15.3646	27.7905	12.4259		-0.208532	1.15551		Nov.22_1	15.3646	20.9594	5.59481		-2.30144	4.92948		Nov.22_1	15.3646	23.7279	8.36327		-0.349958	1.27452
Nov.22_2		25.0695	9.70487		1.8583	0.275801		Nov.22_2		27.3847	12.0201		-0.614259	1.53077		Nov.22_2		21.0968	5.73219		-2.16406	4.48175		Nov.22_2		23.7603	8.39574		-0.317483	1.24615
Nov.22_3		25.169	9.80443		1.95786	0.25741		Nov.22_3		27.7323	12.3677		-0.266657	1.20302		Nov.22_3		21.0089	5.64427		-2.25197	4.76334		Nov.22_3		23.8068	8.44215		-0.271076	1.20671
Dec.01_1	15.5866	26.5877	11.0012		3.15459	0.112299		Dec.01_1	15.5866	28.4963	12.9097		0.275344	0.826253		Dec.01_1	15.5866	20.9254	5.3388		-2.55745	5.88667		Dec.01_1	15.5866	24.8578	9.2712		0.557979	0.679253
Dec.01_2		26.8681	11.2815		3.43492	0.0924666		Dec.01_2		28.0732	12.4867		-0.147734	1.10783		Dec.01_2		20.7853	5.19871		-2.69754	6.48695		Dec.01_2		24.7839	9.19735		0.48413	0.714928
Dec.01_3		26.5024	10.9158		3.06923	0.119143		Dec.01_3		28.3207	12.7342		0.099769	0.933182		Dec.01_3		20.8847	5.29817		-2.59808	6.05481		Dec.01_3		24.7514	9.1648		0.451581	0.731241
Sample	18S mean	ISA1						Sample	18S mean	TPP						Sample	18S mean	PPLZ02						Sample	18S mean	PYL6
		CT	ΔCT	ΔCT mean	ΔΔCT	2-ΔΔCT				CT	ΔCT	ΔCT mean	ΔΔCT	2-ΔΔCT				CT	ΔCT	ΔCT mean	ΔΔCT	2-ΔΔCT				CT	ΔCT	ΔCT mean	ΔΔCT	2-ΔΔCT
Oct.31_1	19.1412	27.9057	8.76446	8.71364	0.0508211	0.965387		Oct.31_1	19.1412	26.3156	7.1744	7.28322	-0.108815	1.07834		Oct.31_1	19.1412	27.2177	8.07654	8.16249	-0.0859517	1.06139		Oct.31_1	19.1412	28.6067	9.4655		-0.159114	1.1166
Oct.31_2		27.677	8.53584		-0.177792	1.13115		Oct.31_2		26.3772	7.23599		-0.0472233	1.03327		Oct.31_2		27.2835	8.14235		-0.0201444	1.01406		Oct.31_2		29.3465	10.2053		0.580672	0.668652
Oct.31_3		27.9818	8.84061		0.126972	0.915751		Oct.31_3		26.5805	7.43926		0.156039	0.897486		Oct.31_3		27.4098	8.26859		0.106097	0.929098		Oct.31_3		28.3443	9.20306	9.62462	-0.421559	1.33937
Nov.08_1	19.4399	27.6087	8.16875		-0.54489	1.45891		Nov.08_1	19.4399	27.2893	7.84932		0.566105	0.675438		Nov.08_1	19.4399	26.5562	7.11621		-1.04628	2.0652		Nov.08_1	19.4399	30.0785	10.6385		1.01391	0.495202
Nov.08_2		27.4937	8.05374		-0.659896	1.57997		Nov.08_2		28.9744	9.5345		0.64091	0.641307		Nov.08_2		26.3753	6.93533		-1.22717	2.34107		Nov.08_2		29.9592	10.5192		0.894615	0.537891
Nov.08_3		27.6586	8.21863		-0.495002	1.40932		Nov.08_3		27.6505	8.21059		0.927374	0.525815		Nov.08_3		26.9131	7.47319		-0.689302	1.6125		Nov.08_3		30.1431	10.7032		1.07854	0.473509
Nov.15_1	20.173	26.6924	6.51945		-2.19419	4.57632		Nov.15_1	20.173	28.0033	7.83026		0.54704	0.684423		Nov.15_1	20.173	25.0064	4.83337		-3.32913	10.05		Nov.15_1	20.173	29.0444	8.87137		-0.753245	1.68558
Nov.15_2		26.5164	6.34338		-2.37025	5.17032		Nov.15_2		27.9307	7.7577		0.474481	0.719726		Nov.15_2		24.8757	4.70271		-3.45979	11.0027		Nov.15_2		29.0414	8.86844		-0.756182	1.68902
Nov.15_3		26.4455	6.27253		-2.4411	5.43057		Nov.15_3		27.7052	7.53217		0.248949	0.84151		Nov.15_3		24.844	4.67102		-3.49147	11.247		Nov.15_3		29.0013	8.82829		-0.796324	1.73667
Nov.22_1	20.4475	29.4216	8.97414		0.260508	0.834794		Nov.22_1	20.4475	26.2182	5.77066		-1.51255	2.85314		Nov.22_1	20.4475	26.0521	5.60462		-2.55787	5.8884		Nov.22_1	20.4475	29.3936	8.94614		-0.678481	1.60045
Nov.22_2		28.8676	8.42006		-0.293573	1.22567		Nov.22_2		25.8532	5.40569		-1.87753	3.67444		Nov.22_2		25.7059	5.25839		-2.90411	7.48554		Nov.22_2		28.9689	8.52138		-1.10324	2.14836
Nov.22_3		29.0775	8.62997		-0.0836693	1.05971		Nov.22_3		26.1276	5.68014		-1.60308	3.03791		Nov.22_3		25.8747	5.42715		-2.73534	6.65917		Nov.22_3		29.0681	8.6206		-1.00402	2.00558
Dec.01_1	20.8997	29.6502	8.75057		0.0369311	0.974726		Dec.01_1	20.8997	28.3886	7.48894		0.205721	0.867105		Dec.01_1	20.8997	28.1684	7.2688		-0.893695	1.85793		Dec.01_1	20.8997	30.6348	9.73515		0.110535	0.926245
Dec.01_2		29.6452	8.74554		0.0319014	0.97813		Dec.01_2		28.1827	7.28302		-0.000198252	1.00014		Dec.01_2		28.0844	7.18474		-0.977756	1.9694		Dec.01_2		29.9007	9.001		-0.623621	1.54074
Dec.01_3		29.6425	8.74287		0.029235	0.97994		Dec.01_3		27.7258	6.82617		-0.45705	1.37273		Dec.01_3		27.9667	7.06708		-1.09541	2.13674		Dec.01_3		32.0291	11.1294		1.50482	0.352374
Sample	18S mean	SAUR32						Sample	18S mean	GA2ox2						Sample	18S mean	WRKY54						Sample	18S mean	GA3
		CT	ΔCT	ΔCT mean	ΔΔCT	2-ΔΔCT				CT	ΔCT	ΔCT mean	ΔΔCT	2-ΔΔCT				CT	ΔCT	ΔCT mean	ΔΔCT	2-ΔΔCT				CT	ΔCT	ΔCT mean	ΔΔCT	2-ΔΔCT
Oct.31_1	15.0252	24.3516	9.32634	9.35441	-0.0280751	1.01965		Oct.31_1	15.0252	22.8742	7.84894	7.8588	-0.00986001	1.00686		Oct.31_1	15.0252	20.5103	5.48511	5.53757	-0.0524618	1.03703		Oct.31_1	15.0252	24.7606	9.7354	9.58196	0.153438	0.899105
Oct.31_2		24.3417	9.31648		-0.0379285	1.02664		Oct.31_2		22.9669	7.94171		0.0829134	0.944149		Oct.31_2		20.6052	5.57994		0.0423621	0.971064		Oct.31_2		24.6168	9.59155		0.00959373	0.993372
Oct.31_3		24.4456	9.42042		0.0660049	0.95528		Oct.31_3		22.811	7.78574		-0.0730543	1.05194		Oct.31_3		20.5729	5.54767		0.0101012	0.993023		Oct.31_3		24.4442	9.41893		-0.163031	1.11964
Nov.08_1	16.0709	24.9515	8.88064		-0.473775	1.38874		Nov.08_1	16.0709	23.5257	7.45474		-0.404056	1.32322		Nov.08_1	16.0709	20.0824	4.01144		-1.52613	2.88012		Nov.08_1	16.0709	25.1384	9.06751		-0.514453	1.42845
Nov.08_2		24.7929	8.72203		-0.632384	1.55012		Nov.08_2		23.5037	7.4328		-0.425994	1.3435		Nov.08_2		20.0572	3.98628		-1.55129	2.9308		Nov.08_2		25.033	8.96212		-0.619835	1.5367
Nov.08_3		24.7879	8.71697		-0.637443	1.55557		Nov.08_3		23.2549	7.18395		-0.674844	1.59642		Nov.08_3		20.1917	4.12081		-1.41676	2.66985		Nov.08_3		25.0523	8.98139		-0.600569	1.51631
Nov.15_1	15.6827	28.3022	12.6195		3.26506	0.104021		Nov.15_1	15.6827	24.9219	9.23915		1.38035	0.384126		Nov.15_1	15.6827	22.7933	7.11055		1.57298	0.336113		Nov.15_1	15.6827	23.9461	8.26335		-1.31861	2.49425
Nov.15_2		27.4099	11.7272		2.3728	0.19307		Nov.15_2		24.8705	9.18779		1.329	0.398045		Nov.15_2		22.8855	7.20278		1.66521	0.315299		Nov.15_2		23.9233	8.24059		-1.34137	2.53392
Nov.15_3		28.1495	12.4668		3.11235	0.115635		Nov.15_3		24.8251	9.14242		1.28362	0.410762		Nov.15_3		22.7826	7.09986		1.56228	0.338615		Nov.15_3		23.9735	8.29082		-1.29114	2.44722
Nov.22_1	16.0522	24.7527	8.70047		-0.65394	1.57346		Nov.22_1	16.0522	23.4609	7.40865		-0.450147	1.36618		Nov.22_1	16.0522	18.9116	2.85941		-2.67816	6.40041		Nov.22_1	16.0522	24.5801	8.52786		-1.0541	2.07642
Nov.22_2		24.9184	8.86612		-0.488294	1.40279		Nov.22_2		23.4324	7.38012		-0.478677	1.39347		Nov.22_2		18.9252	2.87295		-2.66462	6.3406		Nov.22_2		24.7599	8.7077		-0.874259	1.83307
Nov.22_3		24.94	8.88774		-0.466672	1.38192		Nov.22_3		23.4831	7.43086		-0.427938	1.34531		Nov.22_3		18.9378	2.88555		-2.65202	6.28546		Nov.22_3		24.4798	8.42758		-1.15438	2.22589
Dec.01_1	16.1029	26.6187	10.5158		1.16134	0.447096		Dec.01_1	16.1029	24.1609	8.05795		0.199152	0.871062		Dec.01_1	16.1029	20.8034	4.70045		-0.837121	1.78648		Dec.01_1	16.1029	25.9169	9.81398		0.232026	0.851438
Dec.01_2		26.3503	10.2474		0.892941	0.538515		Dec.01_2		24.1822	8.07933		0.22053	0.85825		Dec.01_2		20.8426	4.7397		-0.797872	1.73853		Dec.01_2		25.8821	9.77923		0.197268	0.872201
Dec.01_3		26.4046	10.3017		0.947275	0.518611		Dec.01_3		24.2024	8.09952		0.240721	0.846322		Dec.01_3		20.6444	4.54143		-0.996139	1.99465		Dec.01_3		25.5079	9.40494		-0.177018	1.13054
Sample	18S mean	TGA3						Sample	18S mean	ABI5						Sample	18S mean	ARF7						Sample	18S mean	LUH
		CT	ΔCT	ΔCT mean	ΔΔCT	2-ΔΔCT				CT	ΔCT	ΔCT mean	ΔΔCT	2-ΔΔCT				CT	ΔCT	ΔCT mean	ΔΔCT	2-ΔΔCT				CT	ΔCT	ΔCT mean	ΔΔCT	2-ΔΔCT
Oct.31_1	19.1412	28.9659	9.82466	9.87641	-0.0517524	1.03652		Oct.31_1	19.1412	26.0891	6.94794	7.17756	-0.229621	1.17253		Oct.31_1	19.1412	27.5278	8.38665	8.53034	-0.143692	1.10473		Oct.31_1	16.5713	32.0605	15.4892	15.4662	0.0230171	0.984172
Oct.31_2		29.0111	9.86994		-0.00647765	1.0045		Oct.31_2		26.1328	6.99159		-0.185973	1.13758		Oct.31_2		27.6605	8.51933		-0.0110126	1.00766		Oct.31_2		31.7802	15.2089		-0.257304	1.19524
Oct.31_3		29.0758	9.93464		0.0582292	0.960442		Oct.31_3		26.7344	7.59316		0.415595	0.74971		Oct.31_3		27.8262	8.68504		0.154704	0.898317		Oct.31_3		32.2718	15.7005		0.234294	0.850101
Nov.08_1	19.4399	30.3881	10.9481		1.07171	0.475755		Nov.08_1	19.4399	27.5684	8.12845		0.950888	0.517314		Nov.08_1	19.4399	29.0277	9.58771		1.05737	0.480508		Nov.08_1	17.3487	32.3187	14.97		-0.496144	1.41044
Nov.08_2		29.9241	10.4842		0.607747	0.656221		Nov.08_2		27.2882	7.84822		0.670655	0.628222		Nov.08_2		29.8992	10.4593		1.92894	0.262622		Nov.08_2		32.9628	15.6141		0.147892	0.902568
Nov.08_3		30.4354	10.9954		1.11901	0.460411		Nov.08_3		27.9035	8.46351		1.28595	0.410101		Nov.08_3		29.0281	9.58817		1.05783	0.480353		Nov.08_3		32.5266	15.1779		-0.288243	1.22115
Nov.15_1	20.173	29.4013	9.22826		-0.648149	1.56716		Nov.15_1	20.173	26.7347	6.56168		-0.615879	1.53249		Nov.15_1	20.173	28.2085	8.03551		-0.49483	1.40915		Nov.15_1	16.6544	33.1067	16.4523		0.986189	0.50481
Nov.15_2		29.3059	9.13292		-0.743492	1.67422		Nov.15_2		26.6595	6.48647		-0.691094	1.61451		Nov.15_2		28.0602	7.88724		-0.643098	1.56168		Nov.15_2		30.7948	14.1405		-1.3257	2.50655
Nov.15_3		29.0933	8.92025		-0.956165	1.94015		Nov.15_3		26.6402	6.46722		-0.710341	1.63619		Nov.15_3		27.9692	7.79618		-0.734166	1.66344		Nov.15_3		31.2041	14.5498		-0.916388	1.88738
Nov.22_1	20.4475	30.6547	10.2072		0.330756	0.79512		Nov.22_1	20.4475	27.7934	7.34593		0.168371	0.889847		Nov.22_1	20.4475	30.8648	10.4173		1.88699	0.270371		Nov.22_1	16.8774	31.7819	14.9044		-0.561713	1.47602
Nov.22_2		30.2638	9.81631		-0.0601059	1.04254		Nov.22_2		27.5481	7.1006		-0.0769675	1.0548		Nov.22_2		30.4713	10.0238		1.49348	0.355155		Nov.22_2		32.8144	15.9369		0.470765	0.721582
Nov.22_3		30.4201	9.97255		0.0961403	0.935533		Nov.22_3		27.9318	7.48434		0.306776	0.808447		Nov.22_3		30.5887	10.1412		1.6109	0.327395		Nov.22_3		31.5886	14.7112		-0.754948	1.68757
Dec.01_1	20.8997	31.9237	11.0241		1.14766	0.451357		Dec.01_1	20.8997	29.0563	8.1567		0.979134	0.507284		Dec.01_1	20.8997	31.23	10.3303		1.79997	0.28718		Dec.01_1	16.9944	33.4443	16.4499		0.983747	0.505665
Dec.01_2		31.8405	10.9408		1.06439	0.478176		Dec.01_2		28.7721	7.87241		0.694849	0.617774		Dec.01_2		31.0793	10.1796		1.64928	0.3188		Dec.01_2		31.9536	14.9592		-0.506994	1.42109
Dec.01_3		31.6155	10.7158		0.839397	0.558877		Dec.01_3		28.6375	7.73781		0.560244	0.678187		Dec.01_3		30.84	9.94031		1.40997	0.376319		Dec.01_3		34.2195	17.2251		1.75896	0.295461

## Sheet: Table S8
	Table S8 FPKM of genes involved in hormone biosynthesis
	gene ID	gene name	Oct.31_1	Oct.31_2	Oct.31_3	Nov.08_1	Nov.08_2	Nov.08_3	Nov.15_1	Nov.15_2	Nov.15_3	Nov.22_1	Nov.22_2	Nov.22_3	Dec.01_1	Dec.01_2	Dec.01_3
ABA	TRINITY_DN3156_c0_g1	crtZ	7.66	6.62	5.94	15.14	12.85	13.43	7.19	6.21	10.44	5.61	16.83	9.35	40.73	57.63	46.13
	TRINITY_DN4643_c1_g1	ZEP/ ABA1	12.87	13.5	13.87	18.74	18.72	16.27	15.68	12.37	16.88	12.92	14.58	11.28	25.97	25.68	32.17
	TRINITY_DN454_c0_g1	ZEP/ ABA1	13.44	16.21	16.4	28.64	28.33	43.1	26.79	43.65	28.23	12.34	17.96	17.86	14.1	13.93	9.64
	TRINITY_DN42872_c0_g1	NCED	0.12	0.4	0.2	0.28	0.43	0.88	0.48	2.89	1.48	0.07	0.14	0.31	0.47	0.22	0.32
	TRINITY_DN6218_c0_g1	NCED	7.21	24.29	7.7	5.68	3.49	17.65	23.23	25.74	31.91	1.15	2.9	1.62	0.98	4.42	1.11
	TRINITY_DN24320_c0_g1	CYP707A2	37.34	26.69	29.21	76.39	17.53	21.45	87.21	55.96	56.65	129.86	111.41	125.74	271.14	182.02	232.61
	TRINITY_DN854_c0_g1	CYP707A2	19.77	16.73	24.55	38.98	12.38	10.77	56.72	17.8	31.19	78.09	75.09	54.54	101.92	78.77	80.98
	TRINITY_DN54548_c0_g1	CYP707A2	1.96	1.54	1.25	0.6	0.27	1.39	0.79	0.75	0.63	0.35	0.86	0.86	4.26	5.62	3.55
	TRINITY_DN5439_c0_g2	CYP707A4	2.76	2.96	2.07	14.95	13.8	10.74	1.42	1.34	2.34	3.93	6.91	6.11	15.67	21.51	22.94
	TRINITY_DN26905_c0_g1	CYP707A1	2.66	5.83	1.52	4.85	0.81	2.41	5.64	5.47	3.68	4.96	5.31	6.38	1.87	2.51	2.44
	TRINITY_DN293_c0_g1	AOG	39.97	37.95	46.65	59.07	121.03	59.51	25.6	34.78	19.18	41.34	32.06	51.77	34.36	43.38	47.06
	TRINITY_DN67050_c0_g1	AOG	7.56	5.98	15.23	0	0	0	0	0	7.66	0	0	0	5.76	0	0
GA	TRINITY_DN53995_c0_g1	CPS	0.47	0.59	0.69	1.47	0.8	0.75	0.44	0.35	1.37	1.22	0.75	0.81	0.13	0.07	0.16
	TRINITY_DN34977_c0_g1	CYP701	35.68	35.56	41.15	36.88	21.89	49.73	68.13	49.67	70.98	44.54	22.81	28.09	22.25	24.7	19.51
	TRINITY_DN24105_c0_g1	KAO	3.17	5.14	4.53	2.24	1.49	3.54	7.61	8.02	9.21	6.16	5.49	4.5	1.77	1.27	0.97
	TRINITY_DN29052_c0_g1	GA20ox	0.87	4.22	5.29	3.45	7.6	6.46	5.77	6.28	3.71	3.12	0.54	4.8	1.7	0.41	1.19
	TRINITY_DN8199_c0_g1	GA3ox	1.76	1.92	3.7	1.79	1.15	4.36	8.24	4.04	6.6	2.52	1.6	0.11	0.58	0.16	0.26
	TRINITY_DN4444_c0_g2	GA2ox	5.62	4.4	7.06	6.09	13.53	11.61	1.06	1.39	1.77	7.55	2	9.53	2.11	2.57	1.26
	TRINITY_DN8660_c0_g1	GA2ox	142	144.69	143.81	225.71	112.63	135.48	31.51	71.27	26.78	126.25	138.85	135.32	90.41	77.36	47.96
	TRINITY_DN15101_c0_g1	GA2ox	88.61	108.43	113.41	101.97	157.56	136.26	9.9	12.07	15.89	7.98	7.08	9.19	11.69	8.47	9.87
	TRINITY_DN3058_c1_g1	GA2ox	19.54	19.91	25.01	19.25	26.2	30.02	2.84	6.67	6.32	0.89	1.69	1.34	0.64	1.47	0.96
	TRINITY_DN35494_c0_g1	GA2ox	3.07	2.43	6.48	13.86	25.25	16.03	5.97	2.62	10.4	3.97	0.84	3.19	1.23	1.63	1.15
	TRINITY_DN86747_c0_g1	GA2ox	0	0.18	0.14	0.2	0.26	1.04	0.34	0.91	0.49	0.05	0.1	0	0	0	0.07
	TRINITY_DN29052_c0_g1	GA2ox	0.87	4.22	5.29	3.45	7.6	6.46	5.77	6.28	3.71	3.12	0.54	4.8	1.7	0.41	1.19
	TRINITY_DN10421_c0_g1	GA2ox	1.36	2.59	3.76	0.92	1.69	1.5	0.98	1.48	2.56	0.8	1.89	1.09	1.45	0.79	0.3
IAA	TRINITY_DN44626_c0_g1	TDC2	0.68	1.02	0.44	0.4	0.46	0.98	6.44	2.1	3.38	0.17	0.13	0.32	0.18	0	0.06
	TRINITY_DN875_c0_g1	TDC1	17.32	22.57	18.91	10.6	20	21.8	37.5	35.3	32.94	9.94	13.38	9.15	6.22	7.4	8.78
	TRINITY_DN57307_c0_g1	TDC	6	8.12	5.45	2.17	4.08	5.06	6.64	4.27	8.69	0.68	0.85	1.37	0.5	0.26	0.77
	TRINITY_DN10852_c0_g1	TDC	0.85	0.68	1.04	0.35	0.74	0.95	1.37	0.77	2.8	0.66	0.49	0.32	0.44	0	0
	TRINITY_DN44694_c0_g1	TAA1	0.32	0.17	0.61	0.09	0.69	1.03	1.75	4.66	0.78	0.07	0.17	0.15	0.05	0.12	0
	TRINITY_DN17454_c0_g1	YUCCA6	1.08	0.91	0.67	2	0.71	1.59	2.06	0.97	0.65	2.54	3.33	4.57	2.41	0.77	2.4
	TRINITY_DN29106_c0_g2	YUCCA8	0.52	0.31	0.27	0.33	0.12	0.17	0	0.12	0	2.13	2	1.98	1.76	0.76	0.9
	TRINITY_DN4089_c0_g1	YUCCA10	11.43	10.94	9.39	9.82	16.11	17.61	7.26	13.49	10.39	3.97	7.82	10.42	4.36	5.86	1.52
	TRINITY_DN1896_c0_g2	YUCCA2	1.91	2.38	1.99	0.89	0.96	2.09	1.47	3.75	1.24	0.82	0.68	1.09	0.23	0.2	0.39
	TRINITY_DN9984_c0_g1	AMI	5.6	7.71	6.53	5.63	7.83	10.2	10.25	17.7	9.33	8.24	4.32	9.57	3.31	2.06	2.88
	TRINITY_DN90552_c0_g1	AMI	12.16	10.41	6.11	1.12	1.49	8.62	6.85	30.95	1.65	0.22	0	0.13	0.23	0.1	0.08
	TRINITY_DN17385_c1_g1	AMI	72.3	61.32	40.67	5.04	5.76	22.1	20.42	102.62	10.79	2.45	1.82	0.77	0.3	0.45	0.14
	TRINITY_DN2023_c0_g1	AMI	24.26	20.46	26.91	93.04	92.59	70.16	27.26	22.04	29.98	15.45	46.56	33.34	149.23	86.04	70.96
CTK	TRINITY_DN56166_c0_g2	IPT4	1.93	1.5	3.02	1.55	0.31	0.28	0.27	1.37	1.34	1.4	1.85	5.01	3.27	1.3	5.14
	TRINITY_DN57280_c0_g1	IPT3	0	0	0	0.3	0.15	0	0.62	0.35	1.78	0.28	0.11	0	0	0.1	0.08
	TRINITY_DN27918_c0_g1	TRIT1	2.7	3.47	1.33	6.97	5.94	2.46	1.21	2.52	1.68	5.88	3.98	6.86	2.92	3.84	2.91
	TRINITY_DN10253_c0_g1	CKX6	3.68	3.28	2.89	1.3	1.36	0.71	0.93	1.92	1.39	3.51	0.91	2.46	0.9	0.49	1.47
	TRINITY_DN35294_c0_g1	CKX1	0.75	0.77	0.53	0.98	0.03	0.07	0.35	0.26	0.87	0.23	1.51	0.51	0.57	0.72	0.04
	TRINITY_DN3818_c0_g1	CKX5	0.99	2.02	1.06	0.76	0.39	1.77	0.2	0.87	0.8	0.29	1.32	2.06	3.61	0.84	2.86
	TRINITY_DN10253_c0_g2	CKX6	0	0.26	0.33	2.64	2.85	0.6	0.29	0.26	0	0	0	0	0	0	0
	TRINITY_DN33499_c0_g1	CKX3	1.11	1	1.16	0.69	0.79	5.25	1.19	2.34	0.77	1.01	0.98	1.39	0.37	0.06	0.38
	TRINITY_DN43368_c0_g1	UGT73C5	13.57	11.84	15.02	5.48	11.97	5.48	2.3	2.31	3.46	10.4	3.56	5.26	2.9	2.88	1.94
	TRINITY_DN1868_c0_g2	UGT73C1	21.61	30.95	34.91	8.59	10.53	16.21	20.22	49.79	20.14	20.2	27.08	41.7	10.95	5.72	7.77
	TRINITY_DN7521_c0_g1	UGT73C	12.17	18.69	19.02	5.36	6.88	13.49	16.27	29.02	15.73	11.67	17.99	24.04	6.51	3.9	4.71
	TRINITY_DN26904_c0_g2	UGT73C	18.49	31.45	23.19	18.21	5.77	14.83	9.56	25.78	7.22	2.58	32.62	10.55	4.15	5.96	8.33
	TRINITY_DN90743_c0_g1	UGT73C12	10.31	7.11	11.8	5.53	6.6	3.32	11.67	2.09	2.32	5.87	8.27	9.49	0.96	2.1	2.12
	TRINITY_DN39477_c0_g1	UGT73C1	29.91	8.14	12.11	158.85	72.28	109.76	7.97	39.8	14.45	73.74	20.74	80.16	24.1	102.52	70.23
	TRINITY_DN1868_c0_g3	UGT73C2	6.41	3.36	9.13	21.38	6.95	3.13	0.34	3.29	3.45	21.78	3.07	29.2	30.96	12.85	16.72
	TRINITY_DN26904_c0_g1	UGT73C	9.95	15.7	18.59	14.11	4.4	56.93	0	0	4.22	4.1	42.45	108.75	48.25	40.42	18.07
	TRINITY_DN7513_c0_g1	UGT73C1	4.07	2.18	7.44	11.35	8.1	3.85	0	0.48	2.72	13.88	1.13	38.52	15.92	9.16	5.79
	TRINITY_DN4634_c0_g1	UGT73C1	97.72	87.33	52.28	267.14	277.34	167.86	12.69	61.86	70.63	62.34	32.88	72.64	110.27	110.36	22.48
	TRINITY_DN1251_c0_g1	UGT73C1	373.28	381.77	385.06	428.17	660.99	599.97	185.61	240.28	178.78	175.62	231.75	253.23	278.92	345.32	262.27
	TRINITY_DN1868_c0_g1	UGT73C3	219.76	201.77	216.8	256.18	337.26	343.16	125.16	167.26	131.68	120.07	157.26	195.28	160.75	231.75	163.02
	TRINITY_DN22683_c0_g1	UGT73C	19.14	7.26	11.97	0	8.74	25.5	11.48	4.39	5.73	0	3.19	0.77	5.32	3.35	2.72
	TRINITY_DN8799_c0_g1	CISZOG	18.07	17.65	18.45	12.42	15.21	20.37	13.59	21.28	14.35	11.22	5.92	7.22	17.79	7.66	8.02
	TRINITY_DN14464_c0_g1	CISZOG	8.33	13.87	8.72	6.59	9.41	4.9	2.18	2.88	4.91	1.34	4.52	1.02	1.43	2.31	2.29
	TRINITY_DN2818_c0_g1	CISZOG	52.28	54.16	59.17	34.07	46.23	61.03	30.41	64.98	39.85	27.98	18.79	27.02	15.73	10.79	17.26

## Sheet: Table S9
	Table S9 Genes involved in plant hormone signal transduction after KEGG analysis
	gene ID	gene name	FPKM
			Oct.31_1	Oct.31_2	Oct.31_3	Nov.08_1	Nov.08_2	Nov.08_3	Nov.15_1	Nov.15_2	Nov.15_3	Nov.22_1	Nov.22_2	Nov.22_3	Dec.01_1	Dec.01_2	Dec.01_3
Subcluster 1(17)	TRINITY_DN11342_c1_g3	SAUR	5.19	3.37	4.52	3.38	5.09	6.12	3.27	2.79	2.38	8.94	6.34	8.74	4.84	4.29	5
	TRINITY_DN11342_c1_g2	SAUR	5.94	2.67	3.3	3.3	1.28	3.61	1.99	1.55	0.91	5.61	3.91	7.37	2.02	3.33	7.08
	TRINITY_DN5463_c0_g1	SAUR	28	21.64	24.54	34.16	20.7	36.36	15.41	15.58	10.09	21.89	18.98	36.49	19.67	27.99	25.57
	TRINITY_DN4767_c1_g1	SAUR	25.27	21.16	32.34	7.42	10.02	24	8.31	5.51	14.64	20.94	16.48	36.71	7.86	11.99	14.67
	TRINITY_DN19717_c0_g1	SAUR	1.51	0.53	0.33	0.24	0.45	2.51	0.11	0	0.12	5.21	3.79	15.07	2.41	1.8	0.48
	TRINITY_DN10943_c0_g1	SAUR	47.85	16.12	20.37	11.57	29.65	27.48	6.68	3.42	6.12	38.86	11.95	36.18	5.02	12.61	8.94
	TRINITY_DN28980_c0_g1	IAA	21.01	12.27	15.06	16.14	22.01	12.56	6.8	7.17	5.51	29.04	10.82	10.47	21.55	9.08	10.46
	TRINITY_DN64_c0_g1	ARF	10.78	4.44	5.09	0	0	0.13	0.02	4.33	0.04	6.97	0	13.5	5.2	4.32	8.97
	TRINITY_DN8452_c1_g1	ARF	37.93	36.14	42.75	27.55	24.42	24.66	30.02	31.24	30.52	50.59	52.14	47.16	39.03	44.84	57.55
	TRINITY_DN8595_c0_g1	ARF	39.74	34.54	32.67	25.92	20.97	29.48	21.54	23.84	18.9	47.79	50.81	52.28	37.28	32.63	43.79
	TRINITY_DN12508_c0_g1	PYL	9.95	4.86	8.1	6.28	5.34	10	5.86	7.47	4.29	14.33	13.46	25.46	6.72	5.39	8.29
	TRINITY_DN20425_c0_g1	PYL	4.78	5.13	4.5	3.41	6.25	4.17	1.7	2.18	2.2	5.72	3.04	5.84	2.58	1.94	2.63
	TRINITY_DN51499_c0_g1	PYL	13.71	9.57	9.3	8.3	10.41	12.17	1.86	2.88	1.02	18.67	14.71	26.28	16.08	13.73	22.16
	TRINITY_DN38780_c0_g2	PYL	33.78	13.48	24.41	8.18	28.64	16.17	0.18	1.55	0.92	20.84	28.85	45.69	4.28	5.71	9.2
	TRINITY_DN1162_c0_g1	PP2C	58.28	67.18	54.2	38.28	26.38	42.1	60.2	66.75	38.71	70.88	90.36	88.42	77.73	81.43	60.53
	TRINITY_DN28698_c0_g1	SNRK2	0.4	0.47	0.64	0.76	0.72	0.47	0	0	0.15	1.15	0.65	0.89	0.49	0.38	0.45
	TRINITY_DN2166_c0_g1	ARR-A	19.72	18.72	17.74	14.31	11.65	41.26	33.57	42.3	20.75	87.89	109.1	119.62	61.26	73.93	87.32
Subcluster 3(27)	TRINITY_DN10671_c0_g1	SAUR	2.09	1.71	2.13	2.71	1.06	1.73	8.3	3.94	2.18	1.96	3.08	1.51	1.11	0.32	0.51
	TRINITY_DN76654_c0_g1	SAUR	6.65	7.29	10.94	6.15	6.88	5.33	4.07	5.89	2.87	6.71	5.19	12.05	1.82	1.05	0.57
	TRINITY_DN20183_c0_g1	SAUR	5.69	5.51	7.16	5.83	0.13	5.03	7.91	2.02	4.6	4.65	1.49	3.46	1.36	0.51	0.69
	TRINITY_DN1056_c0_g2	IAA	3.26	5.37	4.43	3.93	2.35	6.12	9.2	13.64	8.67	6.29	3.95	8.21	1.35	0.69	0.69
	TRINITY_DN12949_c0_g3	IAA	42.32	56.69	55.73	33.62	30.37	52.06	64.52	82.49	60.32	33.61	17.55	24.51	10.42	7.74	8.12
	TRINITY_DN28814_c0_g1	IAA	20.06	11.58	16.5	17.25	26.12	18.88	52.39	24.53	26.37	20.94	11.45	15.13	9.74	6.63	2.91
	TRINITY_DN2156_c0_g2	IAA	7.55	9.09	9.77	4.76	4.16	7.46	4.6	23.18	6.28	2.84	8.31	5.74	3.01	2.29	1.69
	TRINITY_DN10714_c0_g3	IAA	88.01	90.28	97.61	69.91	60.57	49.84	73.53	50.7	55.77	53.36	69.77	51.42	27.88	26.15	19.5
	TRINITY_DN12949_c0_g1	IAA	88.31	84.17	77.48	62.31	48.4	74.85	166.73	194.03	121.67	95.95	84.76	75.8	80.4	57.82	52.94
	TRINITY_DN24355_c0_g1	IAA	241.29	163.08	241.54	130.3	241.84	203.15	198.32	170.45	195.98	141.9	197.08	132.94	62.1	51.81	69.06
	TRINITY_DN644_c0_g1	AUX1	48.42	71.28	75.16	85.35	84.49	60.91	69.18	57.09	31.96	85.57	15.81	36.96	16.6	12.71	9.28
	TRINITY_DN6952_c1_g2	ARF	12.14	13.57	11.9	7.52	6.01	15.19	17.7	21.69	20.47	9.1	6.67	6.11	2.93	2.97	2.19
	TRINITY_DN6952_c1_g1	ARF	6.27	0	3.26	1.44	4.63	0.87	19.77	9.74	3.4	0.56	0.58	2.41	2.01	0.89	0
	TRINITY_DN2211_c0_g1	ARF	2	2.45	0.46	6.18	10.84	0.7	0	1.16	26.93	0.52	0.68	1.82	2.08	3.92	3.02
	TRINITY_DN28405_c0_g1	GH3	11.75	15.76	20.1	9.8	13.01	10.79	13.12	9.32	15.76	11.39	3.69	14.18	4.65	3.32	4.53
	TRINITY_DN2672_c0_g1	PIF4	41.88	40.76	44.07	22.28	39.58	31.62	16.35	17.5	20.86	13.14	8.47	9.35	5.45	4.74	3.47
	TRINITY_DN885_c0_g1	PIF3	5.05	17.97	8.64	5.8	3.96	15.72	6.04	13.98	20.09	2.47	3.63	2.84	5.81	5.35	5.05
	TRINITY_DN8882_c0_g1	SNRK2	3.98	2.75	4.8	3.1	4.56	4.98	7.14	7.79	6.71	1.87	2.36	3.2	0.89	1.01	1.21
	TRINITY_DN1366_c0_g1	SNRK2	111.14	114.46	116.9	111.49	122.58	115.6	147.45	100.33	97.89	112.64	94.68	80.16	59.54	45.66	55.98
	TRINITY_DN2755_c0_g2	SNRK2	29	32.13	34.93	22.14	30.01	27.1	32.41	28.43	29.57	15.76	19.38	23.04	14.97	15.72	12.89
	TRINITY_DN6255_c1_g2	PP2C	42.18	66.55	39.77	41.1	35.72	82.55	35.84	49.61	56.79	16.49	26.4	16.4	17.5	22.6	19.48
	TRINITY_DN36468_c0_g1	ABF	2.79	2.61	3.48	2.15	2.75	2.23	4.01	4.24	3.39	1.57	1.77	1.87	1.1	0.76	0.65
	TRINITY_DN51757_c0_g1	ABF	14.11	12.1	12.86	12.78	7.93	13.58	19.41	14.17	17.5	11.56	4.93	8.29	6.52	5.07	5.34
	TRINITY_DN37598_c0_g3	GID1	36.94	41.15	37.26	26.25	31.88	32.26	45.08	32.54	36.43	23.88	10.94	15.21	5.48	4.68	6.13
	TRINITY_DN307_c0_g1	GID1	35.96	31.55	35.75	32.48	48.58	35.41	43.27	20.49	45.97	23.78	20.85	22	13.65	17.17	16.02
	TRINITY_DN18555_c0_g1	GID2	18.74	26.98	21.69	14.99	18.51	17.65	50.02	31.78	32.46	14.73	33.37	16.11	15.57	14.39	14.16
	TRINITY_DN83684_c0_g1	DELLA	23.93	35.21	29.55	22.96	21.89	34.75	8.29	23.73	10.51	11.48	6.99	9.03	9.18	4.84	5.07
Subcluster 4(15)	TRINITY_DN16769_c0_g1	SAUR	0.71	0.4	0.32	1.17	2.32	0.46	2.52	0.8	4.23	1.57	3.04	9.61	0.92	1.53	0.31
	TRINITY_DN12040_c0_g1	SAUR	2.34	1.62	1.97	1.78	0.87	0.23	16.24	10.97	1.03	7.61	7.68	4.67	5.48	2.73	2.15
	TRINITY_DN59650_c0_g1	SAUR	7.29	9.88	6.3	2.89	1.14	1.93	20.78	7.24	7.3	5.73	5.1	6.98	9.29	2.77	9.2
	TRINITY_DN49921_c0_g2	SAUR	0.53	0.43	0.41	1.59	1.04	1.36	0.87	1.72	3.67	0.86	1.34	0.85	0.33	2.35	1.66
	TRINITY_DN1098_c2_g1	ARR-B	28.07	35.04	28.14	15.04	16.27	29.86	43.44	32.82	46.72	26.42	34.57	26.59	36.09	44.97	28.7
	TRINITY_DN3248_c0_g1	IAA	8.85	4.88	5.98	9.56	2.57	2.28	17.94	12.26	25.33	30.97	8.91	4.85	3.02	1.24	4.02
	TRINITY_DN9459_c1_g2	IAA	4.79	5.44	2.64	4.13	9.26	7.89	5.53	4.52	20.97	7.41	2.3	3.4	1	4.64	4.93
	TRINITY_DN40336_c0_g1	IAA	0.45	0.17	0.3	0.27	0.45	0.87	5.75	1.08	2.73	0.79	2.31	2.75	2.15	3.3	0.66
	TRINITY_DN1366_c0_g2	SNRK2	0.9	0.47	1.7	0.33	3.01	0.08	11.9	6.34	0.51	0.04	0.08	0.2	1.47	4.15	0.64
	TRINITY_DN24197_c0_g1	SNRK2	2.3	0	3.87	0	1.64	0	13.63	6.72	13.14	1.73	0	1.55	13.68	10.83	0
	TRINITY_DN39985_c0_g1	SNRK2	8.97	7.6	5.01	16.83	14.04	13.99	17.38	8.52	26.63	15.21	31.42	18.05	16.97	15.62	20.35
	TRINITY_DN13244_c0_g1	PP2C	53.98	161.81	71.98	114.03	78.88	172.05	214.12	175.38	286.81	65.21	123.87	82.94	106.01	201.6	136.72
	TRINITY_DN4693_c0_g1	ARF	7.78	14.56	10.09	11.52	7.03	11.85	31.83	22.12	24.89	18.73	23.39	15.87	13.21	11.34	16.77
	TRINITY_DN28942_c0_g1	ARR-A	2.49	3.22	2.12	2.65	4.7	2.88	5.86	9.66	9.73	4.61	4.16	5.49	3.14	2.72	2.5
	TRINITY_DN45150_c0_g1	DELLA	0.92	0.91	0.77	0.56	0.63	1.24	1.47	4.41	2.22	1.35	0.71	0.52	0.24	0.62	0.28
Subcluster 5(19)	TRINITY_DN72753_c0_g1	GH3	1.33	1.97	0.91	0.7	0	1.2	0	0	0	0.15	0.1	0	0	0	0
	TRINITY_DN72753_c0_g2	GH3	0.8	2.52	0.86	0.46	0.29	0.51	0	0	0	0	0.32	0	0	0	0
	TRINITY_DN9652_c0_g1	GH3	15.07	8.31	5.46	3	1.93	1.87	0.83	0.96	1.29	4.62	1.38	0.95	1.75	1.85	2
	TRINITY_DN28217_c0_g1	GH3	0.65	0.35	0.39	1.1	0.06	0.03	0.09	0.39	0.34	0.43	0	0.18	0	0	0
	TRINITY_DN69249_c0_g1	GH3	17	10.22	9.81	14.97	10.96	5.93	7.29	5.17	9.82	8.41	6	10.66	5.09	4.45	6.42
	TRINITY_DN1056_c0_g1	IAA	2.54	6.85	4.51	1.18	1.86	1.58	1.04	4.29	2.94	2.16	1.08	1.18	1.33	0.41	1.09
	TRINITY_DN9459_c1_g1	IAA	2.91	2.91	3.15	1.44	3.06	2.27	0.93	0.44	1.28	0.79	0.31	0.6	0.16	0.25	0.2
	TRINITY_DN83666_c0_g2	IAA	3.37	1.13	5.39	1.53	0.7	1.07	1.7	0.33	2.76	0.29	0.66	0.32	0.39	0.66	1.05
	TRINITY_DN23105_c0_g1	IAA	0.99	1.49	0.49	0.32	0.1	0.3	0.19	0.93	0.92	0	0	0	0	0.92	0.42
	TRINITY_DN2156_c0_g1	IAA	118.35	113.86	119.25	49.1	78.14	67.59	44.58	50.53	77.14	88.39	98.88	82.37	37.62	42.87	48.14
	TRINITY_DN17112_c0_g1	SAUR	14.21	3.63	4.84	6.13	6.18	1.09	1.86	0.51	1.12	0.99	5.16	5.93	0.36	0.09	0.42
	TRINITY_DN22027_c0_g1	SNRK2	4.79	6.64	6.99	3.14	2.38	1.83	3.37	3.83	5.68	1.79	1.58	0.99	2.6	4.46	4.96
	TRINITY_DN3171_c0_g1	SNRK2	113.42	83.14	131.42	21.05	17.63	22.3	78.86	37.25	67.17	30.56	22.56	48.04	12.4	35.71	25.09
	TRINITY_DN3171_c0_g2	SNRK2	30.13	29.91	28.2	22.53	23.71	15.88	23.26	26.78	18.22	14.2	14.58	11.88	7.93	10.29	11.15
	TRINITY_DN4638_c0_g1	PP2C	28.85	31.99	25.8	27.28	25.38	21.36	26.67	25.09	19.09	15.78	14.24	16.11	13.36	12.46	12.74
	TRINITY_DN6632_c0_g1	ABF	40.72	42.11	41.82	33.55	29.82	31.44	23.09	22.69	18.73	10.14	15	8.35	12.06	10.59	14.52
	TRINITY_DN618_c0_g1	ABF	70.77	64.31	61.21	41.59	37.56	38.72	57.26	62.69	42.41	20.81	18.24	21.32	75.59	75.29	57.85
	TRINITY_DN4335_c0_g3	ABF	0.78	4.72	0.29	0.19	1.17	0.06	0.17	1.98	0	0	0	0	0	0.27	0.3
	TRINITY_DN885_c1_g1	PIF3	9.2	5.86	8.01	2.21	4.12	2.39	1.72	2.66	4.25	4.91	4.38	3.29	2.59	2.74	4.04

## Sheet: Table S10
Table S10 Genes involved in starch and sucrose metabolism after WGCNA
Gene ID	Gene name	Module	The gene significance (GS)					FPKM
			Strach	Sucrose	Amylose	UDP-glucose	Levan	Oct.31_1	Oct.31_2	Oct.31_3	Nov.08_1	Nov.08_2	Nov.08_3	Nov.15_1	Nov.15_2	Nov.15_3	Nov.22_1	Nov.22_2	Nov.22_3	Dec.01_1	Dec.01_2	Dec.01_3
TRINITY_DN187_c0_g3	glgC	greenyellow	-0.564	-0.0514	0.298	0.3	-0.51	28.71	35.92	26.1	62.13	49.04	89.11	124.17	124.31	175.71	63.56	76.53	65.04	56.61	49.61	24.48
TRINITY_DN187_c0_g1	glgC	purple	-0.599	0.88	0.95	0.652	-0.1	46.03	41.62	28.96	57.05	22.75	44.01	100.24	68.24	121.24	155.32	185.43	165.62	235.08	212.58	190.6
TRINITY_DN3464_c0_g2	glgC	blue	0.643	-0.542	-0.42	-0.678	0.326	18.39	21.89	19.24	4.35	1.89	3.35	13.12	7.3	5.11	7.34	2.16	7.61	2.09	1.93	1.43
TRINITY_DN252_c4_g1	glgA	yellow	0.181	-0.694	-0.583	-0.395	-0.157	8.91	10.16	10.2	7.48	6.15	25.14	10.24	12.55	8.35	7.85	5.01	5.58	5.16	4.05	3.86
TRINITY_DN63201_c0_g1	glgB	purple	-0.555	0.428	0.687	0.392	-0.324	3.6	3.39	3.06	3.29	2.14	4.36	7.97	7.86	9.44	4.31	5.04	7.05	5.28	4.42	6.24
TRINITY_DN13858_c0_g1	ISA2	blue	0.524	-0.92	-0.713	-0.538	-0.00913	3.75	5.25	6.24	3.3	4.13	4.91	2.91	5.63	4.37	2.87	3.21	2.59	1.54	1.4	1.35
TRINITY_DN15839_c0_g1	AMY	yellow	0.28	-0.562	-0.751	-0.327	0.139	19.89	9.58	11.07	13.71	35.63	16.4	4.58	3.05	6.99	14.56	2.83	7.54	5.84	5.26	3.42
TRINITY_DN20546_c0_g1	BAM6	blue	0.667	-0.831	-0.729	-0.604	0.201	4.25	2.94	4.54	0.63	2.11	2.42	1.08	3.65	0.33	0.63	0.62	0.2	0.75	0	0.19
TRINITY_DN16469_c0_g1	BAM3	blue	0.758	-0.763	-0.616	-0.593	0.323	29.36	31.71	44.73	11.71	15.54	13.09	15.92	23.3	7.06	13.86	12.76	21.36	6.79	5.84	4.63
TRINITY_DN3694_c0_g1	BAM9	blue	0.705	-0.809	-0.79	-0.606	0.239	62.84	78.14	72.82	41.38	70.66	60.46	61.98	32.94	42.79	28.42	47.04	32.64	17.86	23.7	23.94
TRINITY_DN2512_c1_g2	EG11-like	yellow	0.428	-0.805	-0.719	-0.52	-0.135	2.61	3.56	6.24	1.8	3.06	6.84	4.69	5.15	1.88	0.95	0.73	1.38	0.07	0.27	0.33
TRINITY_DN23754_c0_g1	EG11	blue	0.459	-0.705	-0.628	-0.514	0.0229	1.83	2.62	5.78	0.65	0.94	4.63	2.24	3.7	0.3	0.22	0	2.14	0	0	0
TRINITY_DN51949_c0_g1	EG11	greenyellow	-0.707	0.143	0.408	0.603	-0.613	1.05	0.83	0.85	1.59	3.25	3.2	4.32	4.15	4.79	2.82	1.99	3.84	2.92	1.69	1.61
TRINITY_DN11491_c0_g1	EG6	yellow	0.137	-0.804	-0.676	-0.299	-0.292	17.91	20.87	21.95	25.49	104.32	64.63	21.69	67.45	35.88	15.7	6.22	9.91	5.4	3.03	3.53
TRINITY_DN656_c0_g1	EG24	blue	0.611	-0.738	-0.557	-0.642	0.0717	2.18	5.84	4.56	0.7	1.11	1.55	2.16	8	0.63	0.63	0.28	0.46	0.13	0.02	0.03
TRINITY_DN8363_c0_g1	UGP2	blue	0.52	-0.766	-0.706	-0.661	0.0786	10.46	10.58	18.65	9.8	6.25	8.09	13.55	4.68	6.67	2.15	5.11	0.71	2.33	1.45	1.24
TRINITY_DN8145_c0_g1	UGP2	red	0.4	-0.323	-0.347	-0.651	0.101	12.07	7.99	15.53	8.15	4.76	5.56	9.92	7.5	10.4	5.02	5.12	5.48	5.14	6.96	6.95
TRINITY_DN49278_c0_g1	SUS	blue	0.67	-0.811	-0.658	-0.647	0.325	5.68	4.3	3.05	2.64	1.81	2.38	1.87	2.76	2.01	2.67	3.56	0.99	0.24	0.46	0.26
TRINITY_DN13417_c0_g2	TPS	greenyellow	-0.415	-0.0766	0.243	0.419	-0.56	4.04	4.53	4	7.25	10.16	7.91	14.72	21.14	15.76	17.09	9.68	12.93	5.99	3.15	4.99
TRINITY_DN7645_c0_g1	TPP	yellow	0.297	-0.677	-0.585	-0.456	0.158	4.37	3.76	7.01	5.81	2.69	3.75	1.51	4.1	2.05	4.12	1.74	4.31	3.41	1.29	0.79
TRINITY_DN8905_c0_g1	BGL12	blue	0.659	-0.806	-0.693	-0.716	0.172	4.6	3.53	7.45	1.68	2.51	0.61	0.71	5.72	1.45	0.45	0.45	0.64	0.08	0.13	0.16
TRINITY_DN2095_c0_g1	BGL18	blue	0.464	-0.879	-0.688	-0.536	0.00553	8.9	10.84	10.42	6.14	7.31	11.27	8.21	12.7	8.22	4.4	5.34	4.23	2.55	1.32	2.97
TRINITY_DN21332_c0_g1	BGL44-like	yellow	0.456	-0.895	-0.707	-0.522	-0.0668	27.19	39.32	45.68	13.06	52.55	32.9	20.09	107.81	17.1	9.24	5.32	9.43	3.27	1.97	1.71
TRINITY_DN3816_c0_g1	BGL	blue	0.851	-0.592	-0.608	-0.718	0.329	19.35	26.25	22.19	11.32	13.23	12.38	16.54	13.74	8.92	15.48	9.97	11.08	8.44	11.72	8.72
TRINITY_DN18988_c0_g1	BGL40	yellow	0.196	-0.615	-0.596	-0.0903	0.0653	24.77	14.94	38.79	49.42	109.17	73.95	3.84	22.48	5.78	36.73	27.89	48.38	14.8	7.71	2.79
TRINITY_DN55918_c0_g1	BGL12	magenta	-0.609	0.295	0.558	0.62	-0.58	1.86	1.3	1.87	2.49	3.61	3.15	4.06	6	6.59	4.49	5.1	4.96	2.67	4.29	2.69
TRINITY_DN15670_c0_g1	GN4	blue	0.565	-0.497	-0.35	-0.432	0.161	3.39	3.31	3.95	1.25	1.9	1.45	1.82	5.22	1.3	2.28	1.18	3	1.29	1	1.69
TRINITY_DN3351_c0_g3	GN	red	0.792	-0.463	-0.432	-0.692	0.65	245.62	274.13	237.69	50.24	54.48	61.17	81.06	47.1	95.03	45.81	71.65	79.89	60.31	60.32	59.08
TRINITY_DN3351_c0_g1	GN	blue	0.685	-0.675	-0.676	-0.757	0.445	39.65	45.52	50.98	10.44	10.98	5.99	7.28	5.59	19.5	2.78	3.08	9.42	3.12	1.9	5.54
TRINITY_DN1655_c0_g3	INV	yellow	0.335	-0.819	-0.727	-0.331	-0.0441	7.04	12.33	10.15	6.12	20.6	29.88	3.79	18.48	3.1	6.82	3.15	6.11	3.6	1.9	1.22
TRINITY_DN25832_c0_g1	INV	red	0.471	0.0075	-0.275	-0.318	0.541	4.6	3.07	7.9	2.19	1.26	1.33	0.72	0	0.09	1.25	1.01	4.8	2.05	2.54	3.02
TRINITY_DN8503_c0_g1	malZ	blue	0.559	-0.896	-0.813	-0.7	0.29	20.79	32.2	18.98	17.41	21.33	23.9	13.54	23.33	10.27	5.73	9.77	10.51	8.86	5.59	7.28
TRINITY_DN409_c0_g1	malZ	blue	0.567	-0.41	-0.353	-0.516	0.611	2.97	13.2	2.74	1.05	0.34	2.5	0.35	1.23	0	2.14	0.49	3.47	2.31	0.9	0
TRINITY_DN42109_c0_g1	HK	greenyellow	-0.31	-0.259	-0.0606	0.201	-0.655	0.5	0.74	0.66	0.92	2.21	3.29	2.06	5.96	1.87	2.96	0.6	1.13	0.8	0.77	0.54
TRINITY_DN4778_c1_g1	scrK	blue	0.63	-0.903	-0.784	-0.694	0.136	90.92	104.76	132.57	37.89	59.94	56.01	43.5	100.71	31.35	26.51	15.2	31.54	11.81	9.88	9.34
TRINITY_DN33723_c0_g1	scrK8	blue	0.606	-0.921	-0.773	-0.675	0.137	105.45	115.83	116.14	52.36	70.56	47.03	42.83	94.17	39.29	43.17	18.61	29.53	9.88	7.86	5.54
TRINITY_DN12261_c0_g2	SCKL2	purple	-0.71	0.609	0.769	0.634	-0.603	3.09	3.24	4.77	5.54	3.04	6.12	9.17	9.94	10.02	8.03	8.01	7.74	7.24	6.81	9.3
TRINITY_DN12516_c0_g1	SCKL1	greenyellow	-0.611	0.0593	0.279	0.344	-0.67	8.16	6.21	6.67	11.17	9.96	13.62	19.78	18.41	17.28	13.5	10.06	11.24	9.02	9.26	8.69

[truncated: 2 more sheets: Table S11, Table S12]
